# Supplementary material for: Harmonising Definitions of Multiple Long Terms Conditions for Inflammation Research: A Co-Production Approach
Source: Research Square preprint supplement (doi:10.21203/rs.3.rs-7773449/v1), 2025-10-29
Supplement: Supplementary file 1 [file 05c72bdba4ac9922a966944f.xlsx]

## Sheet: Supplementry file, Table 3 Infe
Infection	Infection Site	Original Read Code	Cleansed Read Code	Med Code ID	Snomed CT Concept ID	Snomed CT Description ID
Chest infection	pneumonia	H06z0-1	H06z011	546411000006111	195742007	301131016
Upper respiratory infection NOS	Viral URTI	H05z	H05z.00	396089010	54150009	89996011
Mumps	other	A72	A72..00	61702015	36989005	61702015
Acute tonsillitis	bacterial URTI	H03	H03..00	29982014	17741008	29982014
Acute laryngitis	Viral URTI	H040	H040.00	12028011	6655004	12028011
Chickenpox - varicella	other	A52	A52..00	546761000006119	38907003	491830017
Urinary tract infection, site not specified NOS	UTI	K190z	K190z00	304323018	68566005	113884018
Wheezy bronchitis	pneumonia	H302	H302.00	2163183015	405944004	2163183015
Orchitis	Genital	K240	K240.00	410561019	274718005	410561019
Cellulitis of external ear	Cellulitis	M038	M038.00	158680013	232214001	347928014
Sinusitis	bacterial URTI	H01-1	H01..11	61668014	36971009	61668014
Glandular fever	other	A75-1	A75..11	406382010	271558008	406382010
Otitis media NOS	bacterial URTI	F52z	F52z.00	399498017	65363002	108597015
Gonorrhoea	other	A98z-1	A98z.11	477448018	15628003	477448018
Respiratory tract infection	pneumonia	H06z1-1	H06z111	411488017	275498002	411488017
Measles	other	A55	A55..00	24142018	14189004	24142018
Cellulitis and abscess NOS	Cellulitis	M03z	M03z.00	540621000006119	70759006	117539013
Throat infection - pharyngitis	Viral URTI	H02-3	H02..13	100101000006117	405737000	2157515013
Acute bronchitis	pneumonia	H060	H060.00	18268014	10509002	18268014
Diverticulitis	Diverticulitis	J511	J511.00	450775010	307496006	450775010
Common cold	Viral URTI	H00-1	H00..11	136463019	82272006	136463019
Acute myringitis without otitis media	bacterial URTI	F540	F540.00	299102019	194311006	299102019
Cystitis	UTI	K15	K15..00	65119018	38822007	65119018
Herpes zoster	other	A53	A53..00	8902018	4740000	494820013
Acute pharyngitis NOS	Viral URTI	H02z	H02z.00	459581000006119	363746003	486416017
Meningococcal meningitis	Neuro	A360	A360.00	296779018	192644005	296779018
Scarlet fever	bacterial URTI	A341-1	A341.11	50618013	30242009	50618013
German measles	other	A56-1	A56..11	61157013	36653000	61157013
Mastitis	Puerperal	K310-3	K310.13	75366010	45198002	75366010
Acute cholecystitis	Hepatobiliary	J650	J650.00	108454010	65275009	108454010
Shingles	other	A53-1	A53..11	8904017	4740000	8904017
Herpes simplex	other	A54	A54..00	146891016	88594005	146891016
Influenza	Viral URTI	H27	H27..00	11203012	6142004	11203012
Epididymo-orchitis	Genital	K242	K242.00	2475615019	197983000	2475615019
Pneumonia due to unspecified organism	pneumonia	H26	H26..00	301408011	312342009	456043010
Acute salpingitis	Genital	K4003	K400300	15708013	8912009	15708013
Toxaemia NOS	other	L124-2	L124.12	355622019	15394000	477346015
Pulmonary tuberculosis	pneumonia	A11	A11..00	239551014	154283005	239551014
Endocervicitis unspecified	Genital	K4201	K420100	304728013	31354001	52424018
Cellulitis and abscess of leg NOS	Cellulitis	M036z	M036z00	308354012	449702005	2912778018
Salmonella food poisoning	Gastrointestinal	A020-2	A020.12	443811013	302229004	443811013
Diphtheria	bacterial URTI	A32	A32..00	1777082016	397428000	1777082016
Whooping cough	bacterial URTI	A33	A33..00	46589015	27836007	46589015
Acute rheumatic fever	Cardiovascular	G0	G0...00	44257011	26424001	44257011
Malaria	other	A84	A84..00	102111015	61462000	102111015
Chronic rhinitis	Viral URTI	H120	H120.00	142764012	86094006	142764012
Chronic catarrhal rhinitis	Viral URTI	H1201	H120100	396095011	266342009	396095011
Septicaemia	other	A38	A38..00	291664017	91302008	151281010
Bronchopneumonia due to unspecified organism	pneumonia	H25	H25..00	396105015	396285007	1776258010
Other salmonella infections	Gastrointestinal	A02	A02..00	286071012	302231008	443815016
Acute epiglottitis NOS	bacterial URTI	H043z	H043z00	301080012	29608009	49531010
Acute pharyngitis	Viral URTI	H02	H02..00	486416017	363746003	486416017
Nasal catarrh - acute	Viral URTI	H00-4	H00..14	681561000006119	64531003	2161421018
Hepatitis unspecified	other	J633	J633.00	303506017	128241005	474350017
Quinsy	bacterial URTI	H15-1	H15..11	25522012	15033003	25522012
Rubella	other	A56	A56..00	61155017	36653000	61155017
Empyema of gallbladder	Hepatobiliary	J650-2	J650.12	121449018	73125001	121449018
Other bacterial diseases	other	A3	A3...00	36941000006116	87628006	145291019
Genital herpes simplex	other	A541	A541.00	56485016	33839006	56485016
Pleurisy	pneumonia	H51	H51..00	301644013	196075003	301644013
Acute sinusitis	bacterial URTI	H01	H01..00	26785019	15805002	26785019
Acute bronchiolitis	pneumonia	H061	H061.00	10187013	5505005	10187013
Myalgic encephalomyelitis	other	F286-5	F286.15	496413011	52702003	496413011
Viral infection NOS	other	A79z	A79z.00	61301000006115	34014006	56799018
Prostatitis NOS	Genital	K21z	K21z.00	304402011	9713002	16976011
Viral labyrinthitis	other	F5635	F563500	2471473019	409711008	2471473019
Breast abscess	Puerperal	K318	K318.00	524971000006117	28432003	47587013
Ophthalmic herpes simplex	other	A544	A544.00	286746015	186542001	286746015
Female pelvic infection	Genital	K40z-2	K40z.12	668261000006111	198130006	304641016
Pyelitis unspecified	Pyelonephritis	K10y1	K10y100	304085018	27174002	45445014
Schistosomiasis - bilharziasis	other	AC0	AC0..00	227585011	10087007	227585011
Retroperitoneal abscess	Peritonitis	J5526	J552600	54048019	32362007	54048019
Acute bilateral otitis media	bacterial URTI	F528	F528.00	299073014	194290005	299073014
Croup	Viral URTI	H044	H044.00	118208010	85915003	142425010
Erysipelas	Cellulitis	A35	A35..00	74483012	44653001	74483012
Campylobacter gastrointestinal tract infection	Gastrointestinal	A0743	A074300	533201000006116	18081009	30543016
Coryza - acute	Viral URTI	H00-2	H00..12	598191000006116	82272006	136465014
Acute tracheitis	bacterial URTI	H041	H041.00	44623012	26650005	44623012
Laryngotracheitis	bacterial URTI	H042-1	H042.11	91647017	55130001	91647017
Pyogenic arthritis, unspecified	Bone	N010-1	N010.11	80383012	48245008	80383012
Urinary tract infection, site not specified	UTI	K190	K190.00	74781000006117	68566005	113884018
Cervicitis unspecified	Genital	K4200	K420000	304727015	37610005	486760016
[X]Cellulitis of other parts of limb	Cellulitis	M081	M081.00	370601000006113	123951002	192440011
Recurrent cystitis	UTI	K155	K155.00	304205011	197853008	304205011
Acute viral bronchitis unspecified	pneumonia	H060w	H060w00	301120012	233601004	350046011
Cellulitis and abscess of hand	Cellulitis	M034-1	M034.11	540921000006112	267780000	399899017
Staphylococcal infection	other	A3B1	A3B1.00	93216011	56038003	93216011
Infective hepatitis	Hepatobiliary	A701-1	A701.11	222891000000119	40468003	67481015
Hepatitis in malaria	Hepatobiliary	J6320	J632000	1234780014	83072009	1234780014
Infection ear	bacterial URTI	F52z-1	F52z.11	780361000006114	129127001	207839010
Psoas abscess	Muscle	J552C-2	J552C12	396381017	266463007	396381017
[D]Unspecified viraemia	other	R107	R107.00	317668018	2528003	482897017
Recurrent urinary tract infection	UTI	K190-1	K190.11	183141000006112	197927001	304319014
Salpingitis unspecified	Genital	K4026	K402600	304668016	88157006	146147019
Pneumonia due to mycoplasma pneumoniae	pneumonia	H231	H231.00	2164029012	46970008	494705012
Herpes labialis	other	A54z-1	A54z.11	821961000006114	1475003	3570019
Meningococcal septicaemia	other	A362	A362.00	492822016	4089001	492822016
Meningococcal infection	other	A36	A36..00	39482013	23511006	39482013
Epididymitis	Genital	K241	K241.00	52004013	31070006	52004013
Recurrent acute tonsillitis	bacterial URTI	H037	H037.00	301047017	195677001	301047017
Chronic hepatitis	Hepatobiliary	J614	J614.00	127487019	76783007	127487019
Chronic aggressive hepatitis	Hepatobiliary	J6142	J614200	553311000006111	197284004	303401012
Endometritis unspecified	Genital	K41z0	K41z000	304719012	78623009	130465017
Chickenpox	other	A52-1	A52..11	65259010	38907003	65259010
Streptococcal sore throat	bacterial URTI	A340	A340.00	73157016	43878008	73157016
Cellulitis and abscess of axilla	Cellulitis	M0331	M033100	308328016	200667003	308328016
Infections of kidney	Pyelonephritis	K10	K10..00	779911000006110	129128006	207843014
Female pelvic inflammatory diseases	Genital	K4	K4...00	668281000006118	198130006	304641016
Tuberculosis	other	A1	A1...00	94320019	56717001	94320019
Lobar (pneumococcal) pneumonia	pneumonia	H21	H21..00	739941000006111	266350000	396103010
Cellulitis and abscess of back	Cellulitis	M0322	M032200	308319017	200658003	308319017
Pyelonephritis unspecified	Pyelonephritis	K10y0	K10y000	304084019	45816000	76408015
Cellulitis and abscess of groin	Cellulitis	M0326	M032600	308323013	200662009	308323013
Cholecystitis NOS	Hepatobiliary	J651z	J651z00	303583011	76581006	127173011
Laryngotracheobronchitis	pneumonia	H301	H301.00	142425010	85915003	142425010
Hydrosalpinx	Genital	K4015	K401500	36435017	21711003	36435017
Acute pelvic abscess - female	Genital	K4031-1	K403111	355297014	237040006	355297014
Acute gonococcal vulvovaginitis	other	A9802	A980200	5093017	2390000	5093017
Acute appendicitis with peritonitis	Peritonitis	J200	J200.00	302683013	196781001	302683013
Cellulitis and abscess of foot unspecified	Cellulitis	M0370	M037000	308358010	267783003	399903012
Tonsillitis	bacterial URTI	H03-2	H03..12	149482010	90176007	149482010
Osteomyelitis, unspecified	Bone	N302	N302.00	400324019	60168000	99949018
Dysenteric diarrhoea	Gastrointestinal	A0820	A082000	198017011	46799006	198017011
Sepsis	other	A38z-1	A38z.11	151281010	91302008	151281010
Acute suppurative otitis media	bacterial URTI	F520	F520.00	299061014	194281003	299061014
Flu like illness	Viral URTI	H27z-1	H27z.11	762181000006116	95891005	1235951017
Leptospirosis	other	AA0	AA0..00	128434017	77377001	128434017
Viral meningitis NOS	Neuro	A42z	A42z.00	395347018	58170007	96676015
Peritonitis	Peritonitis	J55	J55..00	81079010	48661000	81079010
Tuberculosis of intestines, peritoneum and mesenteric glands	other	A14	A14..00	286270015	186225008	286270015
Tuberculosis of bones and joints	Bone	A151	A151.00	24141013	14188007	476139013
Cellulitis and abscess of knee	Cellulitis	M0362	M036200	308351016	200680000	308351016
Acute prostatitis	Genital	K210	K210.00	131754019	79411002	131754019
Salmonella gastroenteritis	Gastrointestinal	A020	A020.00	443812018	42338000	70642011
Chronic abscess of the female pelvis	Genital	K4043	K404300	1232567014	64532005	1232567014
Acute epididymitis	Genital	K2414	K241400	72542013	43491000	72542013
Female pelvic inflammatory diseases NOS	Genital	K40z	K40z.00	396762011	198130006	304641016
Empyema	pneumonia	H50	H50..00	456436010	312682007	456436010
Unspecified meningitis	Neuro	F02z	F02z.00	296830015	7180009	12838019
Shigella sonnei (group D)	Gastrointestinal	A033	A033.00	395316012	4298009	8235019
Hepatitis C	Hepatobiliary	A70z0	A70z000	84516016	50711007	84516016
Meningitis due to lymphocytic choriomeningitis virus	Neuro	F0115	F011500	706481000006111	398136003	1777697019
Encephalitis NOS	Neuro	F03z	F03z.00	399392017	45170000	75325010
Other chronic osteomyelitis	Bone	N301-1	N301.11	526161000006116	63375009	105352012
Mycoplasma infection	other	A3By3	A3By300	286619017	186464008	286619017
Chest cold	Viral URTI	H07	H07..00	301143015	50417007	83997014
Acute pyelonephritis	Pyelonephritis	K101	K101.00	61206018	36689008	61206018
Mastoiditis NOS	bacterial URTI	F53z	F53z.00	299100010	52404001	87211016
Chest infection NOS	pneumonia	H06z0	H06z000	396090018	50417007	83992015
Unspecified bacterial enteritis	Gastrointestinal	A075	A075.00	286165015	75375008	125187010
Cystitis of pregnancy	UTI	L166-1	L166.11	411392011	275412000	411392011
Upper respiratory tract infection NOS	Viral URTI	H05z-1	H05z.11	73091000006118	54150009	89996011
Chronic urinary tract infection	UTI	K1904	K190400	304321016	197928006	304321016
Cellulitis and abscess of cheek	Cellulitis	M0300-1	M030011	399896012	267777001	399896012
Other chronic osteomyelitis	Bone	N301	N301.00	68341014	40970001	68341014
Cellulitis and abscess of neck	Cellulitis	M031	M031.00	399898013	267779003	399898013
Acute poliomyelitis	other	A40	A40..00	1777666018	398102009	1777666018
Catarrhal child	Viral URTI	H1201-1	H120111	539491000006112	161959005	252422017
Parametritis unspecified	Genital	K4050	K405000	304685019	280483007	418097016
Fifth disease	other	A570-1	A570.11	57964015	34730008	57964015
Viral hepatitis C without mention of hepatic coma	Hepatobiliary	A7050	A705000	286871011	50711007	84513012
HIV positive	other	43C3-1	43C3.11	257855012	165816005	257855012
Haemophilus meningitis	Neuro	F000	F000.00	296775012	192643004	296775012
Cellulitis and abscess of thigh	Cellulitis	M0361	M036100	308350015	200679003	308350015
Viral (serum) hepatitis B	Hepatobiliary	A703	A703.00	61061000006116	66071002	109733012
Cellulitis and abscess of buttock	Cellulitis	M035	M035.00	308344013	200676005	308344013
Cellulitis and abscess of hand unspecified	Cellulitis	M0340	M034000	399900010	267780000	399899017
Viral myalgia	other	N2413	N241300	359719015	240107001	359719015
Tubo-ovarian abscess	Genital	K4022	K402200	97962011	58949002	97962011
Infectious mononucleosis	other	A75	A75..00	406380019	271558008	406380019
Calculous pyelonephritis	Pyelonephritis	K1006	K100600	39884018	23754003	39884018
Chronic prostatitis	Genital	K211	K211.00	33507011	19905009	33507011
Recurrent UTI	UTI	K1903-1	K190311	183171000006116	197927001	304319014
Infections of kidney in pregnancy	Pyelonephritis	L1665	L166500	305976014	199110003	305976014
Viral gastroenteritis	other	A07y0	A07y000	61191000006113	111843007	179018017
Viral illness	other	A79z-1	A79z.11	56807016	34014006	56807016
Giardiasis - Lambliasis	other	A061	A061.00	802121000006117	58265007	96833015
Viral (infectious) hepatitis A	Hepatobiliary	A701	A701.00	222881000000116	25102003	482836011
Viral hepatitis	Hepatobiliary	A70	A70..00	7302012	3738000	7302012
Tracheobronchitis NOS	pneumonia	H300	H300.00	301437010	13617004	23240014
Scarlatina	bacterial URTI	A341-2	A341.12	50619017	30242009	50619017
Cellulitis and abscess of elbow	Cellulitis	M0333	M033300	308330019	200669000	308330019
Acute nasopharyngitis	Viral URTI	H00	H00..00	136470019	82272006	136470019
Tuberculosis of spine	Bone	A150	A150.00	1228336010	35984006	1228336010
Tuberculosis of kidney	other	A160	A160.00	73938014	44323002	73938014
Infectious colitis, enteritis and gastroenteritis NOS	Gastrointestinal	A080z	A080z00	286182018	715852004	3303930018
Lower resp tract infection	pneumonia	H06z1	H06z100	733471000006110	50417007	83992015
Cellulitis and abscess of toe unspecified	Cellulitis	M0210	M021000	308283013	200638004	308282015
Streptococcal infection	other	A3B0	A3B0.00	142176018	85769006	142176018
Cellulitis and abscess of arm	Cellulitis	M033	M033.00	308326017	449717009	2913219010
Cellulitis and abscess of wrist	Cellulitis	M0341	M034100	308342012	200674008	308342012
Chronic cystitis unspecified	UTI	K152y	K152y00	304186019	33655002	56180018
Trachoma	other	A76	A76..00	5391012	2576002	5391012
Hand, foot and mouth disease	other	A743	A743.00	2162360015	266108008	395360012
Dermatitis herpetiformis	other	M140	M140.00	178429018	111196000	178429018
Cellulitis and abscess of finger unspecified	Cellulitis	M0200	M020000	308270012	200630006	308269011
Tuberculosis of bones and joints	Bone	A15	A15..00	1494889019	17653001	1494889019
Cellulitis and abscess of hip	Cellulitis	M0360	M036000	308349015	200678006	308349015
Peritonsillar abscess - quinsy	bacterial URTI	H15	H15..00	229081000006112	15033003	25521017
Perinephric abscess	Pyelonephritis	K1021	K102100	133779010	80640009	133779010
Sepsis of the newborn	other	Q40A	Q40A.00	316478018	206376005	316478018
Basal pneumonia due to unspecified organism	pneumonia	H261	H261.00	451130014	300999006	442211014
Acute left otitis media	bacterial URTI	F526	F526.00	299071011	194288009	299071011
Tuberculous - cervical lymphadenitis	other	A1720	A172000	82801000006118	54084005	496856013
Mycotic mycetomas	other	AB64	AB64.00	683761000006114	410038006	2477702018
Treponemal infection	other	A97-2	A97..12	503244019	76272004	503244019
Rhinitis - acute	Viral URTI	H00-6	H00..16	162421000006116	82272006	136468011
Tuberculosis of bladder	UTI	A161	A161.00	53904019	32268008	53904019
Bordetella pertussis	bacterial URTI	A330	A330.00	9799018	26484003	483240018
Enteritis due to Yersinia enterocolitica	Gastrointestinal	A0744	A074400	1234534014	711167005	3047859018
Arachnoiditis	Neuro	F023	F023.00	14563011	8217007	14563011
Meningitis of unspecified cause	Neuro	F02	F02..00	296826018	7180009	12838019
Dengue - breakbone fever	other	A61	A61..00	612911000006118	38362002	63435016
Bacillary dysentery	Gastrointestinal	A030-1	A030.11	409836012	274081004	409836012
Cellulitis and abscess of toe	Cellulitis	M021	M021.00	308282015	200638004	308282015
Gonococcal infections	other	A98	A98..00	805381000006112	15628003	26490015
Cellulitis and abscess of face	Cellulitis	M030	M030.00	308300010	200645004	308300010
Acute follicular tonsillitis	bacterial URTI	H031	H031.00	301036012	195667003	301036012
Mumps encephalitis	Neuro	F0305-1	F030511	52880019	31646008	52880019
Gonococcal cellulitis	Cellulitis	A98yy-4	A98yy14	360374010	240584003	360374010
Appendix abscess	Peritonitis	J201-2	J201.12	221031000000117	62224002	1232298010
Helminthiasis NOS	other	AC8z	AC8z.00	287856017	27601005	46188015
Typhoid fever	Gastrointestinal	A010	A010.00	9059014	4834000	9059014
Pyogenic arthritis, unspecified	Bone	N010	N010.00	495040011	372939007	1229170014
Cellulitis NOS	Cellulitis	M03z0	M03z000	308368017	128045006	474280013
Recurrent upper respiratory tract infection	Viral URTI	H054	H054.00	301088017	195708003	301088017
Lyme disease	other	A8710	A871000	39462014	23502006	39462014
TB chemotherapy	other	8BAD1	8BAD100	282858010	182975000	282858010
Infection of kidney NOS	Pyelonephritis	K10z	K10z.00	304091016	129128006	207842016
Tuberculosis of peripheral lymph nodes	other	A172	A172.00	127902015	77038006	127902015
Laryngitis sicca	Viral URTI	H1604	H160400	98755014	59454008	98755014
Paratyphoid fever NOS	Gastrointestinal	A01z	A01z.00	286070013	85904008	142408013
Herpetic meningoencephalitis	Neuro	A543	A543.00	16921016	9678009	16921016
Chronic pharyngitis	Viral URTI	H121	H121.00	1284016	140004	1284016
Orbital cellulitis	Cellulitis	F4G01	F4G0100	298680016	194005002	298680016
Acute right otitis media	bacterial URTI	F527	F527.00	299072016	194289001	299072016
Cellulitis and abscess of chest wall	Cellulitis	M0320	M032000	308317015	200656004	308317015
Streptococcal meningitis	Neuro	F002	F002.00	7767019	4510004	7767019
Cellulitis and abscess of perineum	Cellulitis	M0327	M032700	308324019	200663004	308324019
Hepatitis in cytomegalic inclusion virus	Hepatobiliary	J6311	J631100	2475553015	186698009	2475553015
Pyuria, site not specified	UTI	K1901	K190100	195791000006119	4800001	9001019
Liver abscess NOS	Hepatobiliary	J620z	J620z00	303475019	27916005	46731011
Cellulitis of scrotum	Cellulitis	K2843	K284300	58130016	34830002	58130016
Erythema infectiosum - fifth disease	other	A570	A570.00	648231000006111	34730008	57963014
Aphthous fever	other	A784-1	A784.11	139118012	266108008	395359019
Osteomyelitis, unspecified	Bone	N3030	N303000	235391000006113	203245006	311894019
PID - pelvic inflammatory disease	Genital	K40z-3	K40z.13	304640015	198130006	304640015
Syphilis	other	A97-1	A97..11	126672010	76272004	126672010
Pneumococcal meningitis	Neuro	F001	F001.00	85251019	51169003	85251019
Intestinal helminthiases NOS	other	AC7z	AC7z.00	287847013	26249004	43968010
Tuberculosis lichenoides	other	A1706	A170600	1235995011	9768003	1235995011
Chronic pyelonephritis	Pyelonephritis	K100	K100.00	105227013	63302006	105227013
Chronic salpingitis	Genital	K4013	K401300	92337013	55551005	92337013
Pharyngolaryngitis	Viral URTI	H055	H055.00	301089013	195709006	301089013
Epididymitis unspecified	Genital	K2412	K241200	304428014	31070006	52004013
Subphrenic abscess	Peritonitis	J5521	J552100	87327013	52478002	87327013
Osteomyelitis, unspecified	Bone	N3025	N302500	311860016	60168000	99949018
Cellulitis and abscess of finger	Cellulitis	M020	M020.00	308269011	200630006	308269011
Acute gonococcal urethritis	UTI	A9801	A980100	49984015	29864006	49984015
Acute viral pharyngitis	Viral URTI	H024	H024.00	301028015	195662009	301028015
Recurrent chest infection	pneumonia	H06z2	H06z200	451444011	448739000	2900007017
Streptococcal pharyngitis	bacterial URTI	A3402	A340200	73158014	43878008	73158014
Tuberculosis of bones and joints	Bone	A153	A153.00	286281017	186231006	286281017
Interstitial pneumonia	pneumonia	H56y1	H56y100	107470010	64667001	107470010
Leishmaniasis	other	A85	A85..00	133739018	80612004	133739018
Bacterial endocarditis	Cardiovascular	G510-1	G510.11	442438016	301183007	442438016
Cellulitis and abscess of abdominal wall	Cellulitis	M0323	M032300	308320011	200659006	308320011
O/E - consolidation present	pneumonia	23E2	23E2.00	253995014	162971001	253995014
Non specific viral rash	other	A57z-1	A57z.11	587311000006114	186504007	286679010
Obstetric nonpurulent mastitis with postnatal complication	Puerperal	L4524	L452400	269291000006114	200385001	307962012
Myelitis	Neuro	F03-2	F03..12	69009019	41370002	69009019
Encephalomyelitis	Neuro	F03-1	F03..11	104625019	62950007	104625019
Unspecified ophthalmic herpes	other	A5440	A544000	406259010	186542001	286746015
Cellulitis and abscess of shoulder	Cellulitis	M0330	M033000	308327014	200666007	308327014
Vincent's angina	bacterial URTI	AA1	AA1..00	2470021018	399050001	1773291012
Tuberculous adenitis	other	A1722	A172200	18908019	10893003	18908019
Gonococcal septicaemia	other	A98yz-2	A98yz12	495793016	5085001	495793016
Acute viral laryngitis unspecified	Viral URTI	H040w	H040w00	301063013	441551009	2816881017
Tuberculosis of hilar lymph nodes	other	A1210	A121000	123534017	74387008	123534017
Acute secretory otitis media	bacterial URTI	F5100-1	F510011	473798017	359609001	473798017
Viral pneumonia	pneumonia	H20	H20..00	125510013	75570004	125510013
Hepatitis unspecified NOS	other	J633z	J633z00	303509012	128241005	206503018
Cellulitis of floor of mouth	Cellulitis	J0830	J083000	302270018	196538002	302270018
Chronic mastoiditis	bacterial URTI	F531	F531.00	133785015	80645004	133785015
Atypical pneumonia	pneumonia	H28	H28..00	350051017	233606009	350051017
Rheumatic chorea	Cardiovascular	G02	G02..00	78053017	46826000	78053017
Hydatid disease	other	AC2-1	AC2..11	124462015	74942003	124462015
Eczema herpeticum - Kaposi's varicelliform eruption	other	A540	A540.00	286729018	186535001	286729018
Viral encephalitis NOS	Neuro	A4zz-1	A4zz.11	61171000006112	34476008	57546016
Subacute bacterial endocarditis - SBE	Cardiovascular	G5101	G510100	122761000006114	73774007	122517018
Escherichia coli gastrointestinal tract infection	Gastrointestinal	A070	A070.00	365279016	111839008	365279016
Pneumococcal infection	other	A3B2	A3B2.00	28477017	16814004	28477017
Enteritis due to specified virus	other	A076	A076.00	395321010	266079003	395321010
Measles complicated by meningitis	Neuro	A553	A553.00	286771017	186561002	286771017
Abscess of suppurative peritonitis	Peritonitis	J552-1	J552.11	353742019	235984009	353742019
Nonsuppurative otitis media + eustachian tube disorders	bacterial URTI	F51	F51..00	297571000006118	194237006	299008018
[X]Cellulitis of finger and toe	Cellulitis	M080	M080.00	399909011	19240003	32438017
Pneumonia due to staphylococcus	pneumonia	H224	H224.00	219971000006119	22754005	38198016
Salmonella infection NOS	Gastrointestinal	A02z	A02z.00	286084015	302231008	443816015
Coxsackie virus	other	A792	A792.00	599261000006113	186658007	286905019
Diverticular abscess	Diverticulitis	J513	J513.00	353440011	235774002	353440011
Cellulitis and abscess of finger and toe	Cellulitis	M02	M02..00	308266016	200628009	308266016
Urinary tract infection following delivery	UTI	L1666	L166600	305977017	199111004	305977017
Acute non suppurative otitis media	bacterial URTI	F510	F510.00	458531000006114	359609001	2670857015
Other acute osteomyelitis	Bone	N300	N300.00	2471514017	409780002	2471514017
Viral diseases with exanthem	other	A5	A5...00	61141000006116	186504007	286680013
Postmeasles otitis media	bacterial URTI	A552	A552.00	22934019	13420004	22934019
Coliform bacteria	other	A3By8	A3By800	128308014	87628006	145291019
Influenza like illness	Viral URTI	H27z-2	H27z.12	778711000006116	95891005	158839016
Acute wheezy bronchitis	pneumonia	H060-1	H060.11	411490016	275499005	411490016
Diarrhoea due to Campylobacter jejuni	Gastrointestinal	A0743-1	A074311	619811000006118	18081009	30543016
Sore throat NOS	Viral URTI	H02-1	H02..11	139761000006116	162397003	2164213014
Infection of obstetric surgical wound	Puerperal	L3945	L394500	307559016	200125006	307559016
Pneumonia or influenza NOS	pneumonia	H2z	H2z..00	301431011	195878008	301357010
Neonatal urinary tract infection	UTI	Q40y1	Q40y100	21171016	12301009	21171016
Acute lower respiratory tract infection	pneumonia	H062	H062.00	457801000006117	195742007	301131016
Chronic laryngitis NOS	Viral URTI	H16z	H16z.00	301248018	29951006	50120012
Herpesviral infection of perianal skin and rectum	other	A5414	A541400	286733013	186537009	286733013
Acute upper respiratory tract infection	Viral URTI	H051	H051.00	460751000006119	54398005	90415012
Cellulitis of leg	Cellulitis	M085	M085.00	357328011	449710006	2912869018
Viral upper respiratory tract infection NOS	Viral URTI	H05z-2	H05z.12	350040017	281794004	419887019
Acute pelvic inflammatory disease	Genital	K409	K409.00	355291010	237037006	355291010
Viral sore throat NOS	Viral URTI	H02-2	H02..12	61411000006110	195662009	301028015
Tuberculosis of bones and joints	Bone	N304-1	N304.11	82541000006118	35984006	60049017
Chronic otitis media with effusion, serous	bacterial URTI	F511	F511.00	555791000006118	81564005	504726015
Drainage of peritonsillar abscess	bacterial URTI	75311	7531100	1486215014	392233007	1486215014
Febrile cold	Viral URTI	H00-3	H00..13	667611000006110	82272006	504996015
Pleural abscess	pneumonia	H5010	H501000	301632010	196067009	301632010
Urinary tract infection complicating pregnancy	UTI	L1668	L166800	1490641019	307534009	1490641019
Clostridium difficile infection	Gastrointestinal	A3Ay2	A3Ay200	286580015	186431008	286580015
Salpingitis follicularis	Genital	K4016	K401600	109583017	65984002	109583017
Chronic epididymitis	Genital	K2415	K241500	354880015	236768005	354880015
Peritoneal abscess	Peritonitis	J5524	J552400	236021000006117	73962000	122825010
Female chlamydial pelvic inflammatory disease	Genital	K40y1	K40y100	304699015	198176005	304699015
Cutaneous cellulitis	Cellulitis	M08	M08..00	472876012	123951002	472876012
Bacterial meningitis	Neuro	F00	F00..00	158829010	95883001	158829010
Pseudomonas infection	other	A3B7	A3B7.00	1232458011	63398001	1232458011
Roseola infantum	other	A57y1-1	A57y111	90394014	54385001	90394014
Meningitis due to viral organisms EC	Neuro	F011	F011.00	706611000006119	58170007	96672018
American mountain tick fever	other	A6611	A661100	11701013	6452009	11701013
O/E - quinsy present	bacterial URTI	2DB5-1	2DB5.11	255675016	164255006	255675016
Syphilitic retrobulbar neuritis	other	A94y4	A94y400	60548015	36276008	60548015
Acute maxillary sinusitis	bacterial URTI	H010	H010.00	113403018	68272006	113403018
Recurrent wheezy bronchitis	pneumonia	H30-2	H30..12	183191000006115	195949008	301450011
Prostatitis and other inflammatory diseases of prostate	Genital	K21-1	K21..11	203441000006115	9713002	16976011
Cervicitis and endocervicitis	Genital	K420	K420.00	304726012	198199009	304726012
Respiratory TB not confirmed bact or histologically	other	A125	A125.00	168861000006111	186202007	286247011
Osteomyelitis, unspecified	Bone	N302-1	N302.11	360276014	111253001	178471017
Other mycobacterial diseases	other	A31	A31..00	286426014	88415009	508021014
O/E - follicular tonsillitis	bacterial URTI	2DB6	2DB6.00	255676015	164256007	255676015
Notification of whooping cough	bacterial URTI	65VA	65VA.00	264414014	170526005	264414014
Cellulitis in diabetic foot	Cellulitis	M0372	M037200	308360012	200687002	308360012
[X]Infection of caesarean section wound following delivery	Puerperal	Lyu6A	Lyu6A00	2475004013	24342007	481891018
Pyogenic arthritis, unspecified	Bone	N0106-1	N010611	359266017	239777004	359266017
Puerperal pyrexia NOS	Puerperal	L420z	L420z00	200791000006110	237348005	355727015
Acute salpingitis and oophoritis	Genital	K400	K400.00	396758017	266581008	396758017
Chronic cholecystitis	Hepatobiliary	J6510	J651000	35027015	20824003	35027015
Herpes gestationis	other	L169	L169.00	142732017	86081009	142732017
Campylobacter enteritis	Gastrointestinal	A0743-2	A074312	533191000006119	18081009	2920784014
Suspected UTI	UTI	1J4	1J4..00	459357017	314940005	3038119015
Cellulitis of foot	Cellulitis	M08B	M08B.00	206541013	128276007	206541013
Haemophilus influenzae infection	other	A3B5	A3B5.00	151462017	91428005	151462017
Acute serous otitis media	bacterial URTI	F5101	F510100	299014013	194240006	299013019
Puerperal septicaemia	Puerperal	L403	L403.00	483922014	2858002	483922014
Pneumococcal septicaemia	other	A382	A382.00	509175013	448421008	2900359016
Cellulitis of eyelid	Cellulitis	F4D14	F4D1400	347348011	231796003	347348011
Notification of scarlet fever	bacterial URTI	65V7	65V7.00	264410017	170523002	264410017
Cellulitis and abscess of leg excluding foot	Cellulitis	M036	M036.00	541011000006113	449702005	2912778018
Hepatitis in infectious mononucleosis	Hepatobiliary	J6312	J631200	820971000006110	302919001	2476427017
Drainage of quinsy	bacterial URTI	75311-1	7531111	1493925016	392233007	1493925016
Cellulitis of face	Cellulitis	M082	M082.00	308311019	200652002	308311019
Acute respiratory infections	Viral URTI	H0	H0...00	300997012	195647007	300997012
Subhepatic abscess	Hepatobiliary	J5520	J552000	120042012	72249004	120042012
Extradural intracranial abscess	Neuro	F0404	F040400	296920011	192743008	296920011
Meningococcal encephalitis	Neuro	F0330-1	F033011	30532012	18071005	30532012
Scarlet fever - scarlatina	bacterial URTI	A341	A341.00	154821000006118	30242009	50618013
Acute frontal sinusitis	bacterial URTI	H011	H011.00	150861013	91038008	150861013
HIV disease resulting in wasting syndrome	other	A789A	A789A00	2622348012	422003001	2622348012
Lung consolidation	pneumonia	H2600	H260000	512123013	95436008	512123013
E.coli infection	other	A3B4-1	A3B4.11	633521000006119	71057007	501779012
Epstein-Barr virus	other	A79y-1	A79y.11	63775011	240530001	360296018
Viral pericarditis NOS	Cardiovascular	G50z1-1	G50z111	350428012	70189005	116578018
Syphilis and other venereal diseases	other	A9	A9...00	395385015	8098009	14372016
Acute ulcerative tonsillitis	bacterial URTI	H032	H032.00	301037015	195668008	301037015
Streptococcal tonsillitis	bacterial URTI	A3403	A340300	69365016	41582007	69365016
Rheumatic carditis	Cardiovascular	N0420	N042000	39771016	23685000	39771016
Methicillin resistant staphylococcus aureus	other	A3B11	A3B1100	465611000000114	266096002	465611000000114
Charcot's arthropathy	other	N035-1	N035.11	473460018	359554008	473460018
Acute gonococcal endometritis	Genital	A9816	A981600	108487014	65295003	108487014
Cellulitis, external ear	Cellulitis	F5011-2	F501112	219471000000116	232214001	347928014
Plasmodium falciparum malaria, unspecified	other	A84X	A84X.00	225101000006119	62676009	104160014
Ophthalmic herpes zoster infection	other	A5323	A532300	44081000006115	87513003	145090014
Helicobacter pylori gastrointestinal tract infection	Gastrointestinal	A0745	A074500	451126011	307759003	451126011
Catarrh unspecified	Viral URTI	H120-1	H120.11	539481000006114	86094006	142764012
Influenza-like symptoms	Viral URTI	16L	16L..00	460161011	315642008	460161011
Chronic active hepatitis	Hepatobiliary	J6141	J614100	303401012	197284004	303401012
Acute pneumococcal bronchitis	pneumonia	H0606	H060600	301105018	195719000	301105018
Pyrexial cold	Viral URTI	H00-5	H00..15	195731000006118	82272006	504996015
Coxsackie pericarditis	Cardiovascular	A7421	A742100	46541012	27806003	46541012
Chlamydial infection	Genital	A78A	A78A.00	169750018	105629000	169750018
Human immunodeficiency virus infection	other	A788-1	A788.11	143288017	86406008	143288017
[X]Cellulitis of thumb	Cellulitis	M080-3	M080.13	370621000006115	19240003	32438017
Cytomegaloviral disease, unspecified	other	A785X	A785X00	607291000006115	28944009	48459015
Acute viral tonsillitis	Viral URTI	H036	H036.00	301046014	195676005	301046014
Salmonellosis	Gastrointestinal	A020-1	A020.11	443815016	302231008	443815016
Recurrent urinary tract infections	UTI	1AG	1AG..00	183161000006111	197927001	304319014
Chest infection - viral pneumonia	pneumonia	H20-1	H20..11	546491000006118	75570004	125510013
Shigellosis	Gastrointestinal	A03	A03..00	60387019	36188001	60387019
Herpangina	Viral URTI	A740	A740.00	286906018	186659004	286906018
Lobar pneumonia due to unspecified organism	pneumonia	H260	H260.00	301409015	278516003	415454018
Cellulitis of arm	Cellulitis	M088	M088.00	423153016	449671007	2912546011
Unspecified viral haemorrhagic fever	other	A78X	A78X.00	72501000006114	240523007	360282012
Chronic myringitis without mention of otitis media	bacterial URTI	F541	F541.00	148750016	89723004	148752012
Acute endometritis	Genital	K4100	K410000	112369011	67667007	112369011
Puerperal endometritis	Puerperal	L400	L400.00	37601018	22399000	37601018
Tuberculous pneumonia	pneumonia	A116	A116.00	132731014	80003002	132731014
Recurrent acute otitis media	bacterial URTI	F525	F525.00	299070012	194287004	299070012
Chronic pharyngitis and nasopharyngitis	Viral URTI	H12	H12..00	556121000006114	47841006	79723013
Pneumonia and influenza	pneumonia	H2	H2...00	301357010	195878008	301357010
Acute laryngotracheitis	bacterial URTI	H042	H042.00	107009017	64375000	107009017
Tracheopharyngitis	Viral URTI	H053	H053.00	301086018	195707008	301086018
Acute bacterial tonsillitis	bacterial URTI	H035	H035.00	301041016	195671000	301041016
Parvovirus infection	other	A796	A796.00	287061019	186748004	287061019
Acute haematogenous osteomyelitis	Bone	N300Z	N300Z00	311815017	203179003	311815017
Female gonococcal pelvic inflammatory disease	Genital	K44	K44..00	304781017	198242009	304781017
Acute gonococcal cystitis	UTI	A9811	A981100	41678019	24868007	41678019
O/E - consolidation	pneumonia	23E2-1	23E2.11	253996010	162971001	253996010
Cellulitis and abscess of leg	Cellulitis	M036-1	M036.11	399901014	449702005	2912778018
Staphylococcal scalded skin syndrome	Cellulitis	M15y0-2	M15y012	308711016	200946001	308711016
Cholangitis	Hepatobiliary	J661	J661.00	136680010	82403002	136680010
Diverticulitis NOS	Diverticulitis	J511z	J511z00	303146018	307496006	450775010
Diverticulitis of the colon	Diverticulitis	J5115	J511500	626651000006119	111359004	178595017
Cellulitis and abscess of nose	Cellulitis	M0301-1	M030111	541051000006114	267778006	399897015
Recurrent urinary tract infection	UTI	K1903	K190300	304319014	197927001	304319014
[D]Septic shock	other	R0555	R055500	317357011	76571007	127157017
Acute epiglottitis (non strep)	bacterial URTI	H043	H043.00	456591000006112	266337001	396088019
Other viral and chlamydial diseases	other	A7	A7...00	286857015	543791000000108	1212571000000110
Acute catarrhal laryngitis	Viral URTI	H0402	H040200	301054011	195682008	301054011
Acute suppurative otitis media tympanic membrane intact	bacterial URTI	F5200	F520000	460541000006114	14948001	1221147016
Subacute endometritis	Genital	K4105	K410500	304709018	198182008	304709018
Escherichia coli septicaemia	other	A3842	A384200	510257017	447899008	2900064010
Shigella flexneri (group B)	Gastrointestinal	A031	A031.00	286088017	85729005	142105015
Helicobacter gastritis	Gastrointestinal	J1544	J154400	222841000000112	89538001	148452011
Cellulitis and abscess of ankle	Cellulitis	M0364	M036400	308353018	200682008	308353018
Septicaemia due to streptococcus, group B	other	A3801	A380100	286484010	448419003	2900357019
Aspiration pneumonitis	pneumonia	H47-1	H47..11	242382011	155597006	242382011
Human papilloma virus infection	other	A79B	A79B.00	360298017	240532009	360298017
Acute purulent bronchitis	pneumonia	H0603	H060300	301103013	195717003	301103013
Acute tracheobronchitis	pneumonia	H0605	H060500	58909014	35301006	58909014
Adenovirus	other	A790	A790.00	461251000006118	25225006	42292019
Abscess of lung NOS	pneumonia	H530z	H530z00	301687011	73452002	121974010
Acute mastoiditis NOS	bacterial URTI	F530z	F530z00	299088016	386034005	1480221019
Toxic shock syndrome	other	A3Ay1	A3Ay100	31220015	18504008	31220015
Mastoiditis and related conditions	bacterial URTI	F53	F53..00	299078017	55996006	93133010
Throat infection - tonsillitis	bacterial URTI	H03-1	H03..11	100111000006119	17741008	29982014
Sepsis - puerperal	Puerperal	L40-1	L40..11	148801000006117	2858002	5835013
Necrotising fasciitis	Muscle	A3A6	A3A6.00	496327019	52486002	496327019
Meningitis - meningococcal	Neuro	F005	F005.00	710941000006112	192644005	296779018
Ovarian abscess	Genital	K4021	K402100	1233709015	7415003	1233709015
Herpetic gingivostomatitis	other	A542	A542.00	96292016	57920007	96292016
Other specified pneumonia or influenza	pneumonia	H2y	H2y..00	301430012	195878008	301357010
Systemic lupus erythematosus with pericarditis	Cardiovascular	N0004	N000400	453243010	309762007	453243010
Meningitis - viral NOS	Neuro	F011z	F011z00	399389016	58170007	96672018
Enteritis due to rotavirus	other	A0762	A076200	286172019	186150001	286172019
Chronic laryngitis and laryngotracheitis	Viral URTI	H16	H16..00	301241012	195810009	301241012
Herpetic vulvovaginitis	other	A5411	A541100	45851012	27420004	45851012
Tuberculous meningitis	Neuro	A130	A130.00	97107015	58437007	97107015
Meningitis - tuberculous	Neuro	F004	F004.00	710951000006114	58437007	97107015
Cerebral abscess	Neuro	F0400-1	F040011	100367013	60404007	100367013
Acute erythematous tonsillitis	bacterial URTI	H030	H030.00	301035011	195666007	301035011
Chronic gonococcal urethritis	UTI	A9821	A982100	74070015	44412000	74070015
Pneumonia - Legionella	pneumonia	H22y2	H22y200	219771000006116	195889001	301372014
Escherichia coli infection	other	A3B4	A3B4.00	501778016	71057007	501778016
Cellulitis and abscess NOS	Cellulitis	M03zz	M03zz00	308367010	70759006	117539013
Dengue haemorrhagic fever	other	A654-2	A654.12	612921000006114	20927009	480874010
Parapharyngeal abscess	bacterial URTI	H1y22	H1y2200	140751018	84889008	140751018
Lymphogranuloma venereum	other	A991	A991.00	287384018	186946009	287384018
Tuberculosis of bones and joints	Bone	N306	N306.00	311925011	38279006	64066010
Diverticulitis of the duodenum	Diverticulitis	J5110	J511000	485644015	33838003	485644015
Pseudomonas septicaemia	other	A3843	A384300	1217028013	448813005	2899974019
Pneumonia due to streptococcus	pneumonia	H223	H223.00	56816017	34020007	56817014
Tuberculous endometritis	Genital	A1671	A167100	59375015	35585004	59375015
Acute tracheitis without obstruction	bacterial URTI	H0410	H041000	106996011	64369009	106996011
Cystitis NOS	UTI	K15z	K15z.00	304209017	38822007	65119018
Slapped cheek syndrome	other	A570-2	A570.12	485932016	34730008	485932016
Meningitis due to enterovirus	Neuro	A42	A42..00	1225816018	28192008	1225816018
Post operative urinary tract infection	UTI	K1902	K190200	216611000006114	197926005	304318018
Respiratory syncytial virus infection	Viral URTI	A79A	A79A.00	92677014	55735004	92677014
Septicaemia due to enterococcus	other	A3804	A380400	454282018	310669007	454282018
Chronic nasopharyngitis	Viral URTI	H122	H122.00	79723013	47841006	79723013
Erythema chronicum migrans	other	AA41	AA41.00	648201000006115	69588003	1233178016
Tetanus	other	A37	A37..00	127672017	76902006	127672017
Influenza with bronchopneumonia	pneumonia	H2700	H270000	1229740013	41269000	1229740013
Malarial parasites	other	42YA	42YA.00	1485472010	1001511000000100	2555891000000110
UTI - urinary tract infection in pregnancy	UTI	L166z-1	L166z11	450823012	307534009	450823012
Chronic rhinitis NOS	Viral URTI	H120z	H120z00	301187012	86094006	142764012
Pharynx or nasopharynx abscess	bacterial URTI	H1y26	H1y2600	301300017	195836002	301300017
Pyonephrosis unspecified	Pyelonephritis	K10y2	K10y200	304086017	48631008	81033017
Herpes zoster with ophthalmic complication	other	A532	A532.00	286714015	186524006	286714015
Foot and mouth disease	other	A784	A784.00	505825017	266108008	395360012
Osteomyelitis, unspecified	Bone	N3020	N302000	311855015	60168000	99949018
Influenza with gastrointestinal tract involvement	Viral URTI	H27y1	H27y100	301423018	195929004	301423018
Multiple resistent staphylococcus aureus	other	A3B11-1	A3B1111	695141000006111	282028001	420206011
Salpingo-oophoritis unspecified	Genital	K4025	K402500	304667014	46536000	77563016
Acute pyelitis	Pyelonephritis	K1012	K101200	54753017	32801008	54753017
Acute rheumatic fever NOS	Cardiovascular	G0z	G0z..00	299578013	26424001	44256019
Rubella deafness	other	A5602	A560200	286780017	186570004	286780017
Tuberculous hydrothorax	pneumonia	A1202	A120200	40681016	24235005	40681016
Chronic pharyngitis NOS	Viral URTI	H121z	H121z00	301199017	140004	1284016
Helicobacter gastritis	Gastrointestinal	A0743-3	A074313	819571000006118	89538001	148452011
Cellulitis and abscess of umbilicus	Cellulitis	M0324	M032400	308321010	200660001	308321010
Cholera	Gastrointestinal	A00	A00..00	105789012	63650001	105789012
Other specified cellulitis and abscess	Cellulitis	M03y	M03y.00	308363014	70759006	117539013
Pyogenic arthritis, unspecified	Bone	N010y	N010y00	309463019	372939007	1211457012
Viral pneumonia NOS	pneumonia	H20z	H20z.00	301364012	75570004	125510013
Chronic mastoiditis NOS	bacterial URTI	F531z	F531z00	299090015	80645004	133785015
Male pelvic abscess	Peritonitis	J552B	J552B00	303259019	197180003	303259019
Acute cystitis	UTI	K150	K150.00	113331011	68226007	113331011
Rheumatic endocarditis NOS	Cardiovascular	G14z	G14z.00	395750017	48872007	81438018
Other viral exanthemata	other	A57	A57..00	286786011	49882001	83087015
Tuberculosis NOS	other	A1z	A1z..00	286338018	56717001	94320019
Pyometra unspecified	Genital	K41z4	K41z400	304723016	88981003	147534012
Streptococcal septicaemia	other	A380	A380.00	484332018	448418006	2900355010
Chronic laryngitis	Viral URTI	H160	H160.00	50120012	29951006	50120012
Unspecified taeniasis	other	AC33	AC33.00	287789013	76172008	126503012
Viral diarrhoea	other	A076-1	A076.11	365357012	111843007	365357012
Legionella	pneumonia	A3A4	A3A4.00	13423018	26726000	44737013
Cellulitis and abscess of submandibular region	Cellulitis	M0303	M030300	308308015	200649005	308308015
Renal abscess	Pyelonephritis	K1020	K102000	6605011	3321001	6605011
Enteritis due to specified virus NOS	other	A076z	A076z00	286173012	266079003	395321010
Genitourinary tract infection in pregnancy - not delivered	UTI	L1663	L166300	305974012	199108000	305974012
Intraspinal abscess	Neuro	F041	F041.00	3482014	1427008	3482014
Cellulitis and abscess of forehead	Cellulitis	M0304	M030400	308309011	200650005	308309011
Chronic hepatitis NOS	Hepatobiliary	J614z	J614z00	303410016	76783007	127487019
Major puerperal infection NOS	Puerperal	L40z	L40z.00	730421000006119	2858002	5833018
Obstetric breast abscess with postnatal complication	Puerperal	L4514	L451400	307951012	200377005	307951012
Cellulitis and abscess of chin	Cellulitis	M0302	M030200	308307013	200648002	308307013
Chronic hypertrophic rhinitis	Viral URTI	H1202	H120200	301181013	195768000	301181013
Purulent otitis media NOS	bacterial URTI	F524	F524.00	299068015	39288006	65880011
Buruli ulcer	other	A311-1	A311.11	26848015	15845006	26848015
Schistosoma haematobium	other	AC00	AC00.00	6558010	3294004	6558010
Anthrax	other	A22	A22..00	2471280015	409498004	2471280015
Acute pelvic inflammatory disease	Genital	K406-1	K406.11	459231000006118	237037006	355291010
Other upper respiratory infections of multiple sites	Viral URTI	H05y	H05y.00	301090016	54150009	89996011
Genitourinary tract infection in pregnancy NOS	UTI	L166z	L166z00	398349016	267204006	2470152015
Cellulitis and abscess of heel	Cellulitis	M0371	M037100	308359019	200686006	308359019
Recurrent cholangitis	Hepatobiliary	J6612	J661200	17750014	10184002	17750014
Parametritis and pelvic cellulitis unspecified	Genital	K405	K405.00	304684015	280486004	418100014
Tuberculous bronchiectasis	pneumonia	A115	A115.00	38677017	23022004	38677017
Obstetric nonpurulent mastitis unspecified	Puerperal	L4520	L452000	269271000006113	271372000	406118014
Osteomyelitis, unspecified	Bone	N302N	N302N00	311877016	203229009	311877016
Other obstetric breast infections	Puerperal	L45y	L45y.00	307964013	200364001	307933011
Acute ethmoidal sinusitis	bacterial URTI	H012	H012.00	112674013	67832005	112674013
Acute cholecystitis NOS	Hepatobiliary	J650z	J650z00	303580014	65275009	108454010
Bordetella parapertussis	bacterial URTI	A331	A331.00	43868014	27836007	46586010
Influenza with laryngitis	Viral URTI	H2710	H271000	301416019	195923003	301416019
Other suppurative peritonitis NOS	Peritonitis	J552z	J552z00	303265019	235983003	353740010
Yaws gummata and ulcers	other	AA24	AA24.00	287444011	186968004	287444011
Actinomycotic infections	other	A39	A39..00	455081000006110	11817007	20392016
Influenza with pneumonia	pneumonia	H270	H270.00	778871000006116	195878008	301357010
Bacterial infection NOS	other	A3Bz	A3Bz.00	286627014	87628006	145296012
Thorax abscess NOS	pneumonia	H5011	H501100	301633017	128477000	474437019
Viral vomiting	other	A076-2	A076.12	365356015	111843007	365356015
Genital herpes unspecified	other	A5410	A541000	406258019	33839006	56485016
Other acute osteomyelitis	Bone	N3008	N300800	311790018	409780002	2471514017
Acute bacterial tonsillitis NOS	bacterial URTI	H035z	H035z00	301044012	195671000	301041016
Acute sanguinous otitis media	bacterial URTI	F5103	F510300	128622017	77478005	503588013
Aseptic meningitis	Neuro	A42z-1	A42z.11	443231016	301770000	443231016
Genitourinary tract infection in pregnancy - delivered	UTI	L1661	L166100	305972011	199106001	305972011
Cellulitis and abscess of temple region	Cellulitis	M0305	M030500	308310018	200651009	308310018
Acute appendicitis with appendix abscess	Peritonitis	J201	J201.00	396348018	266439004	396348018
Other acute osteomyelitis	Bone	N3006	N300600	311785016	203153007	311785016
Inflammatory conditions of jaws	Bone	J0645	J064500	64096017	38297003	64096017
Vincent's laryngitis	bacterial URTI	AA1z-1	AA1z.11	348220011	232427004	348220011
Other viral exanthemata NOS	other	A57z	A57z.00	395352011	49882001	83086012
Chronic gonococcal salpingitis	Genital	A9837	A983700	89006018	53529004	89006018
PID	Genital	K40z-1	K40z.11	304642011	198130006	304641016
Staphylococcal septicaemia	other	A381	A381.00	365023014	447894003	2900059011
Acute laryngitis and tracheitis NOS	Viral URTI	H04z	H04z.00	301082016	276443001	1489963015
Chronic infective rhinitis	Viral URTI	H1204	H120400	301183011	195770009	301183011
Colitis - giardial	other	A061-1	A061.11	572031000006114	10679007	306996014
Acute paralytic non-bulbar poliomyelitis	other	A401	A401.00	286639018	186476008	286639018
Cellulitis and abscess of breast	Cellulitis	M0321	M032100	308318013	200657008	308318013
Streptococcal sore throat with scarlatina NOS	bacterial URTI	A34z	A34z.00	286458016	186357007	286453013
Madura foot - actinomycosis	other	A394	A394.00	719111000006116	186397005	286527019
Trench mouth	bacterial URTI	AA1-1	AA1..11	1786648011	399050001	1786648011
Osteomyelitis, unspecified	Bone	N302X	N302X00	311886014	203238006	311886014
Streptococcal sore throat NOS	bacterial URTI	A340z	A340z00	286457014	43878008	73157016
Primary tuberculous complex	other	A100	A100.00	146495016	88356006	146495016
Arthropathy associated with other viral diseases	other	N015	N015.00	309522010	239780003	359269012
Obstetric breast infection NOS with postnatal complication	Puerperal	L45z4	L45z400	307976013	200364001	307933011
Chest infection - unspecified bronchopneumonia	pneumonia	H25-1	H25..11	546481000006116	396285007	1776258010
Cellulitis of penis	Cellulitis	K2723	K272300	25168017	14812002	25168017
Acute tracheitis NOS	bacterial URTI	H041z	H041z00	301068016	26650005	44623012
Paratyphoid fever A	Gastrointestinal	A011	A011.00	243871000006119	76623002	1234010014
Mumps orchitis	Genital	A720	A720.00	130398014	78580004	130398014
Tuberculosis of lung with cavitation	pneumonia	A112	A112.00	286219012	186177005	286219012
ECHO virus	other	A791	A791.00	635741000006117	271532008	406342015
Tuberculosis - lupus vulgaris	other	A1701	A170100	89011000006116	10528009	18298019
Influenza NOS	Viral URTI	H27z	H27z.00	396106019	6142004	11203012
Proteus infection	other	A3B6	A3B6.00	286589019	186437007	286589019
Ornithosis - psittacosis	pneumonia	A73	A73..00	41431000006111	75116005	124763014
Miliary tuberculosis	other	A18	A18..00	79348014	47604008	79348014
Purulent mastitis - obstetric	Puerperal	L451-1	L451.11	194931000006115	274131006	409895014
Specific viral infections	other	A79	A79..00	287050010	186741005	287050010
Tropical eosinophilia	other	H5831	H583100	2579261014	278484009	2579261014
Chronic atrophic rhinitis	Viral URTI	H1203	H120300	301182018	195769008	301182018
Other disease conjunctiva due to viruses and chlamydiae NEC	other	A77	A77..00	32831000006117	186673008	286929014
Herpetic ulceration of vulva	other	A5412	A541200	99366010	59819007	99366010
Osteomyelitis, unspecified	Bone	N302Y	N302Y00	311887017	203239003	311887017
Other cellulitis and abscess	Cellulitis	M03	M03..00	399894010	70759006	117539013
TB - tuberculosis notification	other	65V9-1	65V9.11	264413015	170525009	264413015
Cellulitis of skin area excluding digits of hand or foot	Cellulitis	M03-3	M03..13	357316015	238395006	357316015
Gastrointestinal tract infection specified organism NOS	Gastrointestinal	A07z	A07z.00	799701000006116	128398001	206697016
Chlamydia cervicitis	Genital	K4209	K420900	550681000006117	237084006	355365012
Arthritis due to rubella	Bone	A56x0	A56x000	1222298017	19431000	1222298017
Abscess of appendix	Peritonitis	J201-1	J201.11	103411019	62224002	103411019
Streptococcal laryngitis	bacterial URTI	A3401	A340100	141055011	85083002	141055011
Tuberculous fibrosis of lung	pneumonia	A114	A114.00	149374011	90117007	149374011
Meningococcal pericarditis	Cardiovascular	A3641	A364100	110818011	66704002	110818011
Helminthiases	other	AC	AC...00	819761000006117	27601005	46188015
Candidal urethritis	UTI	K172	K172.00	304276013	197903003	304276013
Oth streptococcus/cause/diseases classified/oth chapters	other	A3BX5	A3BX500	39931000006117	40733004	492755015
Vincent's tonsillitis	bacterial URTI	AA1z-2	AA1z.12	348206016	232417005	348206016
Acute salpingo-oophoritis	Genital	K4002	K400200	396757010	266581008	396757010
TB - acute pericarditis	other	G5003-1	G500311	299883012	194908003	299883012
Viral headache	other	1B1G1	1B1G100	252948015	162211001	252948015
Infantile viral gastroenteritis	other	A07y1	A07y100	451427012	308119005	451427012
Chlamydial pneumonia	pneumonia	H233	H233.00	350054013	233609002	350054013
Streptococc,group B/cause/disease classified/oth chapters	other	A3BX2	A3BX200	128751000006114	85769006	142172016
Herpesviral vesicular dermatitis	other	A54x3	A54x300	286757013	186552002	286757013
Tuberculous mastoiditis	Bone	A154	A154.00	118567019	71375000	118567019
Acute bronchiolitis with bronchospasm	pneumonia	H0612	H061200	25801011	15199004	25801011
Meningococcal optic neuritis	Neuro	A36y0	A36y000	121943013	73431005	121943013
Toxic liver disease with chronic persistent hepatitis	Hepatobiliary	J6353	J635300	303515012	197359004	303515012
Cellulitis of axilla	Cellulitis	M08A	M08A.00	32771017	19457002	32771017
Anogenital herpesviral infection	other	A5415	A541500	286734019	186538004	286734019
Adenovirus/cause of diseases classified to other chapters	other	A7y0X	A7y0X00	461271000006111	40733004	492755015
Chronic gonococcal cervicitis	Genital	A9835	A983500	127515016	76802005	127515016
Chest infection - unspecified bronchitis	pneumonia	H30-1	H30..11	350041018	32398004	54101019
Chronic catarrhal laryngitis	Viral URTI	H1601	H160100	301243010	195812001	301243010
Pyogenic arthritis, unspecified	Bone	N0105-1	N010511	1229173011	372941008	1229173011
Cellulitis of lip	Cellulitis	J0851	J085100	85030014	51030006	85030014
Pyogenic arthritis, unspecified	Bone	N0102-1	N010211	359268016	239779001	359268016
Major puerperal infection	Puerperal	L40	L40..00	66843013	2858002	5835013
Orofacial sinus	Cellulitis	J054	J054.00	415942013	278895007	415942013
Acute cervicitis	Genital	K4202	K420200	32509017	19272000	32509017
Acute bacterial pharyngitis	bacterial URTI	H023	H023.00	301024018	195658003	301024018
Acute bronchiolitis NOS	pneumonia	H061z	H061z00	301130015	5505005	10187013
Acute gonococcal prostatitis	Genital	A9812	A981200	178998013	111806005	178998013
Chronic osteomyelitis with draining sinus	Bone	N301M	N301M00	359778017	240152003	359778017
Other chronic osteomyelitis	Bone	N301-3	N301.13	149731000006114	40970001	68341014
[X]Other streptococcal arthritis and polyarthritis	Bone	Nyu00	Nyu0000	312510018	51646002	86010019
[D]Unspecified bacteraemia	other	R106	R106.00	317665015	5758002	497929016
[V]Typhoid carrier	other	ZV021	ZV02100	460186019	170484009	264362019
Staphylococ aureus/cause/diseases classified/oth chapters	other	A3BX7	A3BX700	125301000006119	56038003	93212013
Acute otitis media with effusion	bacterial URTI	F5100	F510000	58707018	270490007	405109018
Acute bronchiolitis due to respiratory syncytial virus	pneumonia	H0615	H061500	301128017	195739001	301128017
Streptococc,gp A/cause/disease classified/to oth chapters	other	A3BX1	A3BX100	128741000006112	40733004	492755015
Mumps pancreatitis	other	A723	A723.00	18532015	10665004	18532015
Antritis - acute	bacterial URTI	H010-1	H010.11	488101000006116	68272006	500974018
Salmonella septicaemia	Gastrointestinal	A021	A021.00	495504016	449083008	2898810014
Acute laryngopharyngitis	Viral URTI	H050	H050.00	92029013	55355000	92029013
Herpes zoster ophthalmicus	other	A5324	A532400	145090014	87513003	145090014
Other specified pulmonary tuberculosis	pneumonia	A11y	A11y.00	286221019	154283005	239551014
Acute dry pleurisy	pneumonia	H5103	H510300	301647018	196077006	301647018
Chronic gonococcal prostatitis	Genital	A9832	A983200	101175019	60893000	101175019
Acute pansinusitis	bacterial URTI	H01y0	H01y000	9421011	5028002	9421011
Fitzhugh Curtis syndrome	Hepatobiliary	A98y6	A98y600	761111000006116	237041005	355298016
Chest infection - pnemonia due to unspecified organism	pneumonia	H26-1	H26..11	546441000006110	312342009	456043010
Hepatitis non A non B	Hepatobiliary	A7054	A705400	821081000006115	186634008	286874015
Croup	Viral URTI	H0432-1	H043211	1001621000006110	71186008	118208010
Clostridium infection	Muscle	A3A0-1	A3A0.11	569571000006118	56688005	94268010
Tuberculous episcleritis	other	A1731	A173100	139795018	84288007	139795018
Nipple infection - obstetric	Puerperal	L450-2	L450.12	398455010	267289003	398455010
Diverticulitis unspecified	Diverticulitis	J511y	J511y00	303145019	307496006	450775010
Sweating fever	other	A782	A782.00	286978016	186694006	286978016
Lung echinococcus granulosus	pneumonia	AC21	AC21.00	732651000006112	75388006	125210014
Salpingitis and oophoritis unspecified	Genital	K402	K402.00	304664019	46536000	77563016
Clostridium perfringens food poisoning	Gastrointestinal	A042	A042.00	569601000006113	70014009	3028049014
Acute gonococcal epididymo-orchitis	Genital	A9813	A981300	50480018	30168008	50480018
Postmeasles encephalitis	Neuro	A550	A550.00	179037014	111872008	2547664012
Acute tonsillitis NOS	bacterial URTI	H03z	H03z.00	301049019	17741008	29982014
Other acute osteomyelitis	Bone	N3005-1	N300511	823741000006111	287052003	3286671018
Unspecified viral hepatitis	Hepatobiliary	A70z	A70z.00	286882015	3738000	7302012
Sepsis NOS following abortion/ectopic/molar pregnancy	other	L090y	L090y00	148811000006119	198609003	305277014
Tuberculoid leprosy (type T)	other	A301	A301.00	88931000006118	70143003	1233225012
Orchitis unspecified	Genital	K2402	K240200	304422010	274718005	410561019
Acute bronchitis NOS	pneumonia	H060z	H060z00	301122016	10509002	18268014
Rat-bite Streptobacillary fever	other	A261	A261.00	192081000006114	52138004	496219013
Sydenham's chorea	Cardiovascular	G02-1	G02..11	78055012	46826000	78055012
Meningococcal encephalitis	Neuro	A361	A361.00	706711000006110	18071005	30532012
Pyosalpinx	Genital	K4020-1	K402011	1777414016	397810006	1777414016
Measles with no complication NOS	other	A55z	A55z.00	286776010	111873003	179038016
Other specified zoonotic bacterial disease	other	A27y	A27y.00	286415015	23002003	38644016
Tuberculous laryngitis	other	A123	A123.00	116837013	70341005	116837013
Osteomyelitis	Bone	N30	N30..00	40691000006117	111253001	178471017
Obstetric breast abscess	Puerperal	L451	L451.00	405132019	270502007	405132019
Acute suppurative otitis media NOS	bacterial URTI	F520z	F520z00	299066016	194281003	299061014
Acute nonsuppurative otitis media NOS	bacterial URTI	F510z	F510z00	458581000006110	359609001	2670857015
Obstetric nonpurulent mastitis	Puerperal	L452	L452.00	220901000000117	271372000	406118014
Cellulitis and abscess of toe NOS	Cellulitis	M021z	M021z00	399892014	200638004	308282015
Cellulitis and abscess of face NOS	Cellulitis	M030z	M030z00	308312014	200645004	308300010
Varicella with other specified complications	other	A52x	A52x.00	286693015	23737006	39855010
Shigella dysenteriae (group A)	Gastrointestinal	A030	A030.00	395315011	43612004	72718012
Viral gastroenteritis	other	A0821-1	A082111	179018017	111843007	179018017
Genital herpes simplex NOS	other	A541z	A541z00	286737014	33839006	56485016
Obstetric nonpurulent mastitis - delivered	Puerperal	L4521	L452100	269251000006115	200381005	307957011
African tick virus	other	A8210	A821000	473351000006119	186774005	287102014
Acute suppurative otitis media tympanic membrane ruptured	bacterial URTI	F5201	F520100	460551000006111	86279000	1235118013
Bilateral suppurative otitis media	bacterial URTI	F5240	F524000	299069011	194286008	299069011
Vincent's gingivitis	bacterial URTI	AA11	AA11.00	267378012	399050001	1786651016
Acute female pelvic peritonitis	Peritonitis	K4060	K406000	141009014	85051008	141009014
Viral diseases with exanthemata NOS	other	A5z	A5z..00	286799014	186504007	286680013
Acute mucoid otitis media	bacterial URTI	F5102	F510200	87124011	52353000	1231111010
Chronic obstruct pulmonary dis with acute lower resp infectn	pneumonia	H3y0	H3y0.00	555461000006119	196001008	301542016
Herpes zoster with unspecified complication	other	A53y	A53y.00	286722010	49183009	81927012
Acute respiratory infection NOS	Viral URTI	H0z	H0z..00	301145010	195647007	2817368013
Salivary gland virus disease	other	A785-1	A785.11	48462017	28944009	48462017
Acute croupous bronchitis	pneumonia	H0604	H060400	2475602011	195714005	2475602011
Chronic pyelitis	Pyelonephritis	K1002	K100200	304062019	197762003	304062019
Abscess of lung and mediastinum	pneumonia	H53	H53..00	301680013	196107009	301680013
Cellulitis of dorsum of hand	Cellulitis	M0340-3	M034013	357317012	238396007	357317012
Herpes simplex viral infection	other	A54-1	A54..11	508112010	88594005	508112010
Pharyngotracheitis	Viral URTI	H052	H052.00	301087010	195707008	301086018
Relapsing fever	other	A87	A87..00	2577732019	420079008	2577732019
Herpes zoster NOS	other	A53z	A53z.00	286723017	4740000	8902018
Acute ulcerative pharyngitis	Viral URTI	H022	H022.00	301023012	195657008	301023012
Acute haemophilus influenzae bronchitis	pneumonia	H0608	H060800	301108016	195721005	301108016
Chlamydial epididymitis	Genital	K2416	K241600	354879018	236767000	354879018
Granular pharyngitis	Viral URTI	H1212	H121200	481674019	2365002	481674019
Cellulitis and abscess of nose (external)	Cellulitis	M0301	M030100	399897015	267778006	399897015
Herpetic infection of penis	other	A5413	A541300	17818010	10227000	17818010
Other osteomyelitis	Bone	N302b	N302b00	105352012	63375009	105352012
Hyperkeratosis due to yaws	other	AA23	AA23.00	222941000000115	53734002	89323017
Inflammatory conditions of jaws	Bone	J064-2	J064.12	220981000000110	87415007	144930019
Chlamydial infection of lower genitourinary tract	other	A78A0	A78A000	287036017	186729003	287036017
Meningococcal meningitis with acute meningococcal septicaem	Neuro	A365	A365.00	705871000006118	313437008	457331011
Trichomonal urethritis	UTI	AD102	AD10200	50395017	30116001	50395017
Streptococ pneumon/cause/disease classified/oth chapters	pneumonia	A3BX4	A3BX400	128731000006119	16814004	28474012
Primary tuberculous infection	other	A10	A10..00	105237015	63309002	105237015
Septicaemia of newborn	other	Q40y2	Q40y200	492921010	206376005	316478018
Bacillary dysentery Shigella sonnei	Gastrointestinal	A033-1	A033.11	501911000006117	4298009	8235019
Herpes simplex whitlow	other	A546	A546.00	493704017	43891009	493704017
Cytomegaloviral mononucleosis	other	A751	A751.00	27407018	16196000	27407018
Plasmodium vivax malaria without complication	other	A841X	A841X00	225141000006117	27052006	45254014
Notification of malaria	other	65V4	65V4.00	264407012	170520004	264407012
Enterovirus infection, unspecified	other	A79X	A79X.00	646011000006111	53648006	89193019
Tuberculosis of bones and joints	Bone	A15-1	A15..11	83161000006116	58764007	97655016
Acute laryngitis NOS	Viral URTI	H040z	H040z00	301065018	6655004	12028011
Chest infection - other bacterial pneumonia	pneumonia	H22-1	H22..11	1222332017	53084003	88303013
Bronchiolitis obliterans organising pneumonia	pneumonia	H564	H564.00	474828010	719218000	3525380019
[D]Septicaemic shock	other	R0555-1	R055511	1216110018	76571007	1216933018
Bacterial pneumonia NOS	pneumonia	H22z	H22z.00	301376012	53084003	88303013
Other specified viral or chlamydial diseases	other	A7y	A7y..00	287073019	543791000000108	1212571000000110
HIV p24 antigen level	other	4J35	4J35.00	1784247014	998711000000108	2581951000000110
Trachoma - active stage	other	A761	A761.00	93121000006114	52812002	87878014
Hypostatic pneumonia	pneumonia	H5400	H540000	141663013	85469005	141663013
Fallopian tube abscess	Genital	K4020	K402000	1786208014	398319002	1786208014
Orchitis NOS	Genital	K240z	K240z00	304425012	274718005	410561019
Elephantiasis-non filarial-NOS	other	G861-1	G861.11	638601000006116	234097001	350731012
Gonococcal infection of musculoskeletal system	Bone	A9850	A985000	74641011	44743006	74641011
Genital chancre	other	A910-1	A910.11	287223013	186847001	287223013
Tuberculous arthritis	Bone	A152	A152.00	28980013	17136009	1221477016
Coxsackie myocarditis	Cardiovascular	A7423	A742300	62085014	37217002	62085014
Syphilitic aortitis	other	A931	A931.00	34885019	20735004	34885019
Acute gonorrhoea of lower genitourinary tract	other	A980	A980.00	497063017	54825009	497063017
Intracranial or intraspinal abscess NOS	Neuro	F04z	F04z.00	296929012	192737006	296909011
Tuberculous pleurisy	pneumonia	A120	A120.00	286225011	186182003	286225011
Pleurisy without effusion or active tuberculosis	pneumonia	H510	H510.00	301646010	196076002	301646010
Infective/parasitic disease in preg/childbirth/puerperium	Puerperal	L17	L17..00	306026017	199153003	306026017
Influenza with respiratory manifestations NOS	Viral URTI	H271z	H271z00	301418018	6142004	11203012
Falciparum malaria - malignant	other	A840	A840.00	1232370014	62676009	1232370014
Pneumonia due to klebsiella pneumoniae	pneumonia	H220	H220.00	107173015	64479007	107173015
Chronic persistent hepatitis	Hepatobiliary	J6140	J614000	69895016	41889008	69895016
Cellulitis and abscess of flank	Cellulitis	M0325	M032500	308322015	200661002	308322015
Other typhus	other	A81	A81..00	287086011	240613006	360416019
Other acute osteomyelitis	Bone	N3000	N300000	311775017	409780002	2471514017
Cellulitis and abscess of hand NOS	Cellulitis	M034z	M034z00	308343019	62837005	104432017
Pseudocowpox - Milker's node	other	A511	A511.00	198251000006113	27240009	45541015
Acute rheumatic pancarditis	Cardiovascular	G01y0	G01y000	106492016	64072006	106492016
Purulent myositis	Muscle	N230-1	N230.11	50767015	30330001	50767015
Yellow fever	other	A60	A60..00	27986016	16541001	27986016
Other specified acute respiratory infections	Viral URTI	H0y	H0y..00	301144014	195647007	300997012
Subacute osteomyelitis	Bone	N309	N309.00	111860018	67322009	111860018
Pneumonia with varicella	pneumonia	H24y7	H24y700	220251000006118	195911009	301399011
AIDS carrier	other	65QA	65QA.00	264371011	699433000	2984517011
Acquired immune deficiency syndrome	other	A788	A788.00	103844015	62479008	103844015
Renal and perinephric abscess	Pyelonephritis	K102	K102.00	304072016	197772000	304072016
Rubella encephalomyelitis	Neuro	A5601	A560100	206414018	128191000	206414018
Actinomycetoma	other	AB640	AB64000	287682012	187089001	287682012
Septicaemia NOS following abortive pregnancy	other	L090z	L090z00	305550018	609485004	2966729010
Renal tuberculosis	other	A160-1	A160.11	73939018	44323002	73939018
HIV disease resulting in candidiasis	other	A7892	A789200	287025012	81000119104	2967570018
Bazin's disease - erythema induratum - TB hypersensitivity	other	A1710	A171000	504231000006117	2028007	4502016
E.coli septicaemia	other	A3842-1	A384211	633541000006114	447899008	2900064010
Other viral or chlamydial disease NOS	other	A7z	A7z..00	287082013	543791000000108	1212571000000110
Osteomyelitis of vertebra	Bone	N302a	N302a00	311889019	203241002	311889019
Late effects of acute poliomyelitis	other	AE1	AE1..00	348287011	110270004	348287011
Syphilitic saddle nose	other	A9052	A905200	129090011	77782006	129090011
Streptococcal angina	bacterial URTI	A3400	A340000	73160011	43878008	73160011
Chronic female pelvic cellulitis	Genital	K4040	K404000	304680012	198160001	304680012
Osteomyelitis, unspecified	Bone	N3027	N302700	311862012	28769004	48174014
Chest infection with infectious disease EC	pneumonia	H24-1	H24..11	546511000006112	195902009	301388014
Hypostatic bronchopneumonia	pneumonia	H5401	H540100	52762016	31561003	52762016
Tuberculosis of bone	Bone	N305	N305.00	311916017	203267007	311916017
Enteritis due to adenovirus	other	A0760	A076000	501712011	70880006	501712011
Other chronic osteomyelitis	Bone	N3017	N301700	400323013	268019002	400323013
Cellulitis and abscess of cheek (external)	Cellulitis	M0300	M030000	399895011	267777001	399895011
TB lung confirm sputum microscopy with or without culture	pneumonia	A1240	A124000	107761000006118	186193001	286237013
Pulmonary mycobacterium avium-intracellulare infection	pneumonia	A3100	A310000	1229247010	186342000	2840640011
Other acute osteomyelitis	Bone	N3007	N300700	400321010	268017000	400321010
Resp syncytial virus as cause of dis class to other chapters	Viral URTI	A7y02	A7y0200	175121000006114	186741005	287050010
Acute laryngotracheitis NOS	bacterial URTI	H042z	H042z00	301074016	64375000	107009017
Primary respiratory TB confirm bact and histologically	other	A1247	A124700	206221000006117	186201000	286246019
Herpes simplex with unspecified complication	other	A54y	A54y.00	286760018	111854002	179026013
Meningococcal meningitis with meningococcal septicaemia	Neuro	A366	A366.00	458426011	314130008	458426011
O/E - tonsils - quinsy present	bacterial URTI	2DB5	2DB5.00	255674017	164255006	255674017
Tuberculosis of bones and joints	Bone	A15-2	A15..12	82841000006116	190710003	293128014
Acute rheumatic pericarditis	Cardiovascular	G010	G010.00	26565015	15676002	26565015
Acute phlegmonous pharyngitis	Viral URTI	H021	H021.00	301022019	195656004	301022019
Chronic secretory otitis media, serous	bacterial URTI	F511-1	F511.11	504727012	81564005	504727012
Listerial endocarditis	Cardiovascular	A2704	A270400	286396016	186318004	286396016
O/E - granular pharyngitis	Viral URTI	2DC2	2DC2.00	255684016	164260005	255684016
Acute bacterial bronchitis unspecified	pneumonia	H060x	H060x00	301121011	233598009	350042013
Chronic viral hepatitis B with delta-agent	Hepatobiliary	A7070	A707000	353580016	235869004	353580016
Calculus of bile duct with cholangitis	Hepatobiliary	J646	J646.00	303568018	197402000	303568018
[V]Asymptomatic human immunodeficency virus infection status	other	ZV01A	ZV01A00	337231000006117	427921000000108	938141000000118
Chronic abscess of the pouch of Douglas	Genital	K4044	K404400	1235638013	91155009	1235638013
Cellulitis and abscess of head unspecified	Cellulitis	M03y0	M03y000	399904018	70759006	117539013
Cellulitis of trunk	Cellulitis	M083	M083.00	78133018	46876003	78133018
Chronic pyonephrosis	Pyelonephritis	K1003	K100300	304063012	197763008	304063012
Other specified shigella infection	Gastrointestinal	A03y	A03y.00	286094013	36188001	60387019
Cellulitis and abscess of digit NOS	Cellulitis	M02z	M02z.00	399893016	200628009	308266016
Herpes circinatus	other	AB05-1	AB05.11	140670018	84849002	1234986010
Pharynx or nasopharynx cellulitis	bacterial URTI	H1y21	H1y2100	230901000006114	23166004	38903015
Encephalitis, myelitis and encephalomyelitis	Neuro	F03	F03..00	399390013	267576008	399390013
Acute laryngotracheitis without obstruction	bacterial URTI	H0420	H042000	63301015	37948003	63301015
Herpes zoster with dermatitis of eyelid	other	A5320	A532000	286715019	186525007	286715019
Liver abscess due to cholangitis	Hepatobiliary	J6201	J620100	303471011	197327006	303471011
Seminal vesiculitis	Genital	K280	K280.00	45165011	27001009	45165011
Chronic simple laryngitis	Viral URTI	H1600	H160000	301242017	195811008	301242017
Varicella pneumonitis	pneumonia	A521	A521.00	301400016	195911009	301400016
Osteomyelitis, unspecified	Bone	N3026	N302600	311861017	60168000	99949018
Chlamydial infection of genitourinary tract, unspecified	other	A78AX	A78AX00	550821000006117	312099009	455763019
Acute and subacute bacterial endocarditis	Cardiovascular	G510	G510.00	395761013	266237004	395761013
Pfeiffer's disease	other	A752	A752.00	1225197013	271558008	1225197013
Epididymitis NOS	Genital	K241z	K241z00	304433013	31070006	52004013
Impetigo herpetiformis	other	M143	M143.00	308748013	65539006	108896015
Pneumonia due to other specified organisms	pneumonia	H23	H23..00	301377015	312342009	456043010
Cellulitis and abscess of lower leg	Cellulitis	M0363	M036300	308352011	200681001	308352011
Septicaemia due to streptococcus pneumoniae	other	A3803	A380300	454280014	448421008	2900359016
Other acute upper respiratory infections	Viral URTI	H05	H05..00	301083014	54398005	90415012
Chorioamnionitis	Puerperal	L284-2	L284.12	20065015	11612004	20065015
Acute oedematous laryngitis	Viral URTI	H0400	H040000	301052010	195680000	301052010
Cellulitis and abscess of finger NOS	Cellulitis	M020z	M020z00	308281010	200630006	308269011
Peritonitis - bacterial	Peritonitis	J5503	J550300	228991000006115	197171003	303244013
Ebola virus disease	other	A794	A794.00	61911010	37109004	61911010
pneumonitis	pneumonia	H357	H357.00	291961000006112	48347002	80553019
Klebsiella pneumoniae/cause/disease classifd/oth chapters	pneumonia	A3BXB	A3BXB00	754391000006117	40733004	492755015
Tuberculosis of peripheral lymph nodes NOS	other	A172z	A172z00	286314017	77038006	127902015
Chronic viral hepatitis	Hepatobiliary	A707	A707.00	17930015	10295004	17930015
Papillomavirus as cause of diseases classif to oth chapters	other	A7y05	A7y0500	250111000006114	186741005	287050010
Bile duct calculus with other cholecystitis	Hepatobiliary	J644	J644.00	303557018	30093007	50351011
HIV viral load	other	4J34	4J34.00	459601018	998701000000106	2581941000000110
Hepatitis B surface antig +ve	Hepatobiliary	43B4	43B4.00	820791000006114	165806002	257840015
Presence of virus	other	4JU	4JU..00	459354012	993851000000109	2559371000000110
Retropharyngeal abscess	bacterial URTI	H1y23	H1y2300	30574019	18099001	30574019
Peritonitis NOS	Peritonitis	J55z	J55z.00	303272018	48661000	81079010
Pericolic abscess	Peritonitis	J5528	J552800	303256014	197178009	303256014
Urban cutaneous leishmaniasis	other	A851	A851.00	492924019	41235001	492924019
Acute oophoritis	Genital	K4000	K400000	27896014	16486000	27896014
Cutaneous mycobacterial infections	other	A311-3	A311.13	1785006010	25626000	1785006010
Gas gangrene	Muscle	A3A05	A3A0500	133518010	80466000	133518010
Taenia saginata infection	other	AC32	AC32.00	114876011	69163003	114876011
Tuberculosis of epididymis	other	A164	A164.00	138730017	83652003	138731018
Geniculate herpes zoster	other	A5311	A531100	36819018	21954000	36819018
Other specified bacterial food poisoning	Gastrointestinal	A04y	A04y.00	286100011	66107000	109787018
Genitourinary tract infection in pregnancy unspecified	UTI	L1660	L166000	305971016	267204006	2470152015
Brain abscess	Neuro	F040-1	F040.11	100368015	60404007	100367013
Filariasis NOS	other	AC5z	AC5z.00	287812017	105706003	169827016
Clostridium perfringens infection	Muscle	A3A02-1	A3A0211	569611000006111	266093005	395340016
Pneumonia with pneumocystis carinii	pneumonia	H24y2	H24y200	220181000006118	415125002	2533522015
Rubella with no complication NOS	other	A56z	A56z.00	286785010	36653000	61155017
Female tuberculous pelvic inflammatory disease	Genital	K43	K43..00	304780016	198241002	304780016
Cellulitis of palm of hand	Cellulitis	M0340-4	M034014	357321017	238398008	357321017
Meningitis due to other organisms	Neuro	F01	F01..00	296804019	312216007	455890018
HIV disease resulting in Pneumocystis carinii pneumonia	pneumonia	A7893	A789300	825831000006113	420403001	2617400016
Granulomatous hepatitis, not elsewhere classified	other	J63X	J63X.00	806841000006117	86514004	143474019
Puerperal endometritis NOS	Puerperal	L400z	L400z00	307668013	22399000	37601018
Cellulitis of face	Cellulitis	M0306	M030600	541291000006111	200652002	308311019
Cellulitis and abscess of trunk	Cellulitis	M032	M032.00	308316012	200655000	308316012
Cellulitis and abscess of foot	Cellulitis	M037-1	M037.11	540851000006112	267783003	399903012
HIV disease resulting in Kaposi's sarcoma	other	A7895	A789500	825771000006119	420524008	2617386013
Cellulitis and abscess of forearm	Cellulitis	M0334	M033400	308331015	200670004	308331015
Cellulitis and abscess of hand excluding digits	Cellulitis	M034	M034.00	399899017	267780000	399899017
Chronic endometritis	Genital	K4110	K411000	106241010	63922003	106241010
Cellulitis - anus or rectum	Cellulitis	J54-1	J54..11	450686015	307424002	450686015
Chlamydial infection, unspecified	other	A78AW	A78AW00	550851000006114	105629000	169750018
Enteritis due to enterovirus	other	A0761	A076100	1227968013	32580004	1227968013
Acute uterine inflammatory disease	Genital	K410	K410.00	304707016	198180000	304707016
Malarial encephalitis	Neuro	F0320-1	F032011	730631000006118	53622003	89147017
Cellulitis of neck	Cellulitis	M089	M089.00	62096018	37223007	62096018
Epididymo-orchitis NOS	Genital	K242z	K242z00	304438016	197983000	2475615019
Empyema of mastoid	bacterial URTI	F530-2	F530.12	8694011	386034005	1480221019
Mumps meningitis	Neuro	F0114-1	F011411	73712019	44201003	73712019
Meningococcal arthropathy	Bone	A36y1	A36y100	16579010	9467007	16579010
Incision of retropharyngeal abscess	bacterial URTI	74232	7423200	267783019	172960003	267783019
Sleeping sickness	other	A86-1	A86..11	503961011	78940002	503961011
Intracranial and intraspinal abscesses	Neuro	F04	F04..00	296909011	192737006	296909011
Chronic simple rhinitis	Viral URTI	H1200	H120000	301176016	195765002	301176016
Haemophilus influenzae septicaemia	other	A3841	A384100	1206286018	447685007	2898280014
Mycobacterium marinum infection	other	A311-2	A311.12	683521000006112	25626000	1785006010
Other bacterial pneumonia	pneumonia	H22	H22..00	301368010	53084003	88303013
Argyll Robertson pupil	other	F4K44	F4K4400	490791000006111	4129001	8371016
Late latent syphilis	other	A96	A96..00	287293015	186903006	287293015
Acute peritonitis	Peritonitis	J553	J553.00	112270010	67602004	112270010
Faecal peritonitis	Peritonitis	J55y5	J55y500	353743012	235985005	353743012
Syphilis NOS	other	A97z	A97z.00	287300012	76272004	126672010
Female syphilitic pelvic inflammatory disease	Genital	K40y0	K40y000	304698011	198175009	304698011
Abscess of lung	pneumonia	H530	H530.00	121974010	73452002	121974010
Primary anal syphilis	other	A911	A911.00	51915015	31015008	51915015
Amoebic liver abscess	Hepatobiliary	A053	A053.00	124771013	75119003	124771013
Nocardiosis NOS	other	A39z1	A39z100	286535016	29227009	48908010
Cellulitis and abscess of foot NOS	Cellulitis	M037z	M037z00	308361011	267783003	399903012
Locomotor ataxia	other	A940-1	A940.11	736381000006110	316841006	461489010
Chest infection - pneumococcal pneumonia	pneumonia	H21-1	H21..11	546451000006112	266350000	396103010
Acute bronchitis due to parainfluenza virus	pneumonia	H060C	H060C00	456021000006115	195726000	301114011
[X]Cellulitis of breast	Cellulitis	M084	M084.00	308446011	75817003	125926017
Late effects of tuberculosis	other	AE0	AE0..00	287958017	187251001	287958017
Chest infection - influenza with pneumonia	pneumonia	H270-1	H270.11	546421000006115	195878008	301357010
Tuberculosis of mesenteric lymph glands	other	A14y3	A14y300	89521000006117	234090004	350724013
Prostatocystitis	UTI	K213	K213.00	112408019	67685000	112408019
Oophoritis unspecified	Genital	K4023	K402300	304665018	76047005	126311015
Morbilli	other	A55-1	A55..11	24144017	14189004	24144017
Shigellosis NOS	Gastrointestinal	A03z	A03z.00	286095014	36188001	60387019
Rabies - hydrophobia	other	A71	A71..00	395599015	266196000	395599015
Acute staphylococcal pharyngitis	bacterial URTI	H0231	H023100	301026016	195660001	301026016
Epididymo-orchitis unspecified	Genital	K2422	K242200	304436017	197983000	304417010
Other specific viral infection	other	A79y	A79y.00	395370014	186741005	287050010
Influenza with pharyngitis	Viral URTI	H2711	H271100	301417011	195924009	301417011
Acute bronchitis and bronchiolitis	pneumonia	H06	H06..00	301095014	195712009	2820607014
Measles with other specified complication NOS	other	A55xz	A55xz00	286774013	14189004	24142018
Other acute sinusitis	bacterial URTI	H01y	H01y.00	301013015	15805002	26785019
Osteomyelitis, unspecified	Bone	N3036	N303600	235361000006117	55083007	91574010
Arthritis in other bacterial diseases classified elsewhere	Bone	A0223	A022300	118420016	71299003	118420016
Plasmodium malariae malaria without complication	other	A84W	A84W.00	225121000006112	27618009	46225012
Herpes simplex no complication NOS	other	A54z	A54z.00	395351016	111853008	179025012
Mumps meningitis	Neuro	A721	A721.00	694551000006119	44201003	73712019
Septicaemia due to streptococcus, group A	other	A3800	A380000	286481019	449504009	2900360014
Scrum pox	other	A54-2	A54..12	360213013	240475000	360213013
Tick-borne fever	other	A661	A661.00	2536233012	10301003	17938010
Septicaemia due to Staphylococcus aureus	other	A3810	A381000	286497012	448417001	2900354014
Female pelvic peritonitis unspecified	Peritonitis	K4061	K406100	304692012	32923006	54954015
Abscess of mastoid	bacterial URTI	F530-1	F530.11	17974018	386034005	1480221019
[X]Cellulitis of other sites	Cellulitis	M08y	M08y.00	308453019	123951002	192440011
Endometritis following abortive pregnancy	Genital	L0900	L090000	305543017	198820000	305543017
Tuberculous keratoconjunctivitis	other	A1734	A173400	286321017	186267004	286321017
Drainage of retropharyngeal abscess	bacterial URTI	74261	7426100	267812011	172981003	267812011
Pneumonia with whooping cough	pneumonia	H243	H243.00	1231963019	59475000	1231963019
Chronic salpingitis and oophoritis	Genital	K401	K401.00	556601000006112	198142001	3005111017
Varicella with no complication NOS	other	A52z	A52z.00	286695010	38907003	65256015
Post operative chest infection	pneumonia	SP132	SP13200	216551000006114	448719004	2899355019
Chronic viral hepatitis C	Hepatobiliary	A7072	A707200	557071000006112	128302006	206586011
Pneumonia due to pseudomonas	pneumonia	H221	H221.00	69026013	41381004	69027016
Chest infection - pneumonia organism OS	pneumonia	H23-1	H23..11	1222333010	312342009	456043010
Tuberculosis of skin and subcutaneous tissue NOS	other	A170z	A170z00	286306011	271423008	406201015
Other specified viral hepatitis without coma	Hepatobiliary	A705	A705.00	286870012	3738000	7302012
Ritter's disease	Cellulitis	M15y0	M15y000	308714012	200946001	308714012
Tuberculosis of testis	other	A1652	A165200	63627011	40258005	63627011
Seminal vesiculitis unspecified	Genital	K2800	K280000	304509016	27001009	45165011
Pelvic cellulitis unspecified	Genital	K4051	K405100	304686018	280486004	418100014
Mycoplasma pneumoniae [PPLO] cause/dis classifd/oth chaptr	pneumonia	A3BXA	A3BXA00	683591000006114	406595002	2158243017
Epidural abscess	Neuro	F04z0	F04z000	103013011	61974008	103013011
Cellulitis and abscess of foot excluding toe	Cellulitis	M037	M037.00	399903012	267783003	399903012
Septic shock due to transfusion	other	SP380	SP38000	26714014	15765005	26714014
Pneumonia due to respiratory syncytial virus	pneumonia	H201	H201.00	301362011	195881003	301362011
Acute bacterial endocarditis	Cardiovascular	G5100	G510000	178506011	111286002	178506011
Epididymitis with abscess	Genital	K2410	K241000	120506013	72550000	120506013
Orchitis with abscess	Genital	K2400	K240000	42091000006114	95593001	512212019
Prostatitis in diseases EC	Genital	K214	K214.00	304390014	197963001	304390014
Fallopian tube tuberculosis	Genital	A1661-1	A166111	1230741010	49558004	1230741010
Yaws	other	AA2	AA2..00	117353012	70647001	117353012
Other specified bacterial diseases	other	A3y	A3y..00	286628016	87628006	145291019
Influenza with other manifestations NOS	Viral URTI	H27yz	H27yz00	301424012	6142004	11203012
Diverticulitis of the small intestine unspecified	Diverticulitis	J5113	J511300	303141011	56165008	93400012
Acute gonococcal cervicitis	Genital	A9815	A981500	35208019	20943002	35208019
Arthropod-borne viral diseases	other	A6	A6...00	493461000006117	40610006	67738017
Acute gonococcal salpingitis	Genital	A9817	A981700	75651017	45377007	75651017
Epidemic parotitis	other	A72z-1	A72z.11	1223203014	240526004	1223203014
Tuberculous peritonitis	Peritonitis	A140	A140.00	74349016	44572005	74349016
Iliopsoas abscess	Muscle	J552C	J552C00	396380016	266463007	396380016
Leprosy	other	A30	A30..00	134369019	81004002	134369019
Paratyphoid fever B	Gastrointestinal	A012	A012.00	243881000006116	71085009	1233347010
Peritonitis due to bile	Peritonitis	J55y3	J55y300	1228696018	36746002	1228696018
Tuberculosis of small intestine	other	A14y2	A14y200	20900014	12137005	20900014
Neurosyphilis	other	A94	A94..00	43626012	26039008	43626012
Tuberculosis verrucosa cutis	other	A1708	A170800	56584015	33893009	56584015
Subdural intracranial abscess	Neuro	F0405-1	F040511	124241000006113	192744002	296921010
Tropical sprue	other	J691	J691.00	79003019	47384003	79003019
Drainage of abscess of brain tissue	Neuro	70040	7004000	265687014	171472002	265687014
Acute phlegmonous laryngitis	Viral URTI	H0403	H040300	301055012	195683003	301055012
Postimmunisation encephalitis	Neuro	F034	F034.00	211261000006116	192704009	296870010
Gram negative septicaemia NOS	other	A3840	A384000	806571000006110	449082003	2898809016
Specific diseases due to coxsackie virus	other	A74	A74..00	133451000006111	186658007	286905019
Cellulitis of ankle	Cellulitis	M086	M086.00	40768015	24288004	40768015
Vincent's pharyngitis	bacterial URTI	AA12	AA12.00	60991000006118	186963008	287433015
Post hepatitis A vaccination encephalitis	Neuro	F034H	F034H00	296888019	192722007	296888019
Uveitis due to secondary syphilis	other	A915	A915.00	287232010	186854007	287232010
Staphylococcal pleurisy	pneumonia	H510A	H510A00	6320012	3144005	6320012
Female pelvic inflammatory disease NOS	Genital	K4z	K4z..00	304783019	198130006	304641016
Pleurisy without effusion or active tuberculosis NOS	pneumonia	H510z	H510z00	301656014	196076002	301646010
Bile duct calculus + acute cholecystitis and obstruction	Hepatobiliary	J6431	J643100	511651000006114	197391003	303555014
Puerperal peritonitis	Puerperal	L402	L402.00	146176016	88178009	146176016
Resp TB bacteriologically and histologically confirmed	other	A124	A124.00	175131000006112	186192006	286236016
Tuberculous myelitis	Neuro	A1361	A136100	57296016	34320001	57296016
Bacterial pleurisy with effusion	pneumonia	H511	H511.00	141595017	85426002	141595017
Septicaemia due to anaerobes	other	A383	A383.00	1216098010	447843005	2899125019
Acute pyometra or uterine abscess	Genital	K4104	K410400	459971000006113	74945001	502862010
Acute miliary tuberculosis of a single specified site	other	A1800	A180000	286333010	186276006	286332017
Acute bronchitis due to mycoplasma pneumoniae	pneumonia	H060A	H060A00	350044014	233599001	350044014
Liver abscess and sequelae of chronic liver disease	Hepatobiliary	J62	J62..00	303466016	197324004	303466016
Obstetric breast infections	Puerperal	L45	L45..00	307933011	200364001	307933011
Rupture of syphilitic cerebral aneurysm	other	A94y6	A94y600	287283010	186893003	287283010
Rubella encephalitis	Neuro	F0306-1	F030611	296846011	192689006	296846011
Meningitis due to cryptococcus	Neuro	F0100	F010000	1221068018	14232007	1221068018
Mumps encephalitis	Neuro	A722	A722.00	694501000006118	31646008	52880019
Rhinovirus	other	A793	A793.00	149806015	41546002	69299016
Botulism	other	A041	A041.00	1778099018	398565003	1778099018
Acute hep B with delta-agent (coinfectn) without hep coma	Hepatobiliary	A7030	A703000	457401000006115	186626002	286866016
Postmeasles pneumonia	pneumonia	A551	A551.00	294997017	191727003	294997017
Notification of tuberculosis	other	65V9	65V9.00	264412013	170525009	264412013
Encephalitis lethargica	other	A4zy3	A4zy300	286669013	186499007	286669013
Pulmonary mycobacterial infection	pneumonia	A310	A310.00	193801000006119	84353005	139899017
Chronic viral hepatitis, unspecified	Hepatobiliary	A707X	A707X00	557081000006110	10295004	17930015
Acute endomyometritis	Genital	K4101	K410100	23938012	14053009	23938012
Other specified miliary tuberculosis	other	A18y	A18y.00	286335015	47604008	79348014
Vivax malaria - benign tertian	other	A841	A841.00	1225159013	27052006	1225159013
Acute delta-(super)infection of hepatitis B carrier	Hepatobiliary	A7051	A705100	353575013	235865005	353575013
Meningococcal endocarditis	Cardiovascular	A3642	A364200	58154014	34845009	58154014
Pneumococcal pleurisy	pneumonia	H5109	H510900	5407016	2585002	5407016
Other bacterial disease NOS	other	A3z	A3z..00	286629012	87628006	145291019
Chlamydial infection of genital organs NEC	Genital	A78A5	A78A500	314991000000117	312099009	455763019
Peritonitis - tuberculous	Peritonitis	J5502	J550200	1230111017	44572005	1230111017
Blackwater fever	other	A848	A848.00	1231625012	56625005	1231625012
Cystitis in bilharziasis	UTI	K1542	K154200	221191000000117	60979006	498899013
St. Louis encephalitis	Neuro	A623	A623.00	2554106014	417607009	2554105013
Bubonic plague	other	A200	A200.00	84656014	50797007	84656014
Staphylococcal arthritis and polyarthritis	Bone	N0108	N010800	309459014	201466005	309459014
Helicobacter pylori cause diseases classified other chapters	Gastrointestinal	A3BXJ	A3BXJ00	819621000006115	6185008	11269013
RBC malaria parasitaemia count	other	42Y5	42Y5.00	1773574012	995651000000109	2572461000000110
Other cholangitis	Hepatobiliary	J661y	J661y00	303618016	82403002	136680010
Bancroftian filariasis	other	AC50	AC50.00	129358010	77947001	129358010
Legionella antibody positive	other	43D3	43D3.00	257860011	165821008	257860011
Gonococcal endocarditis	Cardiovascular	A98y3	A98y300	101445019	61048000	101445019
Listeriosis	Gastrointestinal	A270	A270.00	8147016	4241002	8147016
Other gastrointestinal tract tuberculosis NOS	other	A14yz	A14yz00	286272011	240376003	360080012
Other specified bacterial infection NOS	other	A3Byz	A3Byz00	286626017	87628006	145291019
[X]Viral infection, unspecified	other	AyuDG	AyuDG00	288209013	34014006	56798014
Enteric fever	Gastrointestinal	A010-1	A010.11	645681000006118	4834000	9059014
Viral pneumonia NEC	pneumonia	H20y	H20y.00	301363018	75570004	125510013
Senile dermatitis herpetiformis	other	M1452	M145200	13128017	7354003	13128017
Epididymo-orchitis with no abscess	Genital	K2421	K242100	646971000006115	57731009	96004017
Lymphocytic choriomeningitis	Neuro	A4z0	A4z0.00	1777697019	398136003	1777697019
Obstetric breast infection NOS	Puerperal	L45zz	L45zz00	307971015	200364001	307933011
Hepatitis A - current infection	Hepatobiliary	2J23	2J23.00	454393018	310875001	454393018
Acute pelvic cellulitis	Genital	K4031	K403100	396760015	237037006	355291010
Acute sinusitis NOS	bacterial URTI	H01z	H01z.00	301015010	15805002	26785019
Other specified salmonella infection	other	A02y	A02y.00	286083014	302231008	443816015
Infect and inflammatory reaction due to internal joint pros	Bone	SP060	SP06000	324937010	213121005	324937010
Candidal septicaemia	other	AB2y3	AB2y300	287577013	447841007	2899123014
Single lung abscess	pneumonia	H5300	H530000	301681012	196108004	301681012
Septicaemia NOS	other	A38z	A38z.00	395333017	91302008	151281010
Puerperal endometritis unspecified	Puerperal	L4000	L400000	307665011	22399000	37601018
Herpes zoster with other ophthalmic complication	other	A532z	A532z00	286717010	186524006	286714015
Orchitis and epididymitis NOS	Genital	K24z	K24z.00	304439012	197983000	304417010
Notification of AIDS	other	65VE	65VE.00	264418012	170530008	264418012
Pyogenic arthritis, unspecified	Bone	N0105	N010500	400159012	267880006	400159012
Cytomegaloviral hepatitis	Hepatobiliary	A7852	A785200	286985017	186698009	286985017
Dengue haemorrhagic fever	other	A6540	A654000	480874010	20927009	480874010
Arthropod-borne viral disease NOS	other	A6z	A6z..00	286856012	40610006	67738017
Osteomyelitis, unspecified	Bone	N303	N303.00	311894019	203245006	311894019
Pneumonia due to specified organism NOS	pneumonia	H23z	H23z.00	301382010	312342009	456043010
Schistosomiasis NOS	other	AC0z	AC0z.00	287749019	10087007	17604017
Pneumonia with aspergillosis	pneumonia	H246	H246.00	1219703018	111900000	1219703018
Empyema NOS	pneumonia	H50z	H50z.00	640711000006112	312682007	456436010
Herpes simplex with other specified complication	other	A54x	A54x.00	286754018	111854002	179026013
Postoperative pneumonia	pneumonia	H262	H262.00	459416013	314978007	459416013
Hepatitis in other infectious diseases EC	Hepatobiliary	J632	J632.00	303500011	235862008	353571016
[X]Cervicitis following delivery	Genital	Lyu6C	Lyu6C00	453237013	707089008	3028637012
Coxsackie viral meningitis	Neuro	A420	A420.00	599251000006111	111878007	179041013
Meningitis due to organism NOS	Neuro	F01z	F01z.00	296825019	312216007	455890018
Other acute osteomyelitis	Bone	N300S	N300S00	311807015	203172007	311807015
Other specified tuberculosis	other	A1y	A1y..00	286337011	56717001	94320019
Sarcoid myocarditis	Cardiovascular	G5y7	G5y7.00	1494958019	195033009	1494958019
Liver echinococcus multilocularis	other	AC25	AC25.00	739551000006118	27235001	45530017
Osteomyelitis, unspecified	Bone	N302z	N302z00	311893013	60168000	99949018
Tuberculous erythema nodosum	other	A1711	A171100	123913018	74610006	123913018
Lassa fever	other	A78y5	A78y500	32139019	19065005	32139019
Abscess of bladder	UTI	K15y2	K15y200	61219019	373611003	1212077012
Trypanosomiasis	other	A86	A86..00	130986013	78940002	130986013
Empyema with bronchopleural fistula	pneumonia	H5001	H500100	47025013	28085001	47025013
Abscess of larynx	bacterial URTI	H1y75	H1y7500	56633010	33924006	56633010
Tuberculosis of other urinary organs	other	A163	A163.00	286288011	111830007	179010012
Abscess of lung and mediastinum NOS	pneumonia	H53z	H53z.00	301688018	196107009	301680013
Bile duct calculus with acute cholecystitis	Hepatobiliary	J643	J643.00	303553019	197389006	303553019
Kala-azar	other	A850-2	A850.12	287156019	186803007	287156019
Amoebic lung abscess	pneumonia	A054	A054.00	108177016	65095005	108177016
Ascending cholangitis	Hepatobiliary	J6614	J661400	45033010	26918003	45033010
Erythema marginatum in acute rheumatic fever	Cardiovascular	M15y6	M15y600	308719019	200951007	308719019
Cervicitis and endocervicitis NOS	Genital	K420z	K420z00	396763018	198199009	304726012
Gallbladder calculus with acute cholecystitis	Hepatobiliary	J640	J640.00	1231999012	59771005	1231999012
Pneumonia with pertussis	pneumonia	H243-1	H243.11	1231962012	59475000	1231962012
Other acute osteomyelitis	Bone	N300Q	N300Q00	311805011	203170004	311805011
Abscess of lung with pneumonia	pneumonia	H5303	H530300	301686019	196112005	301686019
Septicaemia due to other gram negative organisms	other	A384	A384.00	149081000006113	449082003	2898809016
Lingular tonsillitis	bacterial URTI	H14y6	H14y600	301235017	195804009	301235017
Unspecified encephalitis due to other infection EC	Neuro	F033z	F033z00	296867011	312215006	455889010
Nonobstructive reflux-associated chronic pyelonephritis	Pyelonephritis	K1004	K100400	585761000006118	197764002	304064018
Encephalitis due to other infection EC	Neuro	F033	F033.00	296856010	312215006	455889010
Tuberculous pleurisy, conf bacteriologically/histologically	pneumonia	A1246	A124600	83211000006113	186200004	286245015
Onchocerciasis	other	AC53	AC53.00	64899013	38539003	64899013
Sample: virus identified	other	4J32	4J32.00	261264015	168208008	3307034011
Perinatal hepatitis causing jaundice, unspecified	other	Q4340	Q434000	316634019	387712008	1481791016
Other bacterial food poisoning	Gastrointestinal	A04	A04..00	286096010	66107000	109787018
Omental abscess	Peritonitis	J5522	J552200	1231294010	54138003	1231294010
Necrobacillosis	other	A3A3	A3A3.00	87434011	52542005	87434011
Ovarian, fallopian tube and pelvic inflammatory diseases	Genital	K40	K40..00	253801000006111	198130006	304641016
Obstetric nonpurulent mastitis NOS	Puerperal	L452z	L452z00	269261000006118	271372000	406118014
Staphylococcal food poisoning	Gastrointestinal	A040	A040.00	1234964014	84622004	1234964014
Influenza with pneumonia NOS	pneumonia	H270z	H270z00	301414016	195878008	301357010
Vincent's stomatitis	bacterial URTI	AA10	AA10.00	268763018	173599005	268763018
Tuberculosis of adrenal glands - Addison's disease	other	A176	A176.00	286325014	186270000	286325014
Acute lymphangitis of skin excluding digits of hand or foot	Cellulitis	M03-2	M03..12	357331012	238404003	357331012
Arthritis in other bacterial diseases classified elsewhere	Bone	N014	N014.00	309505013	111212009	178441013
Poliomyelitis encephalitis	Neuro	F0302-1	F030211	296841018	192686004	296841018
Nonpneumonic Legionnaires' disease	other	A3A40	A3A4000	360181013	240445005	360181013
Cerebral malaria	other	A8491	A849100	89147017	53622003	89147017
Arthropathy associated with other viral disease NOS	other	N015z	N015z00	309533013	239780003	359269012
Queensland tick typhus	other	A823	A823.00	114576016	68981009	114576016
Other specified viral and chlamydial diseases	other	A78y	A78y.00	287045016	543791000000108	1212571000000110
Haemorrhagic dysentery	Gastrointestinal	A0805	A080500	476199010	111939009	179084014
Other specified peritonitis NOS	Peritonitis	J55yz	J55yz00	303271013	48661000	81079010
Acute gangrenous pharyngitis	Viral URTI	H020	H020.00	301021014	195655000	301021014
Herpes simplex with other specified complication NOS	other	A54xz	A54xz00	286759011	111854002	179026013
Acquired human immunodeficiency virus infection syndrome NOS	other	A788z	A788z00	287021015	86406008	143288017
Postvaricella encephalitis	Neuro	A520	A520.00	286691018	186509002	286691018
Cellulitis and abscess of trunk NOS	Cellulitis	M032z	M032z00	308325018	200655000	308316012
Tetanus neonatorum	other	Q403	Q403.00	72433015	43424001	72433015
Acute pericarditis - pneumococcal	Cardiovascular	G50z2	G50z200	459371000006112	194916007	299895012
Neuropathic arthritis	other	N035-2	N035.12	675631000006115	67536000	500766011
Pneumonia due to parainfluenza virus	pneumonia	H202	H202.00	1232627018	64917006	499984015
Post yellow fever vaccination encephalitis	Neuro	F034B	F034B00	296882018	192716003	296882018
Other spirochaetal diseases	other	AA	AA...00	287393017	41116009	492887012
Infective myositis	Muscle	N230	N230.00	49663011	29689003	49663011
Acute rheumatic endocarditis	Cardiovascular	G011	G011.00	30726017	18192007	30726017
HIV disease resulting in mycobacterial infection	other	A7890	A789000	287023017	420818005	2617389018
Pseudomembranous colitis	Gastrointestinal	J4313-1	J431311	198411000006113	423590009	3307456018
Echinococcus granulosus infection of bone	other	AC230	AC23000	287771012	187137009	287771012
Secondary syphilis of tonsils	other	A9134	A913400	1234579013	81339006	1234579013
Other trematode infections	other	AC1	AC1..00	287750019	26089000	43714014
[X]Viral meningitis, unspecified	Neuro	Ayu8D	Ayu8D00	288129018	58170007	96672018
Acute paralytic poliomyelitis, wild virus, indigenous	other	A4032	A403200	286644013	186480003	286644013
Osteomyelitis, unspecified	Bone	N302P	N302P00	311878014	203230004	311878014
Tuberculous chorioretinitis	other	A1730	A173000	286317012	186263000	286317012
[X]Other viral enteritis	other	Ayu0E	Ayu0E00	287993012	78420004	130136015
Rosenbach erysipeloid	Cellulitis	A271-1	A271.11	1787100018	240395005	2986283019
Prostatitis in trichomoniasis	Genital	K2146	K214600	203521000006114	71590000	118926015
Acute catarrhal tonsillitis	bacterial URTI	H033	H033.00	301038013	195669000	301038013
Inflammatory conditions of jaws	Bone	J0642	J064200	302168016	196461003	302168016
Tuberculosis of genitourinary system	other	A16	A16..00	7551011	4445009	1230097015
Perianal cellulitis	Cellulitis	J540-1	J540.11	450687012	307425001	450687012
Encephalitis following measles	Neuro	F0351	F035100	641111000006119	111872008	2547664012
Asiatic schistosomiasis	other	AC02-1	AC02.11	400408016	268058007	400408016
Acute mastoiditis	bacterial URTI	F530	F530.00	1480221019	386034005	1480221019
Acute lower respiratory tract infection	pneumonia	H06z1-2	H06z112	579878017	195742007	301131016
Tuberculosis - lupus NOS	other	A1703	A170300	286303015	10528009	18298019
Vibrio cholerae	Gastrointestinal	A00-1	A00..11	126156018	75953000	126156018
Gonococcal infections NOS	other	A98z	A98z.00	395407014	15628003	26487014
Tuberculosis of mediastinum	other	A12y0	A12y000	138939013	83784000	138939013
Basal pleurisy	pneumonia	H5105	H510500	301650015	196079009	301650015
Other acute osteomyelitis	Bone	N3007-2	N300712	359767013	240142002	359767013
Primary tuberculous infection NOS	other	A10z	A10z.00	286216017	63309002	105234010
Multiple lung abscess	pneumonia	H5301	H530100	695331000006116	196109007	301682017
Endomyometritis unspecified	Genital	K41z1	K41z100	304720018	88027004	145916016
Unspecified secondary syphilis	other	A919	A919.00	287246010	240557004	360337011
Tuberculosis of pleura	pneumonia	A1200	A120000	286224010	186182003	286224010
Pneumonia due to haemophilus influenzae	pneumonia	H222	H222.00	219841000006117	70036007	116320011
Tuberculosis of bones and joints	Bone	A15x	A15x.00	286282012	38279006	64066010
Osteomyelitis, unspecified	Bone	N30zz	N30zz00	311963015	111253001	360276014
Other acute osteomyelitis	Bone	N300N	N300N00	311804010	203169000	311804010
Lung empyema NOS	pneumonia	H5013	H501300	301635012	58554001	97303014
Pneumonitis, unspecified	pneumonia	H263	H263.00	301791000000115	205237003	314740018
Pulmonary tuberculosis NOS	pneumonia	A11z	A11z.00	286222014	154283005	239551014
Clostridium difficile toxin detection	other	683B	683B.00	2474599010	991541000000109	2576011000000110
Acute obstructive laryngitis	Viral URTI	H0432	H043200	1001611000006110	408669002	2470530018
Pyoderma ulcerosum tropicalum	other	M0703	M070300	308401010	200718008	308401010
Acute suppurative cholecystitis	Hepatobiliary	J6503	J650300	148601017	89628003	148601017
Leishmaniasis NOS	other	A85z	A85z.00	287170019	80612004	133739018
Tuberculous chronic iridocyclitis	other	A1733	A173300	286320016	186266008	286320016
Herpes zoster with other specified complication NOS	other	A53xz	A53xz00	286721015	49183009	81926015
Mycobacterial disease NOS	other	A31z	A31z.00	286436018	88415009	146586014
Xanthogranulomatous pyelonephritis	Pyelonephritis	K104	K104.00	65241012	38898003	65241012
Aleppo boil	other	A8510	A851000	492936013	240637006	360447013
Cutaneous erysipeloid	Cellulitis	A2712	A271200	360108016	240394009	360108016
Baghdad boil	other	A8511	A851100	492933017	240637006	360447013
Other chronic osteomyelitis	Bone	N3016	N301600	311832018	203189004	311832018
Acute pyelonephritis NOS	Pyelonephritis	K101z	K101z00	304071011	36689008	61206018
Mediterranean tick fever	other	A8214	A821400	287106012	186774005	287106012
Bone and joint lesions of yaws	Bone	AA26-4	AA26.14	41231000006112	240681003	360501019
Female chronic pelvic peritonitis	Peritonitis	K4045	K404500	304682016	198161002	304682016
Acute sphenoidal sinusitis	bacterial URTI	H013	H013.00	129311019	77919000	129311019
Atrophic pharyngitis	Viral URTI	H1211	H121100	106138013	63866002	106138013
Tuberculous salpingitis	Genital	A1661	A166100	82550012	49558004	82550012
Divertic disease/both sml+lge intestin with perforat+abscess	Diverticulitis	J5128	J512800	626571000006113	197112002	303155015
Poliosis eccentrica	other	M2432	M243200	309053019	201174003	309053019
Bile duct calculus + acute cholecystitis and no obstruction	Hepatobiliary	J6430	J643000	511641000006112	197390002	303554013
Other specified diseases of upper respiratory tract	Viral URTI	H1y	H1y..00	301269016	201060008	308885014
Viral encephalitis from other arthropods	Neuro	A64	A64..00	395356014	34476008	57546016
Cowpox	other	A510	A510.00	116406017	70090004	116406017
Tuberculosis of large intestine	other	A14y1	A14y100	64199010	38420005	64199010
Proteus gastrointestinal tract infection	Gastrointestinal	A073	A073.00	286136014	186136006	286136014
Pyogenic arthritis, unspecified	Bone	N0104	N010400	1232174014	61112000	1232174014
Post hepatitis B vaccination encephalitis	Neuro	F034J	F034J00	296889010	192723002	296889010
Toxic liver disease with chronic active hepatitis	Hepatobiliary	J6355	J635500	303517016	197361008	303517016
Post polio vaccination encephalitis	Neuro	F034D	F034D00	296884017	192718002	296884017
Other clostridia causing food poisoning	Gastrointestinal	A043	A043.00	286099015	240357000	360053017
Poliomyelitis & other non-arthropod-borne viral diseases-CNS	other	A4	A4...00	221361000006118	302810003	444711011
Diphtheritic myocarditis	Cardiovascular	A32y1	A32y100	43764019	26117009	43764019
Tuberculous empyema	pneumonia	A1201	A120100	24683016	14527007	24683016
Other acute osteomyelitis	Bone	N3007-1	N300711	359768015	240143007	359768015
Vasitis	Genital	K2845	K284500	81299014	48792006	81299014
Sepsis of newborn due to Staphylococcus aureus	other	Q40A0	Q40A000	316480012	206378006	316480012
Polyneuropathy in herpes zoster	other	F3744	F374400	297557016	193190005	297557016
Herpetic aphthous ulceration	other	J0823	J082300	822411000006114	319297003	2670695010
Gonococcal peritonitis	Peritonitis	A98y5	A98y500	287355010	186939000	287355010
Meningococcal infection NOS	other	A36z	A36z.00	286477019	23511006	39478011
Periostitis of yaws	other	AA26-5	AA26.15	2475920017	240682005	360502014
Obstetric breast infection NOS	Puerperal	L45z	L45z.00	269561000006116	200364001	307933011
Other acute osteomyelitis	Bone	N300-2	N300.12	455901000006117	409780002	2471514017
Post aural mastoid fistula	bacterial URTI	F5311	F531100	216191000006110	43887004	493702018
Meningitis due to leptospira	Neuro	F01y0	F01y000	706461000006118	186956008	287417018
Other gonococcal infection of other specified site	other	A98yy	A98yy00	395405018	15628003	26487014
Acute gonorrhoea of lower genitourinary tract NOS	other	A980z	A980z00	287303014	54825009	497063017
Tuberculosis pericardium	other	A17y2	A17y200	82741000006111	67256000	111755011
Pian (yaws)	other	AA2-2	AA2..12	232571000006112	70647001	117353012
Mixed intestinal helminthiasis	other	AC7y	AC7y.00	150275012	90679001	150275012
H influenzae as cause/diseases classified/other chapters	other	A3BXD	A3BXD00	808051000006112	91428005	151462017
Spontaneous abortion with sepsis	other	L0400-1	L040011	112117014	67465009	112117014
Anterior nasal diphtheria	bacterial URTI	A322	A322.00	26577013	15682004	26577013
Pneumonia - candidal	pneumonia	AB24-1	AB24.11	219761000006111	3487004	6881018
Delhi boil	other	A8512	A851200	10606017	240637006	360447013
Bacterial meningoencephalitis+meningomyelitis,NEC	Neuro	F03X	F03X.00	502301000006114	963741000000101	2455531000000110
Postauricular fistula	bacterial URTI	F53y0	F53y000	73174016	43887004	493701013
Erysipelothrix infection, unspecified	Cellulitis	A271	A271.00	395329012	367434002	492052013
Acute cholangitis	Hepatobiliary	J6610	J661000	11316014	6215006	11316014
Other acute osteomyelitis	Bone	N300U	N300U00	311809017	203174008	311809017
Chronic multifocal osteomyelitis	Bone	N301L	N301L00	359776018	240151005	359776018
Pneumonia with infectious diseases EC	pneumonia	H24	H24..00	396104016	312342009	456043010
Nonvenereal endemic syphilis	other	AA40	AA40.00	222981000000111	271426000	406208014
Scrofula - tuberculous cervical lymph nodes	other	A1720-1	A172011	156441000006115	54084005	496856013
Chronic bacterial endocarditis	Cardiovascular	G5102	G510200	37702016	22462001	37702016
Meningitis due to coxsackie virus	Neuro	F0110	F011000	1219700015	111878007	1219700015
Extraintestinal yersiniosis	other	A273	A273.00	286414016	186329000	286414016
Prim respiratory TB without mention of bact or hist confirm	other	A1252	A125200	208961000006118	186202007	286247011
Aspiration of abscess of brain tissue	Neuro	70081	7008100	494851000006119	307292005	450518016
Cerebellar abscess	Neuro	F0401-1	F040111	132562011	79897009	132562011
Osteomyelitis, unspecified	Bone	N302Q	N302Q00	311879018	203231000	311879018
Herpes gestationis NOS	other	L169z	L169z00	306000010	86081009	142732017
Diaphragmatic pleurisy	pneumonia	H5104	H510400	22395010	13082000	22395010
Capillaria hepatica	other	AC8y1	AC8y100	10638010	36001007	60070011
Other specified late syphilis	other	A95y	A95y.00	287291018	72083004	119775017
Osteomyelitis of vertebra	Bone	N302D	N302D00	311868011	203220008	311868011
Adherent rheumatic pericardium	Cardiovascular	G100	G100.00	1494807015	56501009	1494807015
Late effects of genitourinary system tuberculosis	other	AE02	AE02.00	287963018	187254009	287963018
Acute gangrenous cholecystitis	Hepatobiliary	J6504	J650400	120482010	72533002	120482010
Pneumonia with measles	pneumonia	H240	H240.00	220111000006113	195900001	301386013
Tuberculosis lung bact and histological examin not done	pneumonia	A1251	A125100	89091000006114	186204008	286249014
Wool-sorters' disease	other	A221-1	A221.11	54111000006111	409498004	2471280015
Chronic viral hepatitis B without delta-agent	Hepatobiliary	A7071	A707100	286879013	186639003	286879013
Obstetric breast infection NOS, unspecified	Puerperal	L45z0	L45z000	307972010	200364001	307933011
Acute bronchitis or bronchiolitis NOS	pneumonia	H06z	H06z.00	301132011	10509002	18268014
Cutaneous mycobacterial infections	other	A311	A311.00	605311000006113	25626000	1785006010
[X]Dementia in human immunodef virus [HIV] disease	other	Eu024	Eu02400	376571000006116	421529006	2622767013
Tuberculosis of meninges and central nervous system	Neuro	A13	A13..00	89511000006113	10706006	18595015
Hepatitis in viral diseases EC	Hepatobiliary	J631	J631.00	303491016	3738000	7302012
Herpes simplex encephalitis	Neuro	F0304-1	F030411	822021000006114	427796004	2692052013
Chronic laryngitis NOS	Viral URTI	H160z	H160z00	555041000006112	29951006	50120012
Other specified arthropod-borne viral diseases	other	A6y	A6y..00	286850018	40610006	67738017
Piry fever	other	A66y1	A66y100	68971014	41348000	68971014
Acute laryngitis and tracheitis	Viral URTI	H04	H04..00	412576019	276443001	412576019
Poliosis -acquired	other	M2433	M243300	309054013	201175002	309054013
Pyogenic arthritis, unspecified	Bone	N0100	N010000	309441011	372939007	1211457012
Staphylococcal gastrointestinal tract infection	Gastrointestinal	A0740	A074000	395319017	266077001	395319017
Other specified tuberculosis of central nervous system	other	A13y	A13y.00	286268012	10706006	18595015
Trachoma inclusion conjunctivitis	other	A761-1	A761.11	93141000006119	231861005	347442013
Suppurative cholangitis	Hepatobiliary	J6613	J661300	116009017	69850007	116009017
Puerperal salpingitis	Puerperal	L401	L401.00	35192019	20932005	35192019
Pericaecal abscess	Peritonitis	J5529	J552900	303258010	197179001	303258010
Bacteria causing diseases classified elsewhere	other	A3Bx	A3Bx.00	502121000006118	87628006	145291019
Acute obliterating bronchiolitis	pneumonia	H0611	H061100	99508014	59903001	99508014
Other specified bacterial disease NOS	other	A3Ayz	A3Ayz00	286582011	87628006	145291019
Other mastoid disorders	bacterial URTI	F53y	F53y.00	299097017	55996006	93133010
Leptospirosis NOS	other	AA0z	AA0z.00	287425016	77377001	128434017
Other chronic osteomyelitis	Bone	N3011	N301100	311824014	203184009	311824014
Chronic salpingo-oophoritis	Genital	K4012	K401200	304659018	198142001	304659018
Other specified bacterial infection	other	A3By	A3By.00	286613016	87628006	145291019
[X]Coliform bacteria/cause/disease classifd/oth chapters	other	AyuKH-1	AyuKH11	371191000006115	40733004	67939016
Tetanus omphalitis	other	Q4031	Q403100	101607010	61145000	101607010
Other viral meningitis	Neuro	F011y	F011y00	296815012	58170007	96672018
Maternal gonorrhoea in pregnancy - baby not yet delivered	other	L1713	L171300	716061000006112	199165004	306042012
Maternal gonorrhoea during pregnancy/childbirth/puerperium	other	L171	L171.00	716051000006110	199161008	306034011
Chronic membranous rhinitis	Viral URTI	H1206	H120600	301185016	195772001	301185016
Osteomyelitis, unspecified	Bone	N3022	N302200	311857011	60168000	99949018
Tuberculous arthritis	Bone	A15y	A15y.00	286283019	190710003	293129018
Hepatitis in viral diseases EC NOS	Hepatobiliary	J631z	J631z00	303499019	3738000	7302012
Encephalitis in viral disease NOS	Neuro	F030z	F030z00	296852012	34476008	57546016
Chronic pelvic inflammatory diseases NOS	Genital	K404z	K404z00	304683014	237044002	355304013
Hepatitis in infectious diseases EC NOS	Hepatobiliary	J632z	J632z00	303505018	235862008	353571016
Other suppurative peritonitis	Peritonitis	J552	J552.00	396379019	235983003	353740010
General paralysis of insane	other	A941-1	A941.11	496157019	51928006	496157019
Tabes dorsalis - neurosyphilis	other	A940	A940.00	496154014	316841006	1227846019
Gonococcal bursitis	other	A9852	A985200	77829012	46699001	77829012
Extradural and subdural abscess, unspecified	Neuro	F04X	F04X.00	659941000006115	192737006	296909011
Other specified diphtheria	bacterial URTI	A32y	A32y.00	286437010	397428000	1777082016
Acute miliary tuberculosis of multiple sites	other	A1801	A180100	286334016	186278007	286334016
[X]Other specified puerperal infection	Puerperal	Lyu62	Lyu6200	308191013	178280004	275923014
Whooping cough NOS	bacterial URTI	A33z	A33z.00	286452015	27836007	46589015
Chronic ulcerative rhinitis	Viral URTI	H1205	H120500	301184017	195771008	301184017
Other specified peritonitis	Peritonitis	J55y	J55y.00	303266018	48661000	81079010
Maternal rubella in pregnancy, childbirth and the puerperium	other	L175	L175.00	405121019	84939004	140828013
Thyroid echinococcus granulosus	other	AC22	AC22.00	101331000006117	65963007	109550012
Other primary progressive tuberculosis	other	A10y	A10y.00	286215018	111832004	179011011
Meningitis due to escherichia coli	Neuro	F00y2-1	F00y211	296793013	192655005	296793013
Encephalitis following chickenpox	Neuro	F0350	F035000	286689014	186509002	286689014
Japanese encephalitis	Neuro	A620	A620.00	88093014	52947006	496495017
Septicaemia due to coagulase-negative staphylococcus	other	A3811	A381100	286501019	449505005	2900363011
American cutaneous leishmaniasis	other	A854	A854.00	128337013	77327004	128337013
Other acute osteomyelitis	Bone	N300X	N300X00	311812019	203177001	311812019
Other acute osteomyelitis	Bone	N3001	N300100	458761000006113	7587000	13543014
Osteomyelitis, unspecified	Bone	N30z	N30z.00	520081000006110	111253001	360276014
Herpes zoster with other specified complication	other	A53x	A53x.00	286718017	49183009	81926015
Postoperative septic shock	other	SP201	SP20100	325119019	213256002	325119019
Pneumonia with cytomegalic inclusion disease	pneumonia	H241	H241.00	220071000006117	7678002	13688018
Osteomyelitis, unspecified	Bone	N302M	N302M00	311876013	203228001	311876013
Slow viral central nervous system infection	other	A41	A41..00	286646010	186482006	286646010
Acute haemophilus influenzae laryngitis	bacterial URTI	H0404	H040400	301057016	195684009	301057016
Pneumococcal pleurisy with effusion	pneumonia	H5110	H511000	40785018	24302002	40785018
Acute streptococcal bronchitis	pneumonia	H0607	H060700	301106017	195720006	301106017
Drainage of abscess of subdural space	Neuro	70341	7034100	628551000006116	171722000	265981012
Tuberculosis of spine	Bone	N304	N304.00	1228335014	35984006	1228335014
Varicella meningitis	Neuro	F0117	F011700	1219078018	10491005	1219078018
Oth staphylococcus/cause/diseases classified/oth chapters	other	A3BX8	A3BX800	39921000006115	56038003	93212013
Gonococcal tenosynovitis	Muscle	A9851-2	A985112	359633011	240039005	359633011
Tropical pyomyositis	Muscle	A3Ay0	A3Ay000	108199012	65110003	108199012
Other specified mycobacterial disease	other	A31y	A31y.00	286435019	88415009	146586014
Papovavirus infection	other	A797	A797.00	250131000006115	243583005	364309013
Cytomegalic inclusion disease	other	A785	A785.00	48461012	28944009	48461012
Influenza with other respiratory manifestation	Viral URTI	H271	H271.00	301415015	6142004	11203012
Acute paralytic poliomyelitis, wild virus, imported	other	A4031	A403100	286643019	186479001	286643019
Other specified viral exanthemata	other	A57y	A57y.00	286787019	186504007	286679010
Other acute osteomyelitis	Bone	N300-1	N300.11	2471512018	409778008	2471512018
Siberian tick typhus	other	A8220	A822000	2550856014	186781003	2550856014
Tuberculous meningoencephalitis	Neuro	A1303	A130300	52073015	31112008	52073015
Acne agminata	other	M261G	M261G00	357834014	238752009	357834014
Rheumatoid carditis	Cardiovascular	G5yA	G5yA.00	48361011	28880005	48361011
Pneumonia due to bacteria NOS	pneumonia	H22yz	H22yz00	301375011	53084003	88303013
Arthritis in Lyme disease	other	N010A	N010A00	485678014	33937009	485678014
Postoperative septicaemia	other	SP254	SP25400	506459019	698819004	2981352015
Tuberculosis of eye	other	A173	A173.00	81815010	49107007	81815010
Cellulitis and abscess of upper arm	Cellulitis	M0332	M033200	308329012	200668008	308329012
Tuberculosis of larynx, trachea & bronchus conf bact/hist'y	other	A1245	A124500	89391000006112	186199002	286244016
Secondary syphilis relapse	other	A917	A917.00	287242012	186861006	287242012
Chagas' disease with heart involvement	other	A860	A860.00	2754013	998008	2754013
Tuberculosis of bones and joints	Bone	A15z	A15z.00	286284013	56717001	94320019
Tuberculosis of mediastinal lymph nodes	other	A1211	A121100	136831015	82495004	136831015
Acute hep B with delta-agent (coinfection) with hep coma	Hepatobiliary	A7020	A702000	457391000006117	186624004	286863012
Unspecified coxsackie carditis	other	A742z	A742z00	286911016	128405007	206704014
Syphilitic optic atrophy	other	A94y3	A94y300	37581011	22386003	37581011
Osteopathy in other infectious diseases classified elsewhere	Bone	A0224	A022400	12270011	6803002	12270011
Cytomegaloviral pancreatitis	other	A7851	A785100	353692014	235947007	353692014
[D]Laboratory evidence of human immunodefiency virus [HIV]	other	R109	R109.00	317670010	165816005	257855012
Mumps with no complication	other	A72z	A72z.00	694641000006115	111870000	179036017
Human immunodef virus resulting in other disease	other	A789	A789.00	287022010	81000119104	2967570018
Haverhill fever	other	A261-1	A261.11	86780019	52138004	86780019
Pleural empyema	pneumonia	H5012	H501200	218821000006118	58554001	97303014
Dracontiasis - guinea worm	other	AC57	AC57.00	223071000000116	396334002	1785548013
Obstetric breast abscess NOS	Puerperal	L451z	L451z00	307952017	270502007	405132019
Coxsackie viral diseases NOS	other	A74z	A74z.00	286917017	186658007	286905019
Tuberculosis with erythema nodosum hypersensitivity reaction	other	A171	A171.00	82791000006119	74610006	123913018
Acute cholecystitis unspecified	Hepatobiliary	J6500	J650000	303578015	65275009	108454010
HIV disease resulting in Burkitt's lymphoma	other	A7896	A789600	287029018	713897006	3297968018
Other non-bacterial meningitis NOS	Neuro	F01yz	F01yz00	296824015	312216007	455890018
Bile duct calculus + other cholecystitis and obstruction	Hepatobiliary	J6441	J644100	511681000006118	30093007	50351011
TB intrathoracic lymph nodes confirm bact histologically	other	A1244	A124400	107751000006115	78436002	130160016
Pyogenic arthritis, unspecified	Bone	N0101	N010100	1228677017	36678001	1228677017
Osteomyelitis, unspecified	Bone	N302S	N302S00	311881016	203233002	311881016
Other acute osteomyelitis	Bone	N300F	N300F00	311797015	203162009	311797015
Rheumatic fever with heart involvement	Cardiovascular	G01	G01..00	299566014	703119002	3007168016
Osteomyelitis of vertebra	Bone	N302B	N302B00	311866010	203218005	311866010
Bacterial pleurisy with effusion NOS	pneumonia	H511z	H511z00	301661011	85426002	141595017
Meningitis due to ECHO virus	Neuro	F0111	F011100	296810019	192667007	296810019
Cystitis in trichomoniasis	UTI	K1547	K154700	304201019	197850006	304201019
Abscess of gallbladder	Hepatobiliary	J650-1	J650.11	53540011	32038009	53540011
Herpes zoster with meningitis	Neuro	A530	A530.00	18244018	10491005	1219080012
Scrub mite-borne typhus	other	A812	A812.00	406206013	271425001	406206013
Orchitis and epididymitis	Genital	K24	K24..00	304417010	197983000	304417010
Poliomyelitis osteopathy NOS	other	N307z	N307z00	311944016	203284001	311933012
Herpes simplex meningitis	Neuro	A54x1	A54x100	822051000006117	23291008	39094012
Cytomegaloviral pneumonitis	pneumonia	A7850	A785000	1234028011	7678002	1234028011
Unspecf streptococ/cause/diseases classified/oth chapters	other	A3BX6	A3BX600	81561000006112	40733004	492755015
Chronic proliferative peritonitis	Peritonitis	J55y0	J55y000	75626018	45365002	75626018
Pulmonary anthrax	other	A221	A221.00	195367012	11389007	195367012
Other cholecystitis	Hepatobiliary	J651	J651.00	303581013	76581006	127173011
Acute and subacute bacterial endocarditis NOS	Cardiovascular	G510z	G510z00	299911015	266237004	395761013
Herpes simplex meningitis	Neuro	F0113-1	F011311	39094012	23291008	39094012
Liberty measles	other	A56-3	A56..13	744071000006119	36653000	61155017
Rubella with other specified complication NOS	other	A56xz	A56xz00	286783015	36653000	61155017
Tuberculous synovitis	other	A15-3	A15..13	43134017	25738004	43134017
Juvenile neurosyphilis	other	A904	A904.00	755931000006116	266126006	395387011
Other specified coxsackie virus disease	other	A74y	A74y.00	286916014	186658007	286905019
Pneumonia due to proteus	pneumonia	H22y1	H22y100	219931000006117	195888009	301371019
Spirochaetal jaundice	other	AA00-1	AA00.11	503539013	77377001	503539013
Plague	other	A20	A20..00	97625011	58750007	97625011
Pseudomonas as cause/diseases classifd to other chapters	other	A3BXF	A3BXF00	198461000006111	63398001	105386015
Acute paralytic poliomyelitis, unspecified	other	A403	A403.00	286641017	240460008	360197015
Lymphocytic choriomeningitis	Neuro	F0115-1	F011511	699471000006112	398136003	1777697019
Lepromatous leprosy (type L)	other	A300	A300.00	747941000006119	21560005	1222644013
Tuberculosis of nasal sinus	other	A12y3	A12y300	87729013	52721006	87729013
Other acute osteomyelitis	Bone	N3003	N300300	458721000006119	19956000	33595013
Otogenic intracranial abscess	Neuro	F0402-1	F040211	253201000006112	192741005	296917015
Tuberculosis of other organs NOS	other	A17z	A17z.00	286331012	56717001	94320019
Sequelae of viral hepatitis	other	AE23	AE23.00	287970018	187260009	287970018
Parvovirus as cause of diseases classified to oth chapters	other	A7y04	A7y0400	246801000006118	186748004	287061019
Tuberculosis of stomach	other	A17y3	A17y300	286328011	186272008	286328011
Liver abscess - excluding amoebic liver abscess	Hepatobiliary	J620	J620.00	303468015	27916005	46731011
Pyogenic arthritis, unspecified	Bone	N0106	N010600	400160019	267881005	400160019
Tuberculoma of spinal cord	Neuro	A134	A134.00	2549441013	416903004	2549441013
Tuberculous abscess of spinal cord	Neuro	A135	A135.00	2548529013	417484006	2548529013
[D]Endotoxic shock	other	R0552	R055200	317353010	371769008	1210367014
Primary genital syphilis	other	A910	A910.00	287222015	186847001	287222015
Pfeiffer's disease	other	A75-2	A75..12	230471000006112	271558008	1225197013
Other acute osteomyelitis	Bone	N3005-2	N300512	237641000006118	80507005	133587013
Tuberculosis of liver	other	A17y4	A17y400	286329015	186273003	286329015
Epididymo-orchitis with abscess	Genital	K2420	K242000	45391017	27141002	45391017
Influenza with encephalopathy	other	H27y0	H27y000	123962018	74644004	123962018
Hansen's disease	other	A30-1	A30..11	134371019	81004002	134371019
Acute emphysematous cholecystitis	Hepatobiliary	J6502	J650200	53589018	32067005	53589018
Tuberculous pleurisy in primary progressive tuberculosis	pneumonia	A101	A101.00	286214019	186172004	286214019
Chronic endomyometritis	Genital	K4111	K411100	29947013	17716001	29947013
Tuberculosis of other specified organs NOS	other	A17yz	A17yz00	286330013	56717001	94320019
Escherichia coli meningitis	Neuro	F00y2-2	F00y212	296792015	192655005	296792015
Cutaneous anthrax	other	A220	A220.00	140895019	84980006	140895019
[X] Peritoneal dialysis associated peritonitis	Peritonitis	SP056-3	SP05613	453312018	276883000	413231010
Acute parametritis	Genital	K4030	K403000	304674016	198156004	304674016
Retrovirus infection	other	A798	A798.00	291993019	105635000	291993019
Post paratyphoid vaccination encephalitis	Neuro	F0342	F034200	296873012	192707002	296873012
Induced malaria	other	A847	A847.00	6237015	3095005	6237015
Other chronic osteomyelitis	Bone	N3017-2	N301712	359772016	240147008	359772016
Other acute osteomyelitis	Bone	N300z	N300z00	311816016	409780002	2471514017
Pyopneumothorax	pneumonia	H5015	H501500	56138017	33631007	56138017
Lupus - tuberculous	other	A170-1	A170.11	719321000006114	10528009	18298019
Physalopteriasis	other	AC7x-1	AC7x.11	38497017	22922006	38497017
Parrot fever	other	A73-1	A73..11	124764015	75116005	124764015
Other specified intestinal helminthiases	other	AC7x	AC7x.00	395456010	26249004	43968010
Tuberculosis of other specified organs	other	A17y	A17y.00	286327018	56717001	94320019
Obstetrical tetanus	other	A370	A370.00	286478012	186378005	286478012
Schistosoma mansoni	other	AC01	AC01.00	223061000000111	11168007	3035181011
Von Economo's encephalitis	Neuro	A4zy4	A4zy400	286671013	186499007	286671013
Tuberculosis of spinal meninges	Neuro	A1301	A130100	64723010	38115001	64723010
Asian desert cutaneous leishmaniasis	other	A852	A852.00	287163019	186807008	287163019
Tuberculosis of intrathoracic lymph nodes NOS	other	A121z	A121z00	286231014	78436002	130160016
On tuberculosis chemoprophylaxis	other	65Y1	65Y1.00	2533971018	414940009	2533971018
Gonococcal proctitis	other	A987	A987.00	71324019	42746002	71324019
Arthritis in other infectious and parasitic diseases EC	Bone	N017-1	N017.11	359273010	239782006	359273010
Chronic follicular pharyngitis	Viral URTI	H1216	H121600	301198013	195782000	301198013
Taenia solium infection, intestinal form	other	AC30	AC30.00	114521000006113	266160004	395447019
Pneumonic plague, unspecified	pneumonia	A205	A205.00	286339014	38976008	65377015
Lung tuberculosis	pneumonia	A11-1	A11..11	732921000006113	154283005	239551014
Fibrinous pleurisy	pneumonia	H5107	H510700	128069014	77138008	128069014
Pneumococcal peritonitis	Peritonitis	J551	J551.00	97561012	58710009	97561012
Other enterovirus diseases of central nervous system	other	A4y	A4y..00	286658010	53648006	89193019
Bacterial food poisoning	Gastrointestinal	A0-1	A0...11	109787018	66107000	109787018
Zoster encephalitis	Neuro	A5314	A531400	344957015	230176008	344957015
Measles with intestinal complications	other	A554	A554.00	286772012	186562009	286772012
Simple chronic pharyngitis	Viral URTI	H1210	H121000	481672015	2365002	481672015
Tuberculosis - scrofuloderma	other	A1702	A170200	89021000006112	82796002	137345013
Influenza with other manifestations	Viral URTI	H27y	H27y.00	301421016	6142004	11203012
Other viral or chlamydial diseases	other	A78	A78..00	286958012	543791000000108	1212571000000110
Subacute salpingitis	Genital	K4008	K400800	116452012	70120007	116452012
Gallbladder calculus with other cholecystitis + obstruct	Hepatobiliary	J6411	J641100	797991000006115	235919008	353656010
HIV disease result/haematological+immunologic abnorms,NEC	other	A788U	A788U00	825731000006117	943041000000105	2412691000000110
Toxoplasmosis encephalitis	Neuro	F0334-1	F033411	296864016	192701001	296864016
Beef tapeworm infection	other	AC32-1	AC32.11	114877019	69163003	114877019
Sepsis of newborn due to other+unspecified streptococci	other	Q40W	Q40W.00	148841000006115	944061000000108	2415001000000110
Notification of acute polio	other	65VD	65VD.00	264417019	170529003	264417019
	Puerperal
	Puerperal
Chlamydial peritonitis	Peritonitis	J5504	J550400	303245014	197172005	303245014
Acute pyonephrosis	Pyelonephritis	K1013	K101300	304070012	197770008	304070012
Osteomyelitis of vertebra	Bone	N302C	N302C00	311867018	203219002	311867018
Tuberculosis of lung, bacteriologically & histolog'y neg	pneumonia	A1250	A125000	89451000006113	186203002	286248018
Other specified gastrointestinal tract bacterial infection	Gastrointestinal	A074	A074.00	286141018	312108008	455772010
Tuberculosis of skin and subcutaneous tissue	other	A170	A170.00	406201015	271423008	406201015
Bordetella	other	A33-1	A33..11	77453010	26484003	483240018
Salpingitis following abortive pregnancy	Genital	L0903	L090300	305546013	609483006	2966741015
Subacute salpingo-oophoritis	Genital	K4007	K400700	304654011	198137009	304654011
Herpes simplex pneumonia	pneumonia	A54x4	A54x400	350073012	233624006	350073012
Osteomyelitis, unspecified	Bone	N3028	N302800	311863019	60168000	99949018
Acute rheumatic myocarditis	Cardiovascular	G012	G012.00	299567017	194709000	299567017
Acute gonococcal orchitis	Genital	A9813-1	A981311	457231000006112	30168008	50480018
Intracranial abscess	Neuro	F040	F040.00	46219013	27614006	46219013
Nonpyogenic meningitis	Neuro	F020	F020.00	585841000006112	192679007	296827010
Chronic pyelonephritis NOS	Pyelonephritis	K100z	K100z00	304067013	63302006	105227013
Perforated diverticulum of jejunum	Diverticulitis	J5121	J512100	303149013	197106007	303149013
Rheumatic fever without heart involvement	Cardiovascular	G00	G00..00	40870016	24363009	40870016
Keratitis due to syphilis	other	F4A54	F4A5400	298354014	193786000	298354014
Primary tonsil syphilis	other	A9123	A912300	1218996017	10345003	1218996017
Other mastoid disorder NOS	bacterial URTI	F53y1	F53y100	299099019	55996006	93133010
Unspecified malaria	other	A846	A846.00	287144015	61462000	102111015
Measles with unspecified complication	other	A55y	A55y.00	286775014	14189004	24142018
Actinomycosis unspecified site	other	A39z	A39z.00	286533011	11817007	20392016
Other chronic osteomyelitis	Bone	N301-2	N301.12	798701000006111	75886002	503142011
Coxsackie endocarditis	other	A7422	A742200	146107014	88129004	146107014
Nodular lung tuberculosis	pneumonia	A111	A111.00	1788181018	80602006	1788181018
Gallbladder calculus with acute cholecystitis + obstruction	Hepatobiliary	J6401	J640100	797951000006114	197378004	303542013
Acute bronchitis due to respiratory syncytial virus	pneumonia	H060D	H060D00	456031000006117	195727009	301115012
Cellulitis and abscess of arm NOS	Cellulitis	M033z	M033z00	308332010	200668008	308329012
Other acute osteomyelitis	Bone	N3005	N300500	400320011	268016009	400320011
Chronic parametritis and pelvic cellulitis	Genital	K404	K404.00	304679014	198159006	304679014
Acute epiglottitis with obstruction	bacterial URTI	H0431	H043100	1467013	222008	1467013
Tick-borne relapsing fever	other	A871	A871.00	17938010	10301003	17938010
Herpes simplex septicaemia	other	A545	A545.00	495285017	448784003	2897311015
Acute mastoiditis without complications	bacterial URTI	F5300	F530000	469779010	335846001	469779010
Latent late congenital syphilis	other	A906	A906.00	750331000006112	827006	505222010
Spirochaetal infection NOS	other	AAz	AAz..00	287474015	41116009	492887012
Pneumonia due to haemophilus influenzae	pneumonia	H222-1	H222.11	219851000006115	70036007	116320011
Chronic obstructive pyelonephritis	Pyelonephritis	K1005	K100500	354330018	236379002	354330018
Other chronic osteomyelitis	Bone	N301z	N301z00	311851012	40970001	68341014
Chronic gonococcal cystitis	UTI	A9831	A983100	147258010	88813005	147258010
Retrocaecal abscess	Peritonitis	J552A	J552A00	30556011	18089006	30556011
Malignant pustule	other	A220-1	A220.11	140896018	84980006	140896018
Plasmodium malariae malaria with nephropathy	other	A8441	A844100	287143014	186796004	287143014
Post influenza vaccination encephalitis	Neuro	F034G	F034G00	296887012	192721000	296887012
Other specified female pelvic inflammatory disease	Genital	K4y	K4y..00	304782012	198130006	304641016
Gallbladder calculus with other cholecystitis	Hepatobiliary	J641	J641.00	303544014	25924004	43438012
Tuberculous cervicitis	Genital	A1670	A167000	104401018	62819009	104401018
Abdominal actinomycosis	other	A392	A392.00	73186018	43894001	73186018
Kedani fever	other	A812-2	A812.12	2551171016	271425001	2551171016
Gallbladder calculus with other cholecystitis +no obstruct	Hepatobiliary	J6410	J641000	798001000006113	235919008	353656010
Malayan filariasis	other	AC51	AC51.00	127823010	76999009	127823010
Renal carbuncle	Pyelonephritis	K1022	K102200	158303015	3321001	6606012
Tuberculous pyelonephritis	Pyelonephritis	A1602	A160200	108231015	44323002	3320164011
Trichomonal prostatitis	Genital	AD103	AD10300	118926015	71590000	118926015
Gradenigo's syndrome	bacterial URTI	F5302	F530200	63283016	37936001	63283016
Diphtheria NOS	bacterial URTI	A32z	A32z.00	286440010	397428000	1777082016
Gonococcal synovitis or tenosynovitis	Muscle	A9851	A985100	395403013	266138002	395403013
Maternal malaria in pregnancy, childbirth and the puerperium	other	L174	L174.00	716221000006110	199183007	306063014
Pneumonia with typhoid fever	pneumonia	H24y6	H24y600	220241000006115	45312009	1230217011
Tuberculosis of retroperitoneal lymph nodes	other	A14y5	A14y500	27784014	16409009	27784014
Malaria due to simian plasmodia	other	A8440	A844000	287142016	186795000	287142016
Purulent pleurisy	pneumonia	H5014	H501400	1231843013	58554001	1231843013
Meningitis due to sarcoidosis	Neuro	F013	F013.00	296819018	192673008	296819018
Pseudoscarlatina	other	A57y4	A57y400	286792017	186581001	286792017
Chagas' disease with digestive system involvement	other	A8610	A861000	287174011	186815006	287174011
Tuberculosis seminal vesicle	other	A1651	A165100	82761000006110	12985005	22243017
Tuberculosis of tracheobronchial lymph nodes	other	A1212	A121200	142044014	85692003	142044014
Bacillus fragilis/cause/diseases classified/oth chapters	other	A3BXG	A3BXG00	501921000006113	444313007	2841458015
Major puerperal infection NOS	Puerperal	L40zz	L40zz00	307690013	2858002	5833018
Neuropathic arthropathy	other	N035	N035.00	500766011	67536000	500766011
Vancomycin resistant enterococcal septicaemia	other	A3805	A380500	2532525012	310649002	454258011
Proteus mirabilis infection	other	A3B60	A3B6000	1224987014	26195002	1224987014
Chronic meningitis	Neuro	F022	F022.00	36355017	21664006	36355017
Other chronic osteomyelitis	Bone	N3010	N301000	311823015	40970001	68341014
Viral agent as the cause of other diseases	other	A7y0	A7y0.00	287074013	34014006	56798014
Enteropathogenic Escherichia coli infection	other	A0700	A070000	360043018	240353001	360043018
Enterobacterial spondylitis	Bone	N11y1	N11y100	311113014	202699004	311113014
Endocervicitis with Nabothian cyst	Genital	K4207	K420700	304733012	198206001	304733012
Rheumatoid myocarditis	Cardiovascular	G5y8	G5y8.00	300221014	195136004	300221014
Acute neisseria catarrhalis bronchitis	pneumonia	H0609	H060900	301109012	195722003	301109012
Chronic hypertrophic laryngitis	Viral URTI	H1602	H160200	301245015	195813006	301245015
Cystitis in actinomycosis	UTI	K1540	K154000	1230922019	5093001	1230922019
Subperiosteal mastoid abscess	bacterial URTI	F5301	F530100	1233461016	72102005	1233461016
[X]Other viral meningitis	Neuro	Ayu8C	Ayu8C00	288127016	58170007	96672018
Coronavirus infection	other	A795	A795.00	287060018	186747009	287060018
Indeterminate leprosy (type I)	other	A302	A302.00	781961000006119	14386001	24451016
HIV disease resulting in multiple infections	other	A7894	A789400	287027016	186708007	287013014
Lymphangitis of breast - obstetric	Puerperal	L452-1	L452.11	411415010	275433009	411415010
Zoonotic bacterial diseases	other	A2	A2...00	56591000006116	23002003	38644016
Other specified respiratory tuberculosis NOS	other	A12yz	A12yz00	286257012	154283005	239551014
Other chronic osteomyelitis	Bone	N3015-2	N301512	359774015	240149006	359774015
Genitourinary tuberculosis NOS	other	A16z	A16z.00	286296018	4445009	7551011
Syphilitic interstitial keratitis	other	A903	A903.00	74345010	44568006	74345010
Staphylococcal meningitis	Neuro	F003	F003.00	20946014	12166008	20946014
Osteomyelitis, unspecified	Bone	N3024	N302400	311859014	60168000	99949018
Other primary syphilis	other	A912	A912.00	287224019	266127002	395388018
Acute fibrinous bronchitis	pneumonia	H0600	H060000	301100011	195714005	301100011
Ornithosis with pneumonia	pneumonia	A730	A730.00	134668017	81164001	134668017
Tuberculosis of urinary tract	other	A168	A168.00	2535679015	111830007	2535679015
Herpes zoster with other CNS complications	other	A5310	A531000	822331000006110	111861003	179029018
Chronic gonococcal epididymo-orchitis	Genital	A9833	A983300	59281014	35526001	59281014
Parametritis following abortive pregnancy	Genital	L0901	L090100	305544011	609473007	2966725016
Juvenile dermatitis herpetiformis	other	M142	M142.00	10833016	5906000	10833016
Other specified meningococcal infection NOS	other	A36yz	A36yz00	286476011	23511006	39478011
Epidural intracranial abscess	Neuro	F0403	F040300	296919017	192743008	296919017
Listerial cerebral arteritis	Neuro	A2703	A270300	286395017	186317009	286395017
Epidural intraspinal abscess	Neuro	F0410	F041000	768811000006115	63627007	1232479011
Tuberculous pyelitis	Pyelonephritis	A1601	A160100	61952018	37133005	61952018
Enterohaemorrhagic Escherichia coli infection	Gastrointestinal	A0703	A070300	360044012	240354007	360044012
Pneumonia due to other specified bacteria	pneumonia	H22y	H22y.00	301370018	53084003	88303013
Tuberculosis myocardium	other	A17y1	A17y100	89101000006115	47292005	78843017
Meningitis due to listeriosis	Neuro	F0071	F007100	1227542011	31568009	1227542011
Gonococcal pharynx infection	bacterial URTI	A986	A986.00	805501000006113	74372003	1233737010
Streptococc,group D/cause/disease classified/oth chapters	other	A3BX3	A3BX300	128761000006111	40733004	492755015
Other specified respiratory tuberculosis	other	A12y	A12y.00	286252018	154283005	239551014
ECHO viral meningitis	Neuro	A421	A421.00	296811015	192667007	296811015
Enteroinvasive Escherichia coli infection	Gastrointestinal	A0702	A070200	360051015	240355008	360051015
Bunyamwera fever	other	A6630	A663000	131687012	79376002	131687012
Enteroviral exanthematous fever	other	A4y1	A4y1.00	128598018	77470003	128598018
Framboesia	other	AA2-1	AA2..11	1233296019	70647001	1233296019
Scrofulous tuberculous abscess	other	A1721	A172100	286311013	186259007	286311013
Foodborne Bacillus cereus intoxication	Gastrointestinal	A04y0	A04y000	1222370018	19894004	1222370018
Pyogenic arthritis, unspecified	Bone	N0103-1	N010311	359267014	239778009	359267014
Gas gangrene	Muscle	A3A0	A3A0.00	798761000006112	80466000	133518010
Osteomyelitis, unspecified	Bone	N3021	N302100	311856019	60168000	99949018
Pelvic peritonitis following abortive pregnancy	Peritonitis	L0902	L090200	305545012	609474001	2966773014
Encephalitis due to varicella	Neuro	F0350-1	F035011	641091000006111	186509002	286690017
Pleuropneumonia-like organism (PPLO) infection	pneumonia	A3By4	A3By400	219291000006113	46970008	494705012
Chronic gonococcal endometritis	Genital	A9836	A983600	53464010	31999004	53464010
Other specified viral and chlamydial diseases NOS	other	A78yz	A78yz00	287049010	543791000000108	1212571000000110
Diverticulitis of the large intestine unspecified	Diverticulitis	J5116	J511600	303143014	4494009	7629011
Chronic cholangitis	Hepatobiliary	J6611	J661100	119489014	71912000	119489014
Acute suppurative laryngitis	Viral URTI	H0406	H040600	301059018	195686006	301059018
Typhoid and paratyphoid fevers	Gastrointestinal	A01	A01..00	286066017	186090001	286066017
Arthropathy with other viral disease, of multiple sites	other	N015x	N015x00	493281000006111	239780003	359269012
Listeria infection	Gastrointestinal	A2700	A270000	1229865016	4241002	1229865016
Encephalitis due to herpes zoster	Neuro	F0309	F030900	640911000006110	230176008	344958013
HIV dis reslt/oth mal neopl/lymph,h'matopoetc+reltd tissu	other	A789X	A789X00	825711000006111	86406008	143288017
Other and unspecified helminthiases	other	AC8	AC8..00	287848015	27601005	46186016
Abscess of trachea	bacterial URTI	H1yz0	H1yz000	94688016	56937005	1231668013
Gonococcal spondylitis	Bone	A9853	A985300	89215016	53664003	89215016
Toxoplasma meningoencephalitis	Neuro	AD00	AD00.00	296865015	192701001	296865015
Listeria septicaemia	Gastrointestinal	A2701	A270100	500396015	449335002	2897200014
Zika fever	other	A663D	A663D00	8553012	3928002	8553012
Pneumonia with candidiasis	pneumonia	H2470	H247000	220051000006110	3487004	6881018
Polyneuropathy in diphtheria	Neuro	F3743	F374300	345519017	230596007	345519017
Herpes zoster with other central nervous system complication	other	A531	A531.00	395349015	111861003	179029018
Tuberculoma of brain	Neuro	A132	A132.00	2548770013	416265003	2548770013
Chronic oophoritis	Genital	K4010	K401000	54399018	32582007	54399018
Tuberculous nephropathy	other	A1600	A160000	286285014	44323002	3320160019
Disseminated zoster	other	A53x1	A53x100	625341000006116	55560002	92352018
E coli as cause of diseases classified to other chapters	other	A3BXC	A3BXC00	633511000006110	71057007	118012014
Acute hepatitis E	Hepatobiliary	A7052	A705200	353577017	235867002	353577017
Cellulitis of trunk	Cellulitis	M0328	M032800	541421000006113	46876003	78133018
Gonococcal rectal infection	other	A9871	A987100	287348013	42746002	493427012
Pneumonia due to other aerobic gram-negative bacteria	pneumonia	H22yX	H22yX00	219881000006111	53084003	88303013
Encephalitis due to rickettsia EC	Neuro	F031	F031.00	296853019	419868009	2574515013
Bwamba fever	other	A6631	A663100	74369014	44583001	74369014
Other chronic osteomyelitis	Bone	N3015	N301500	400322015	268018005	400322015
Meningitis due to escherichia coli	Neuro	F00y2	F00y200	706381000006119	192655005	296793013
Enteroviral encephalitis	Neuro	A4y0	A4y0.00	344940019	230162007	344940019
[X]Other viral pneumonia	pneumonia	Hyu08	Hyu0800	301809014	75570004	125510013
Urinary calculus in schistosomiasis	other	K1A	K1A..00	304368014	197954003	304368014
Congenital falciparum malaria	other	Q4025	Q402500	412928014	276671000	412928014
Syphilitic parkinsonism	other	A94y1	A94y100	64875013	38523005	64875013
Subacute sclerosing panencephalitis	Neuro	A412	A412.00	296838010	192685000	296838010
Pseudomonas meningitis	Neuro	F00y6-1	F00y611	296801010	192660009	296801010
[X]Streptococc,group B/cause/disease classified/oth chapters	other	AyuK1	AyuK100	427691000006112	85769006	142172016
Acute bacterial laryngitis unspecified	bacterial URTI	H040x	H040x00	301064019	849571000000102	2201631000000110
[X]Staphylococcal infection, unspecified	other	Ayu3S	Ayu3S00	288064012	56038003	93212013
Other acute osteomyelitis	Bone	N300M	N300M00	311803016	203168008	311803016
[X]Other specified bacterial diseases	other	Ayu3R	Ayu3R00	288063018	87628006	145291019
[X]Staphylococ aureus/cause/diseases classified/oth chapters	other	AyuK6	AyuK600	427541000006116	56038003	93212013
Other specified viral diseases with exanthemata	other	A5y	A5y..00	286798018	186504007	286679010
[X]Acute upper respiratory infections	Viral URTI	Hyu0	Hyu0.00	362471000006114	54398005	90415012
[X]Measles without complication	other	AyuA7	AyuA700	288156016	14189004	24142018
Chlamydial inf of pelviperitoneum oth genitourinary organs	Genital	A78A3	A78A300	550791000006114	312099009	455763019
Other causes of encephalitis	Neuro	F03y	F03y.00	399391012	45170000	75325010
Other specified septicaemias	other	A38y	A38y.00	286511014	91302008	151276018
Pyogenic arthritis, unspecified	Bone	N0102	N010200	400157014	239779001	359268016
Miliary tuberculosis NOS	other	A18z	A18z.00	286336019	47604008	79348014
Other acute osteomyelitis	Bone	N300T	N300T00	311808013	203173002	311808013
Acute bacterial pharyngitis NOS	bacterial URTI	H023z	H023z00	301027013	195658003	301024018
Otogenic intracranial abscess	Neuro	F0402	F040200	296917015	192741005	296917015
Isolated tracheal or bronchial tuberculosis NOS	other	A122z	A122z00	286235017	700273003	2990051010
Recurrent hepatitis	Hepatobiliary	J6143	J614300	303407011	197286002	303407011
Louse-borne epidemic typhus	other	A80	A80..00	491941019	39111003	491941019
Empyema with no fistula	pneumonia	H501	H501.00	640801000006118	271504004	406306011
Acute myocarditis - coxsackie	other	G5201	G520100	299930015	194944008	299930015
Tuberculosis of ureter	other	A162	A162.00	134962018	81359005	134962018
Aerobacter aerogenes gastrointestinal tract infection	Gastrointestinal	A072	A072.00	472961000006112	421429008	3686609013
Plasmodium falciparum malaria with cerebral complications	other	A8400	A840000	287136015	186791009	287136015
Acute non-paralytic poliomyelitis	other	A402	A402.00	1221108018	14535005	1221108018
Human immunodeficiency virus with neurological disease	other	A7884	A788400	287012016	186707002	287012016
Obstetric breast abscess - delivered	Puerperal	L4511	L451100	307948017	200374003	307948017
Obstetric nonpurulent mastitis with antenatal complication	Puerperal	L4523	L452300	269281000006111	200383008	307959014
Infiltrative lung tuberculosis	pneumonia	A110	A110.00	286217014	186175002	286217014
Rhinopharyngitis mutilans	Viral URTI	AA25-1	AA25.11	481814010	24078009	481814010
[X]Other chronic suppurative otitis media	bacterial URTI	FyuP2	FyuP200	299529015	38394007	63478014
Diarrhoea due to staphylococcus	Gastrointestinal	A0740-1	A074011	1773224011	398570005	1773224011
[X]Chlamydial infection, unspecified	other	Ayu62	Ayu6200	288107017	105629000	169750018
[X]Other pneumonia, organism unspecified	pneumonia	Hyu0H	Hyu0H00	301818011	312342009	456043010
[X]Septicaemia, unspecified	other	Ayu3J	Ayu3J00	288053014	91302008	151281010
Proteus infection NOS	other	A3B6z	A3B6z00	286590011	186437007	286589019
[X]Actinomycosis, unspecified	other	Ayu3L	Ayu3L00	288056018	11817007	20392016
Osteomyelitis, unspecified	Bone	N30z4	N30z400	311968012	111253001	178471017
Tuberculosis of bones and joints	Bone	N3061	N306100	311927015	203278004	311927015
[X]Mycetoma, unspecified	other	AyuER	AyuER00	288235014	410039003	2471766011
Chronic hepatitis unspecified	Hepatobiliary	J614y	J614y00	303409014	76783007	127487019
Whooping cough - other specified organism	bacterial URTI	A33y	A33y.00	286448015	27836007	46586010
[X]Other viral infections of unspecified site	other	AyuDF	AyuDF00	288208017	34014006	56798014
[X]Mumps without complication	other	AyuD3	AyuD300	288196019	111870000	179036017
Pyelonephritis and pyonephrosis unspecified	Pyelonephritis	K10y	K10y.00	304083013	129128006	207841011
[X]Pneumonia in viral diseases classified elsewhere	pneumonia	Hyu0D	Hyu0D00	301814013	75570004	125510013
Pneumonia with systemic mycosis NOS	pneumonia	H247z	H247z00	301393012	233613009	350060013
Syphilis or venereal disease NOS	other	A9z	A9z..00	287392010	8098009	14372016
Rasmussen syndrome	Neuro	F0352	F035200	344986017	230191005	344986017
Tracheostomy sepsis	other	H5y01	H5y0100	41959016	25042006	41959016
Herpes gestationis - not delivered	other	L1693	L169300	305998017	199129009	305998017
Coccal infection NEC	other	A3By6	A3By600	286621010	87628006	145291019
Leptospiral meningitis	Neuro	AA0y0	AA0y000	287417018	186956008	287417018
Oophoritis - acute	Genital	K400-1	K400.11	221241000000117	16486000	27896014
Osteopathy from poliomyelitis	other	N307	N307.00	311933012	203284001	311933012
Obstetric breast infection NOS - delivered	Puerperal	L45z1	L45z100	307973017	200364001	307933011
Other chronic female pelvic peritonitis	Peritonitis	K408	K408.00	304695014	237044002	355303019
Meningitis due to mumps virus	Neuro	F0114	F011400	1230066019	44201003	1230066019
Other acute osteomyelitis	Bone	N300Y	N300Y00	311813012	203178006	311813012
Meningitis due to herpes simplex virus	Neuro	F0113	F011300	1223061016	23291008	1223061016
Bacterial infections - causative organisms	other	A3B	A3B..00	286583018	87628006	145291019
Osteomyelitis, unspecified	Bone	N30z8	N30z800	400325018	111253001	178471017
Plague - pestis minor	other	A20y2	A20y200	1230558015	186287003	286343013
Echinococcosis	other	AC2	AC2..00	124461010	74942003	124461010
Retrovirus as cause of diseases classified to other chapters	other	A7y01	A7y0100	170891000006110	105635000	169756012
Latent early syphilis	other	A92	A92..00	287248011	186867005	287248011
Erysipelothrix infection	Cellulitis	A2710	A271000	1785233018	367434002	1785233018
Acute capillary bronchiolitis	pneumonia	H0610	H061000	2478755014	5505005	2478755014
Serratia septicaemia	other	A3844	A384400	1216989010	449084002	2898811013
Schistosoma japonicum	other	AC02	AC02.00	9802010	10087007	17602018
Pseudomonas gastrointestinal tract infection	Gastrointestinal	A0741	A074100	395320011	266078006	395320011
Gonococcaemia NOS	other	A98yz-1	A98yz11	805251000006110	15628003	26487014
Other gastrointestinal tract tuberculosis	other	A14y	A14y.00	286271016	240376003	360080012
Tuberculosis of gastrointestinal tract NOS	other	A14z	A14z.00	286273018	240376003	360080012
Syphilis of tendon	Muscle	A9571	A957100	83152018	49923008	83152018
Chronic pharyngitis and nasopharyngitis NOS	Viral URTI	H12z	H12z.00	301200019	47841006	79723013
[X]Suppurative & necrotic conditions of lower respir tract	pneumonia	Hyu6	Hyu6.00	428401000006118	467481000000106	938601000000110
Dumdum fever	other	A850-1	A850.11	631931000006110	186803007	287152017
Maternal syphilis in pregnancy/childbirth/puerperium	other	L170	L170.00	715711000006115	199154009	306027014
Major puerperal infection NOS, unspecified	Puerperal	L40z0	L40z000	307691012	2858002	5833018
Streptococcal sore throat and scarlatina	bacterial URTI	A34	A34..00	121591000006115	186357007	286453013
Western equine encephalitis	Neuro	A621	A621.00	79221011	47523006	79221011
Tuberculosis of cerebral meninges	Neuro	A1300	A130000	149683011	90302003	149683011
Tuberculous intracranial abscess	Neuro	F0406	F040600	296922015	192745001	296922015
Osteomyelitis, unspecified	Bone	N3037	N303700	235331000006114	12890007	22103019
Encephalitis due to herpes simplex virus	Neuro	F0304	F030400	640901000006112	427796004	2692052013
Osteomyelitis of vertebra	Bone	N301C	N301C00	311841011	203195003	311841011
Subdural intracranial abscess	Neuro	F0405	F040500	296921010	192744002	296921010
Serratia infection	other	A3By5	A3By500	150011000006113	71120004	118107010
Cystitis in moniliasis	UTI	K1546	K154600	304198012	197849006	304198012
Fourth disease	other	A57y2	A57y200	101534019	61099007	101534019
[X]Resp TB unspcf,w'out mention/bacterial or histol confrmtn	other	Ayu13	Ayu1300	424871000006117	186202007	286247011
Subacute bronchitis unspecified	pneumonia	H060v	H060v00	301119018	36426008	60783018
Other specified viral exanthemata NOS	other	A57yz	A57yz00	286794016	186504007	286679010
Chronic pyometra	Genital	K4114	K411400	304716017	198189004	304716017
Epididymo-orchitis in diseases EC	Genital	K2423	K242300	304437014	198002008	304437014
Madura foot, mycotic	other	AB64-1	AB64.11	731371000006115	410038006	2471765010
Other bacterial diseases	other	A3A	A3A..00	286421016	87628006	145291019
Congenital sepsis NOS	other	Q40y0-1	Q40y011	359981019	1089000	2911010
Vibrio parahaemolyticus food poisoning	Gastrointestinal	A044	A044.00	1234561014	81159000	1234561014
Visceral herpes simplex	other	A54x0	A54x000	28067012	16592009	28067012
Tuberculous interstitial keratitis	other	A1732	A173200	131348017	79158003	131348017
Acute myocarditis - influenzal	other	G5203	G520300	299932011	194946005	299932011
Neonatal candida septicaemia	other	Q4075	Q407500	322664014	403000003	1782076016
Subacute pyometra	Genital	K4109	K410900	304713013	198186006	304713013
Measles with other specified complication	other	A55x	A55x.00	286773019	14189004	24142018
Tuberculosis of other organs	other	A17	A17..00	286297010	56717001	94320019
Maternal rubella during pregnancy - baby not yet delivered	other	L1753	L175300	306076015	199194006	306076015
Syphilitic endocarditis of mitral valve	other	A9321	A932100	287258010	186875004	287258010
Mumps with other specified complications	other	A72x	A72x.00	286889012	36989005	61702015
Viral hepatitis A with coma	Hepatobiliary	A700	A700.00	286858013	16060001	3008400017
Osteomyelitis, unspecified	Bone	N303z	N303z00	311910011	203245006	311894019
Acute poliomyelitis NOS	other	A40z	A40z.00	286645014	398102009	1777666018
Latent syphilis unspecified	other	A971	A971.00	287299016	76272004	126672010
Other acute osteomyelitis	Bone	N3002	N300200	1494966011	203164005	1494966011
Ghoul hand	other	AA23-1	AA23.11	26501010	15634005	26501010
Concato's disease	other	G5320	G532000	63347011	37980001	63347011
[X]Bacterial, viral and other infectious agents	other	AyuK	AyuK.00	288306015	40733004	67939016
Osteomyelitis, unspecified	Bone	N302H	N302H00	311872010	203224004	311872010
Osteomyelitis, unspecified	Bone	N302W	N302W00	311885013	111253001	178471017
Other specified non-arthropod-borne viral disease of the CNS	Neuro	A4zy	A4zy.00	9401000006114	302810003	444711011
Sepsis of newborn due to Escherichia coli	other	Q40A1	Q40A100	316481011	206379003	316481011
Neurosyphilis NOS	other	A94z	A94z.00	287285015	26039008	43626012
Meningitis due to pertussis	Neuro	F0078	F007800	296787017	192650000	296787017
Taboparesis	other	A941-2	A941.12	22773013	13310005	475206010
Multiple papillomata and wet crab yaws	other	AA21	AA21.00	694801000006116	271449003	406241012
Gonococcal keratosis	other	A98y0	A98y000	100229013	60335002	100229013
Filarial infection of conjunctiva	other	F4Cy0	F4Cy000	298532011	193904008	298532011
Diphtheria of penis	Genital	A32y5	A32y500	286438017	186347006	286438017
Enterotoxigenic Escherichia coli infection	Gastrointestinal	A0701	A070100	360040015	240352006	360040015
French measles	other	A56-2	A56..12	794601000006110	36653000	61155017
Viral carditis	other	A7A	A7A..00	287072012	186755002	287072012
Tuberculosis oesophagus	other	A178	A178.00	89121000006113	15284007	195678010
Mesenteric abscess	Peritonitis	J5523	J552300	53701015	32141002	53701015
Toxoplasma pneumonitis	pneumonia	AD04	AD04.00	287864011	187196002	287864011
Cystitis in tuberculosis	UTI	K1548	K154800	606691000006115	32268008	1227927016
Subacute and chronic melioidosis	other	A251	A251.00	286390010	186312003	286390010
Local salmonella infection unspecified	Gastrointestinal	A0220	A022000	286078018	47375003	78978016
Nasopharyngeal diphtheria	bacterial URTI	A321	A321.00	125540010	75589004	125540010
Non-arthropod-borne viral diseases of CNS NOS	other	A4zz	A4zz.00	587411000006116	302810003	444711011
Erythema nodosum with tuberculosis NOS	other	A171z	A171z00	286309016	74610006	123913018
Tuberculous pleurisy NOS	pneumonia	A120z	A120z00	286230010	186182003	286224010
Pyogenic arthritis, unspecified	Bone	N01zK	N01zK00	309616014	239777004	2126671000000110
Butter yaws	other	AA21-1	AA21.11	406243010	28343007	47450019
Diarrhoea due to Pseudomonas pyocyanea	Gastrointestinal	A0741-1	A074111	619821000006114	266078006	395320011
Abscess iliopsoas non tuberculous	Muscle	J552C-1	J552C11	439011000006118	235997006	353758016
Other chronic osteomyelitis	Bone	N3012	N301200	311825010	203185005	311825010
Acute myometritis	Genital	K4102	K410200	126472015	76151005	126472015
Encysted pleurisy	pneumonia	H51y0	H51y000	46467017	27757009	46467017
Ovale malaria	other	A843	A843.00	32605017	19341001	32605017
Acute pericarditis - tuberculous	other	G5003	G500300	299882019	194908003	299882019
Osteomyelitis of vertebra	Bone	N300C	N300C00	311794010	203159006	311794010
Puerperal endometritis with postnatal complication	Puerperal	L4002	L400200	307667015	200182007	307667015
Other acute osteomyelitis	Bone	N300R	N300R00	311806012	203171000	311806012
Epidural intracranial abscess	Neuro	F0403-1	F040311	647071000006116	192743008	296919017
Bacterial causes of diseases classified elsewhere	other	A3BX	A3BX.00	286612014	87628006	145291019
Encephalitis due to mumps virus	Neuro	F0305	F030500	640971000006118	31646008	52880019
Congenital syphilitic meningitis	Neuro	A9042	A904200	11409014	6267005	11409014
Salmonella meningitis	Neuro	A0221	A022100	128872018	77645007	128872018
Leptospirosis icterohaemorrhagica	other	AA00	AA00.00	1773206014	398222003	1773206014
Aortitis - syphilitic	other	G767	G767.00	488611000006110	20735004	34885019
Tuberculous abscess of brain	Neuro	A133	A133.00	286262013	186217006	286262013
Other chronic osteomyelitis	Bone	N3017-1	N301711	359773014	240148003	359773014
Tuberculoma of meninges	Neuro	A131	A131.00	59684010	35786001	59684010
Cutaneous schistosomiasis	other	AC03	AC03.00	287729011	187115002	287729011
Met resist stap aureus cause disease class other chapters	other	A3BXK	A3BXK00	704851000006112	266096002	395344013
Tuberculous oophoritis or salpingitis	Genital	A166	A166.00	286292016	74181004	123189010
Acute perimetritis	Genital	K4103	K410300	80235012	48153009	80235012
Benign recurrent meningitis	Neuro	F024	F024.00	1234667016	81981006	1234667016
Cerebral intracranial abscess	Neuro	F0400	F040000	746661000006112	60404007	100367013
Chronic pyelonephritis with medullary necrosis	Pyelonephritis	K1001	K100100	304061014	197761005	304061014
Alveolitis of jaws	Bone	J0650	J065000	102715019	61804006	102715019
Tuberculosis of bones and joints	Bone	N3054	N305400	311921019	203272003	311921019
Other acute osteomyelitis	Bone	N3009	N300900	99455019	59867002	99455019
Gangrenous pneumonia	pneumonia	H5302	H530200	12652015	7063008	12652015
Actinomycosis unspecified site NOS	other	A39zz	A39zz00	286536015	11817007	20392016
Gonococcal infection of musculoskeletal system	Bone	A985	A985.00	494009014	44743006	494009014
Libman-Sacks disease	Cardiovascular	N0001	N000100	496853017	54072008	496853017
Caries of mastoid	bacterial URTI	F5310	F531000	12776016	7138005	12776016
Other acute osteomyelitis	Bone	N300K	N300K00	311801019	203166007	311801019
Herpes zoster meningitis	Neuro	F0112-1	F011211	1219080012	10491005	1219080012
Other and unspecified rheumatic heart disease	Cardiovascular	G1yz	G1yz.00	299633016	23685000	39767019
Liver echinococcus granulosus	other	AC20	AC20.00	739541000006115	20790006	34977010
Other osteomyelitis	Bone	N33z3	N33z300	104575013	62920004	104575013
Osteomyelitis, unspecified	Bone	N3023	N302300	311858018	60168000	99949018
Diphtheritic peritonitis	Peritonitis	A32y2	A32y200	23205013	13596001	23205013
Maternal tuberculosis,unspec whether in pregnancy/puerperium	other	L1730	L173000	715841000006111	199175001	306055013
Acute pneumococcal tonsillitis	bacterial URTI	H0350	H035000	301042011	195672007	301042011
Fusobacterial necrotising tonsillitis	bacterial URTI	A3830	A383000	360178015	240444009	360178015
Encephalitis in viral disease EC	Neuro	F030	F030.00	296836014	34476008	57546016
Tropical spastic paraplegia	other	F038	F038.00	494103012	714279000	3299127017
Tuberculosis of lung, confirmed by unspecified means	pneumonia	A1243	A124300	286242017	154283005	239551014
Tuberculosis of ear	other	A174	A174.00	286323019	186269001	286323019
Osteomyelitis, unspecified	Bone	N302R	N302R00	311880015	203232007	311880015
Pyogenic arthritis, unspecified	Bone	N01zB	N01zB00	309606018	396234004	1776215011
Syphilitic disseminated retinochoroiditis	other	A94y2	A94y200	129342012	77939001	129342012
Early symptomatic syphilis	other	A91	A91..00	287221010	186846005	287221010
Acute pericarditis - coxsackie	Cardiovascular	G5000	G500000	299878016	194905000	299878016
Tuberculosis of intrathoracic lymph nodes	other	A121	A121.00	130160016	78436002	130160016
Acute human immunodeficiency virus infection	other	A7880	A788000	365853018	111880001	179043011
Asymptomatic human immunodeficiency virus infection	other	A7881	A788100	152322017	91947003	152322017
Varicella with unspecified complications NOS	other	A52y	A52y.00	286694014	23737006	39855010
Hepatitis in other viral disease	Hepatobiliary	J6315	J631500	303497017	3738000	7302012
Other obstetric breast infection unspecified	Puerperal	L45y0	L45y000	307965014	200364001	307933011
Clostridium perfring/cause/diseases classfd/oth chapters	other	A3BXH	A3BXH00	569591000006117	65154009	108272018
Salmonella pneumonia	pneumonia	A0222	A022200	5303018	2523007	5303018
CD4 immune monitoring	other	43v	43v..00	2533306017	1018691000000100	2569581000000110
Epididymitis with no abscess	Genital	K2411	K241100	646911000006112	24712006	41416019
Machupo haemorrhagic fever	other	A7871	A787100	500681011	67247008	500681011
Septicaemic plague	other	A202	A202.00	508853016	9012003	508853016
Peritonitis due to urine	Peritonitis	J55y4	J55y400	1230007014	43633008	1230007014
Septic obstetric embolism	other	L433-2	L433.12	149011000006118	267284008	398448013
Tuberculosis of rectum	other	A14y4	A14y400	13280016	7444001	13280016
Unspecified pyelonephritis NOS	Pyelonephritis	K10yz	K10yz00	304090015	45816000	76408015
Tuberculous encephalitis or myelitis	Neuro	A136	A136.00	286265010	186220003	286265010
Chlamydial infection of anus and rectum	other	A78A2	A78A200	287038016	186731007	287038016
Empyema with fistula	pneumonia	H500	H500.00	406305010	271503005	406305010
Chagas' disease with other organ involvement	other	A861	A861.00	53255015	31877008	53255015
Unspecified trachoma	other	A76z	A76z.00	286928018	2576002	5391012
Chronic gonorrhoea lower genitourinary tract	other	A982	A982.00	287317017	186915005	287317017
Salpingo-oophoritis following abortive pregnancy	Genital	L0904	L090400	305547016	198824009	305547016
Acute secondary syphilitic meningitis	Neuro	A9180	A918000	287244013	186863009	287244013
Schistosoma spindale	other	AC0y3	AC0y300	48489010	10087007	17602018
Retromammary breast abscess	Puerperal	K3107	K310700	304604017	198107000	304604017
Viral hepatitis comp pregnancy, childbirth & the puerperium	Hepatobiliary	L1765	L176500	61281000006119	199203001	306085015
Pyothorax	pneumonia	H5016	H501600	1231844019	58554001	1231844019
Other intestinal helminthiases	other	AC7	AC7..00	287826014	26249004	43968010
Chagas' disease without mention of organ involvement	other	A862	A862.00	287176013	77506005	128665016
Acute pericarditis - streptococcal	Cardiovascular	G50z4	G50z400	459391000006113	194918008	299897016
Post BCG vaccination encephalitis	Neuro	F0340	F034000	296871014	192705005	296871014
Obstetric nipple infection NOS	Puerperal	L450z	L450z00	307943014	267289003	398454014
Other rheumatic heart disease NOS	Cardiovascular	G1yzz	G1yzz00	299636012	23685000	39767019
Tuberculosis of bones and joints	Bone	N3053	N305300	311920018	203271005	311920018
Acute and unspecified female pelvic peritonitis NOS	Peritonitis	K406z	K406z00	304693019	85051008	141009014
Other specified acute rheumatic fever	Cardiovascular	G0y	G0y..00	299577015	26424001	44256019
Acute gangrenous tonsillitis	bacterial URTI	H034	H034.00	301040015	195670004	301040015
Tuberculosis of prostate	other	A1650	A165000	34267015	20372007	34267015
Gonococcal synovitis	Muscle	A9851-1	A985111	360370018	240582004	360370018
Other specified helminthiasis NOS	other	AC8yz	AC8yz00	287855018	27601005	46186016
Pneumonia due to Eaton's agent	pneumonia	H230	H230.00	219821000006112	46970008	494705012
Exudative pleurisy NOS	pneumonia	H51z0	H51z000	301669013	196075003	301644013
India tick virus	other	A8211	A821100	782001000006112	186774005	287102014
Histoplasma capsulatum with meningitis	Neuro	AB401	AB40100	287614019	713624009	3290492019
E.coli pneumonia	pneumonia	H22y0-1	H22y011	633531000006116	51530003	1230992012
Melioidosis	other	A25	A25..00	2694404012	428111003	2694404012
Gambian trypanosomiasis	other	A863	A863.00	125910018	75809006	125910018
Other acute osteomyelitis	Bone	N300J	N300J00	311800018	203165006	311800018
Unspcfd staphlococ/cause/diseases classified/oth chapters	other	A3BX9	A3BX900	81271000006115	56038003	93212013
Pyogenic arthritis, unspecified	Bone	N0107	N010700	400161015	267882003	400161015
Pneumonia with Q-fever	pneumonia	H24y3	H24y300	220191000006115	32286006	1227932015
Intraspinal abscess NOS	Neuro	F041z	F041z00	296927014	1427008	3482014
Perinatal coagulase negative staphylococcus	other	Q40A3	Q40A300	234181000006114	309739005	453216017
Pyogenic arthritis, unspecified	Bone	N0107-1	N010711	483811000006116	20358003	34235018
Acute and fulminating melioidosis	other	A250	A250.00	286389018	186311005	286389018
General paresis - neurosyphilis	other	A941	A941.00	496158012	51928006	496158012
Other acute sinusitis NOS	bacterial URTI	H01yz	H01yz00	301014014	15805002	26785019
Syphilitic meningitis	Neuro	A942	A942.00	442332016	301086002	442332016
Obstetric nonpurulent mastitis - deliv with p/n complication	Puerperal	L4522	L452200	269241000006117	200382003	307958018
Chronic salpingitis and oophoritis NOS	Genital	K401z	K401z00	304663013	198142001	304659018
Plague meningitis	Neuro	A206	A206.00	286340011	186284005	286340011
Early syphilis, unspecified	other	A91X	A91X.00	634261000006113	186846005	287221010
Secondary syphilis of viscera or bone	other	A916	A916.00	395392013	266129004	395392013
Acute gonorrhoea upper genitourinary tract NOS	Genital	A981z	A981z00	287316014	50970007	84943016
Other spirochaetal infection NOS	other	AA4z	AA4z.00	287470012	41116009	492887012
Secondary syphilis of skin or mucus membranes	other	A913	A913.00	152431000006112	186850003	287226017
Bile duct calculus + other cholecystitis - obstruction NOS	Hepatobiliary	J644z	J644z00	511661000006111	30093007	50351011
Eaton's agent infection	other	A3By1	A3By100	634311000006118	406595002	2158243017
Osteomyelitis of vertebra	Bone	N300B	N300B00	311793016	203158003	311793016
Acute pericarditis - meningococcal	Cardiovascular	G5001	G500100	459361000006117	194906004	299879012
Syphilitic endocarditis of tricuspid valve	other	A9323	A932300	287260012	186877007	287260012
Late effects of tuberculosis NOS	other	AE0z	AE0z.00	287967017	187251001	287957010
Rocio virus disease	other	A626	A626.00	7583017	4464003	7583017
Acute necrotising encephalitis	Neuro	A4zy1	A4zy100	366130012	111897007	366130012
Sylvatic yellow fever	other	A600	A600.00	70261017	42100005	70261017
Acute suppurative otitis media due to disease EC	bacterial URTI	F5203	F520300	299065017	194282005	299065017
Diarrhoea due to staphylococcal toxin	Gastrointestinal	A0740-2	A074012	619831000006112	398384001	1777919019
Syphilitic endocarditis	other	A932	A932.00	111993011	67391006	111993011
Other acute osteomyelitis	Bone	N3005-3	N300513	1494968012	203170004	1494968012
Pneumonia with actinomycosis	pneumonia	H24y0	H24y000	220021000006118	195908008	301395017
Yellow fever unspecified	other	A60z	A60z.00	286800013	16541001	27986016
Gastrointestinal anthrax	Gastrointestinal	A222	A222.00	178993016	111798006	178993016
Meningitis due to fungal organisms	Neuro	F010	F010.00	706411000006116	24321005	40810012
Diverticulitis of the ileum	Diverticulitis	J5112	J511200	500628015	67153004	500628015
Bone and joint yaws lesions	other	AA26	AA26.00	395417016	266147005	395417016
Maduromycosis NOS	other	A39z0	A39z000	286534017	410038006	2471765010
Encephalomyelitis NOS	Neuro	F03y-1	F03y.11	641301000006119	62950007	104625019
Mosquito-borne viral encephalitis	Neuro	A62	A62..00	147223013	34476008	57546016
Diverticulitis of the jejunum	Diverticulitis	J5111	J511100	626681000006110	111358007	178594018
Paratrachoma	other	A770-1	A770.11	395363014	27020006	45193010
Pyogenic arthritis, unspecified	Bone	N0103	N010300	1229825015	267879008	400158016
[X]Meningitis due to other specified causes	Neuro	Fyu04	Fyu0400	299292015	7180009	12838019
Zoonotic bacterial disease NOS	other	A2z	A2z..00	286420015	23002003	38644016
Pyogenic arthritis, unspecified	Bone	N01z	N01z.00	780181000006118	396234004	1776215011
Other specified spirochaetal infection	other	AA4y	AA4y.00	287469011	41116009	492887012
Other acute osteomyelitis	Bone	N300V	N300V00	311810010	203175009	311810010
Osteomyelitis of vertebra	Bone	N300A	N300A00	311792014	203157008	311792014
Other chronic osteomyelitis	Bone	N3019	N301900	110702011	66634003	110702011
Tuberculosis papulonecrotica	other	A1707	A170700	68651015	41156006	68651015
Syphilitic aortic aneurysm	other	A930	A930.00	470121011	12232008	470121011
Ilheus virus encephalitis	Neuro	A62y-1	A62y.11	118083010	71105005	118083010
Secondary syphilis of vulva	other	A9135	A913500	87226019	52414005	87226019
Proteus(mirabilis)(morganii)cause/dis classfd/oth chapter	other	A3BXE	A3BXE00	197301000006117	312105006	455769015
Rheumatic myocarditis	Cardiovascular	G1y0	G1y0.00	299631019	194750008	299631019
Tuberculosis of bronchus	other	A113	A113.00	286220018	186178000	286220018
Endocarditis - typhoid	other	G5114	G511400	299915012	194929007	299915012
Cutaneous and mucocutaneous bartonellosis	other	A8801	A880100	287189019	186826000	287189019
[X]Herpesviral infection, unspecified	other	AyuA1	AyuA100	288150010	23513009	39485010
Tuberculosis of lung, confirmed histologically	pneumonia	A1242	A124200	286239011	186195008	286239011
[X]Intracranial+intraspinal abscess+granuloma in diseases CE	Neuro	Fyu0B	Fyu0B00	394441000006111	192737006	296909011
Pneumonia with ornithosis	pneumonia	H242	H242.00	220131000006119	81164001	134668017
Influenza with pneumonia, influenza virus identified	pneumonia	H2701	H270100	301413010	195878008	301357010
Tick-borne viral encephalitis	Neuro	A63	A63..00	102281000006117	34476008	57546016
Arthropathy with other viral disease, of pelvic region/thigh	other	N0155	N015500	493301000006110	239780003	359269012
Pretibial fever	other	AA0yz-2	AA0yz12	503550011	26275000	44006019
[X]Human immunodeficiency virus disease	other	AyuC	AyuC.00	288173019	86406008	143288017
Acute ulcerative laryngitis	Viral URTI	H0401	H040100	301053017	195681001	301053017
Puerperal endometritis - delivered with postnatal comp	Puerperal	L4001	L400100	200661000006111	200181000	307666012
Human immunodeficiency virus with other clinical findings	other	A788y	A788y00	287020019	86406008	143288017
Chronic dry pleurisy	pneumonia	H5106	H510600	301651016	196080007	301651016
Puerperal salpingitis NOS	Puerperal	L401z	L401z00	307674013	20932005	35192019
Tuberculosis of bone	Bone	N3051	N305100	311918016	203269005	311918016
Bordetella bronchiseptica	bacterial URTI	A33y0	A33y000	18451012	27836007	46586010
Diverticulitis of the large intestine NOS	Diverticulitis	J5117	J511700	303144015	4494009	7629011
Extradural intraspinal abscess	Neuro	F0411	F041100	1232479011	63627007	1232479011
Bacterial meningitis NOS	Neuro	F00z	F00z.00	296803013	95883001	158829010
Pneumoconiosis associated with tuberculosis	other	H450	H450.00	301563019	196017002	301563019
Gallbladder calculus with acute cholecystitis +no obstruct	Hepatobiliary	J6400	J640000	797961000006111	197377009	303541018
Arenaviral haemorrhagic fever	other	A787	A787.00	502521011	73730005	502521011
Rheumatic chorea without mention of heart involvement	Cardiovascular	G021	G021.00	168411000006110	46826000	78053017
Other cholecystitis OS	Hepatobiliary	J651y	J651y00	303582018	76581006	127173011
Simian B disease	Neuro	A543-1	A543.11	60774011	36420002	60774011
[truncated: 672 more rows]
