# Supplementary material for: Harmonising Definitions of Multiple Long Terms Conditions for Inflammation Research: A Co-Production Approach
Source: Research Square preprint supplement (doi:10.21203/rs.3.rs-7773449/v1), 2025-10-29
Supplement: Supplementary file 2 [file 11962a828b7bebe53bf681a6.xlsx]

## Sheet: sheet 1
CODING	Term used	Condition1	Condition2	Parent condition
264008	Blind hypertensive eye	Visual disturbances and blindness	Hypertensive diseases	2
9386003	Gouty neuritis	polyneuropathies	Inflammatory polyarthropathies	2
9631008	Other rheumatoid arthritis of spine	Inflammatory polyarthropathies	Ankylosing spondylitis	2
12023003	[X]Other rheumatic aortic valve diseases	Other forms of heart disease	Chronic rheumatic heart diseases	2
19514005	Arthritis mutilans	Psoriasis	Inflammatory polyarthropathies	2
23022004	Tuberculous bronchiectasis	Tuberculosis	Chronic lower respiratory diseases	1
31712002	Primary biliary cirrhosis	Diseases of the liver	Disorders of gallbladder, biliary tract and pancreas	1
31992008	Secondary hypertension	Gastro-oesophageal reflux, peptic ulcer disease, gastritis and duodeniti	Hypertensive diseases	2
33339001	Psoriatic arthropathy	Psoriasis	Inflammatory polyarthropathies	2
39621005	Other gallbladder disorders	Tuberculosis	Disorders of gallbladder, biliary tract and pancreas	2
43959009	Insulin dependent diabetes mellitus with diabetic cataract	Diabetes	Cataract	2
49455004	Diabetes mellitus with polyneuropathy	Diabetes	polyneuropathies	2
51002006	Secondary pancreatic diabetes mellitus	Diabetes	Disorders of gallbladder, biliary tract and pancreas	1
64715009	Hypertensive heart disease NOS with CCF	Other forms of heart disease	Hypertensive diseases	1
67696008	Rheumatic tricuspid regurgitation	Other forms of heart disease	Chronic rheumatic heart diseases	2
78667006	[x]depressive personality disorder	Mood disorders	Neurotic, stress-related and somatoform disorders	2
79619009	Mitral stenosis	Other forms of heart disease	Chronic rheumatic heart diseases	1
83105008	Malignant hypertensive heart disease with congestive cardiac failure	Other forms of heart disease	Hypertensive diseases	2
84760002	[X]Schizoaffective disorder, depressive type	Schizophrenia	Mood disorders	1
92812005	Chronic leukaemia NOS	Malignant neoplasms, stated or presumed to be primary, of lymphoid, haematopoietic and related tissue	Malignant neoplasms	1
109888004	Lobular carcinoma in situ of breast	Malignant neoplasms	In situ neoplasms	1
109889007	Intraductal carcinoma in situ of breast	Malignant neoplasms	In situ neoplasms	1
111830007	Tuberculosis of other urinary organs	Tuberculosis	Inflammatory diseases of the female pelvic organs	1
118600007	Malignant neoplasms of lymphoid and histiocytic tissue NOS	Malignant neoplasms	Malignant neoplasms, stated or presumed to be primary, of lymphoid, haematopoietic and related tissue	2
118612006	Malignant histiocytosis	Malignant neoplasms	Malignant neoplasms, stated or presumed to be primary, of lymphoid, haematopoietic and related tissue	2
127014009	Diabetic peripheral angiopathy	Disease of arteries, arterioles and capilleries	Diabetes	1
127024001	[M]Pituitary adenoma or carcinoma NOS	Malignant neoplasms	In situ neoplasms	1
186270000	Tuberculosis of adrenal glands - Addison's disease	Addison's disease	Tuberculosis	2
188691005	Malignant immunoproliferative small intestinal disease	Malignant neoplasms	Malignant neoplasms, stated or presumed to be primary, of lymphoid, haematopoietic and related tissue	1
188734009	Chronic neutrophilic leukaemia	Malignant neoplasms, stated or presumed to be primary, of lymphoid, haematopoietic and related tissue	Malignant neoplasms	1
189336000	Carcinoma in situ breast	Malignant neoplasms	In situ neoplasms	2
191455000	Presenile dementia with depression	Dementia	Mood disorders	1
191459006	Senile dementia with depression	Dementia	Mood disorders	1
191466007	Arteriosclerotic dementia with depression	Dementia	Mood disorders	1
193141005	Diabetic mononeuritis multiplex	Diabetes	polyneuropathies	2
193178008	Polyneuropathy in disseminated lupus erythematosus	Systemic connective tissue disorders	polyneuropathies	2
193180002	Polyneuropathy in rheumatoid arthritis	polyneuropathies	Inflammatory polyarthropathies	2
193183000	Acute painful diabetic neuropathy	Diabetes	polyneuropathies	2
193184006	Chronic painful diabetic neuropathy	Diabetes	polyneuropathies	2
193185007	Asymptomatic diabetic neuropathy	Diabetes	polyneuropathies	2
194726006	Mitral stenosis with incompetence	Other forms of heart disease	Chronic rheumatic heart diseases	1
194741006	Rheumatic tricuspid stenosis and insufficiency	Other forms of heart disease	Chronic rheumatic heart diseases	2
194767001	Benign hypertensive heart disease with congestive cardiac failure	Other forms of heart disease	Hypertensive diseases	2
194779001	Hypertensive heart and renal disease with (congestive) heart failure	Other forms of heart disease	Hypertensive diseases	1
194781004	Hypertensive heart and renal disease with both (congestive) heart failure and renal failure	Other forms of heart disease	Hypertensive diseases	1
195302000	Gangrene of toe	Disease of arteries, arterioles and capilleries	Diabetes	1
195303005	Gangrene of foot	Disease of arteries, arterioles and capilleries	Diabetes	1
197441003	Primary sclerosing cholangitis	Diseases of the liver	Disorders of gallbladder, biliary tract and pancreas	1
200956002	Psoriasis spondylitica	Psoriasis	Inflammatory polyarthropathies	2
201250006	Ischaemic ulcer diabetic foot	Disease of arteries, arterioles and capilleries	Diabetes	1
201251005	Neuropathic diabetic ulcer - foot	Diabetes	polyneuropathies	2
201724008	Diabetic neuropathic arthropathy	Diabetes	polyneuropathies	2
201727001	Arthropathy in ulcerative colitis	Noninfective enteritis and colitis	Inflammatory polyarthropathies	2
201728006	Arthropathy in Crohn's disease	Noninfective enteritis and colitis	Inflammatory polyarthropathies	2
230572002	Diabetes + neuropathy	Diabetes	polyneuropathies	2
230577008	insulin dependent diabetes mellitus with mononeuropathy	Diabetes	polyneuropathies	2
231485007	[X]Post-schizophrenic depression	Schizophrenia	Mood disorders	2
231504006	Anxiety with depression	Mood disorders	Neurotic, stress-related and somatoform disorders	2
233683003	Hay fever with asthma	Rhinitis and Sinusitis	Chronic lower respiratory diseases	2
239812005	Distal interphalangeal psoriatic arthropathy	Psoriasis	Inflammatory polyarthropathies	2
265480000	Annuloplasty of tricuspid valve	Other forms of heart disease	Gastro-oesophageal reflux, peptic ulcer disease, gastritis and duodeniti	1
268957000	Psychotic condition, insight present	Schizophrenia	Neurotic, stress-related and somatoform disorders	2
275524009	Immunoproliferative neoplasm	Malignant neoplasms	Malignant neoplasms, stated or presumed to be primary, of lymphoid, haematopoietic and related tissue	2
302836005	[M]Lentigo maligna	Malignant neoplasms	In situ neoplasms	2
314902007	Non-insulin-dependent diabetes mellitus with peripheral angiopathy	Disease of arteries, arterioles and capilleries	Diabetes	1
314904008	Type II diabetes mellitus with neuropathic arthropathy	Diabetes	polyneuropathies	2
315287002	Diab mellit insulin-glucose infus acute myocardial infarct	Ischaemic heart diseases	Diabetes	1
363346000	human immunodeficiency virus with secondary cancers	HIV disease	Malignant neoplasms	2
389145006	Extrinsic asthma - atopy	Chronic lower respiratory diseases	Dermatitis and eczema	2
417677008	O/E - sight threatening diabetic retinopathy	Diabetes	Visual disturbances and blindness	2
420436000	type 2 diabetes mellitus with mononeuropathy	Diabetes	polyneuropathies	2
420524008	HIV disease resulting in Kaposi's sarcoma	HIV disease	Malignant neoplasms	2
420756003	Type II diabetes mellitus with diabetic cataract	Diabetes	Cataract	2
420825003	Type 1 diabetes mellitus with gangrene	Disease of arteries, arterioles and capilleries	Diabetes	1
420918009	type 1 diabetes mellitus with mononeuropathy	Diabetes	polyneuropathies	2
421365002	Diabetes mellitus, juvenile +peripheral circulatory disorder	Disease of arteries, arterioles and capilleries	Diabetes	1
421631007	Diabetes mellitus, adult with gangrene	Disease of arteries, arterioles and capilleries	Diabetes	1
421895002	Peripheral vascular disorder due to diabetes mellitus	Disease of arteries, arterioles and capilleries	Diabetes	1
421920002	type i diabetes mellitus with diabetic cataract	Diabetes	Cataract	2
422166005	Diabetes mellitus, adult, + peripheral circulatory disorder	Disease of arteries, arterioles and capilleries	Diabetes	1
422275004	Diabetes mellitus with gangrene	Disease of arteries, arterioles and capilleries	Diabetes	1
433147009	Combined visual and hearing impairment	Visual disturbances and blindness	Conductive and sensorineural hearing loss	both
442537007	HIV dis resulting oth types of non-Hodgkin's lymphoma	HIV disease	Malignant neoplasms, stated or presumed to be primary, of lymphoid, haematopoietic and related tissue	2
713705003	type 1 diabetes mellitus with polyneuropathy	Diabetes	polyneuropathies	2
713706002	Type II diabetes mellitus with polyneuropathy	Diabetes	polyneuropathies	2
713897006	HIV disease resulting in Burkitt's lymphoma	HIV disease	Malignant neoplasms, stated or presumed to be primary, of lymphoid, haematopoietic and related tissue	2
31211000119101	Type 1 diabetes mellitus with peripheral angiopathy	Disease of arteries, arterioles and capilleries	Diabetes	1
71771000119100	type i diabetes mellitus with neuropathic arthropathy	Diabetes	polyneuropathies	2
542621000000109	immunoproliferative neoplasm or myeloma nos	Malignant neoplasms	Malignant neoplasms, stated or presumed to be primary, of lymphoid, haematopoietic and related tissue	2
198241002	Female tuberculous pelvic inflammatory disease	Inflammatory diseases of the female pelvic organs	Tuberculosis	2
35585004	Tuberculous endometritis	Inflammatory diseases of the female pelvic organs	Tuberculosis	2
49558004	Fallopian tube tuberculosis	Inflammatory diseases of the female pelvic organs	Tuberculosis	2
