# Supplementary material for: Harmonising Definitions of Multiple Long Terms Conditions for Inflammation Research: A Co-Production Approach
Source: Research Square preprint supplement (doi:10.21203/rs.3.rs-7773449/v1), 2025-10-29
Supplement: Supplementary file 3 [file 5ecf7517a39e4e62ec64adad.docx]

Supplementary File

**Figure S1: Figure S1. Hierarchical visualization of the 60 InflAIM MLTC conditions. A fully interactive version is available at** [**https://inflaim-study.github.io/Inflaim_MLTC_paper/Supplementary%20figures/Fig_S1/**](https://inflaim-study.github.io/Inflaim_MLTC_paper/Supplementary%20figures/Fig_S1/) **(archived at Zenodo, DOI: 10.5281/zenodo.17153086).**


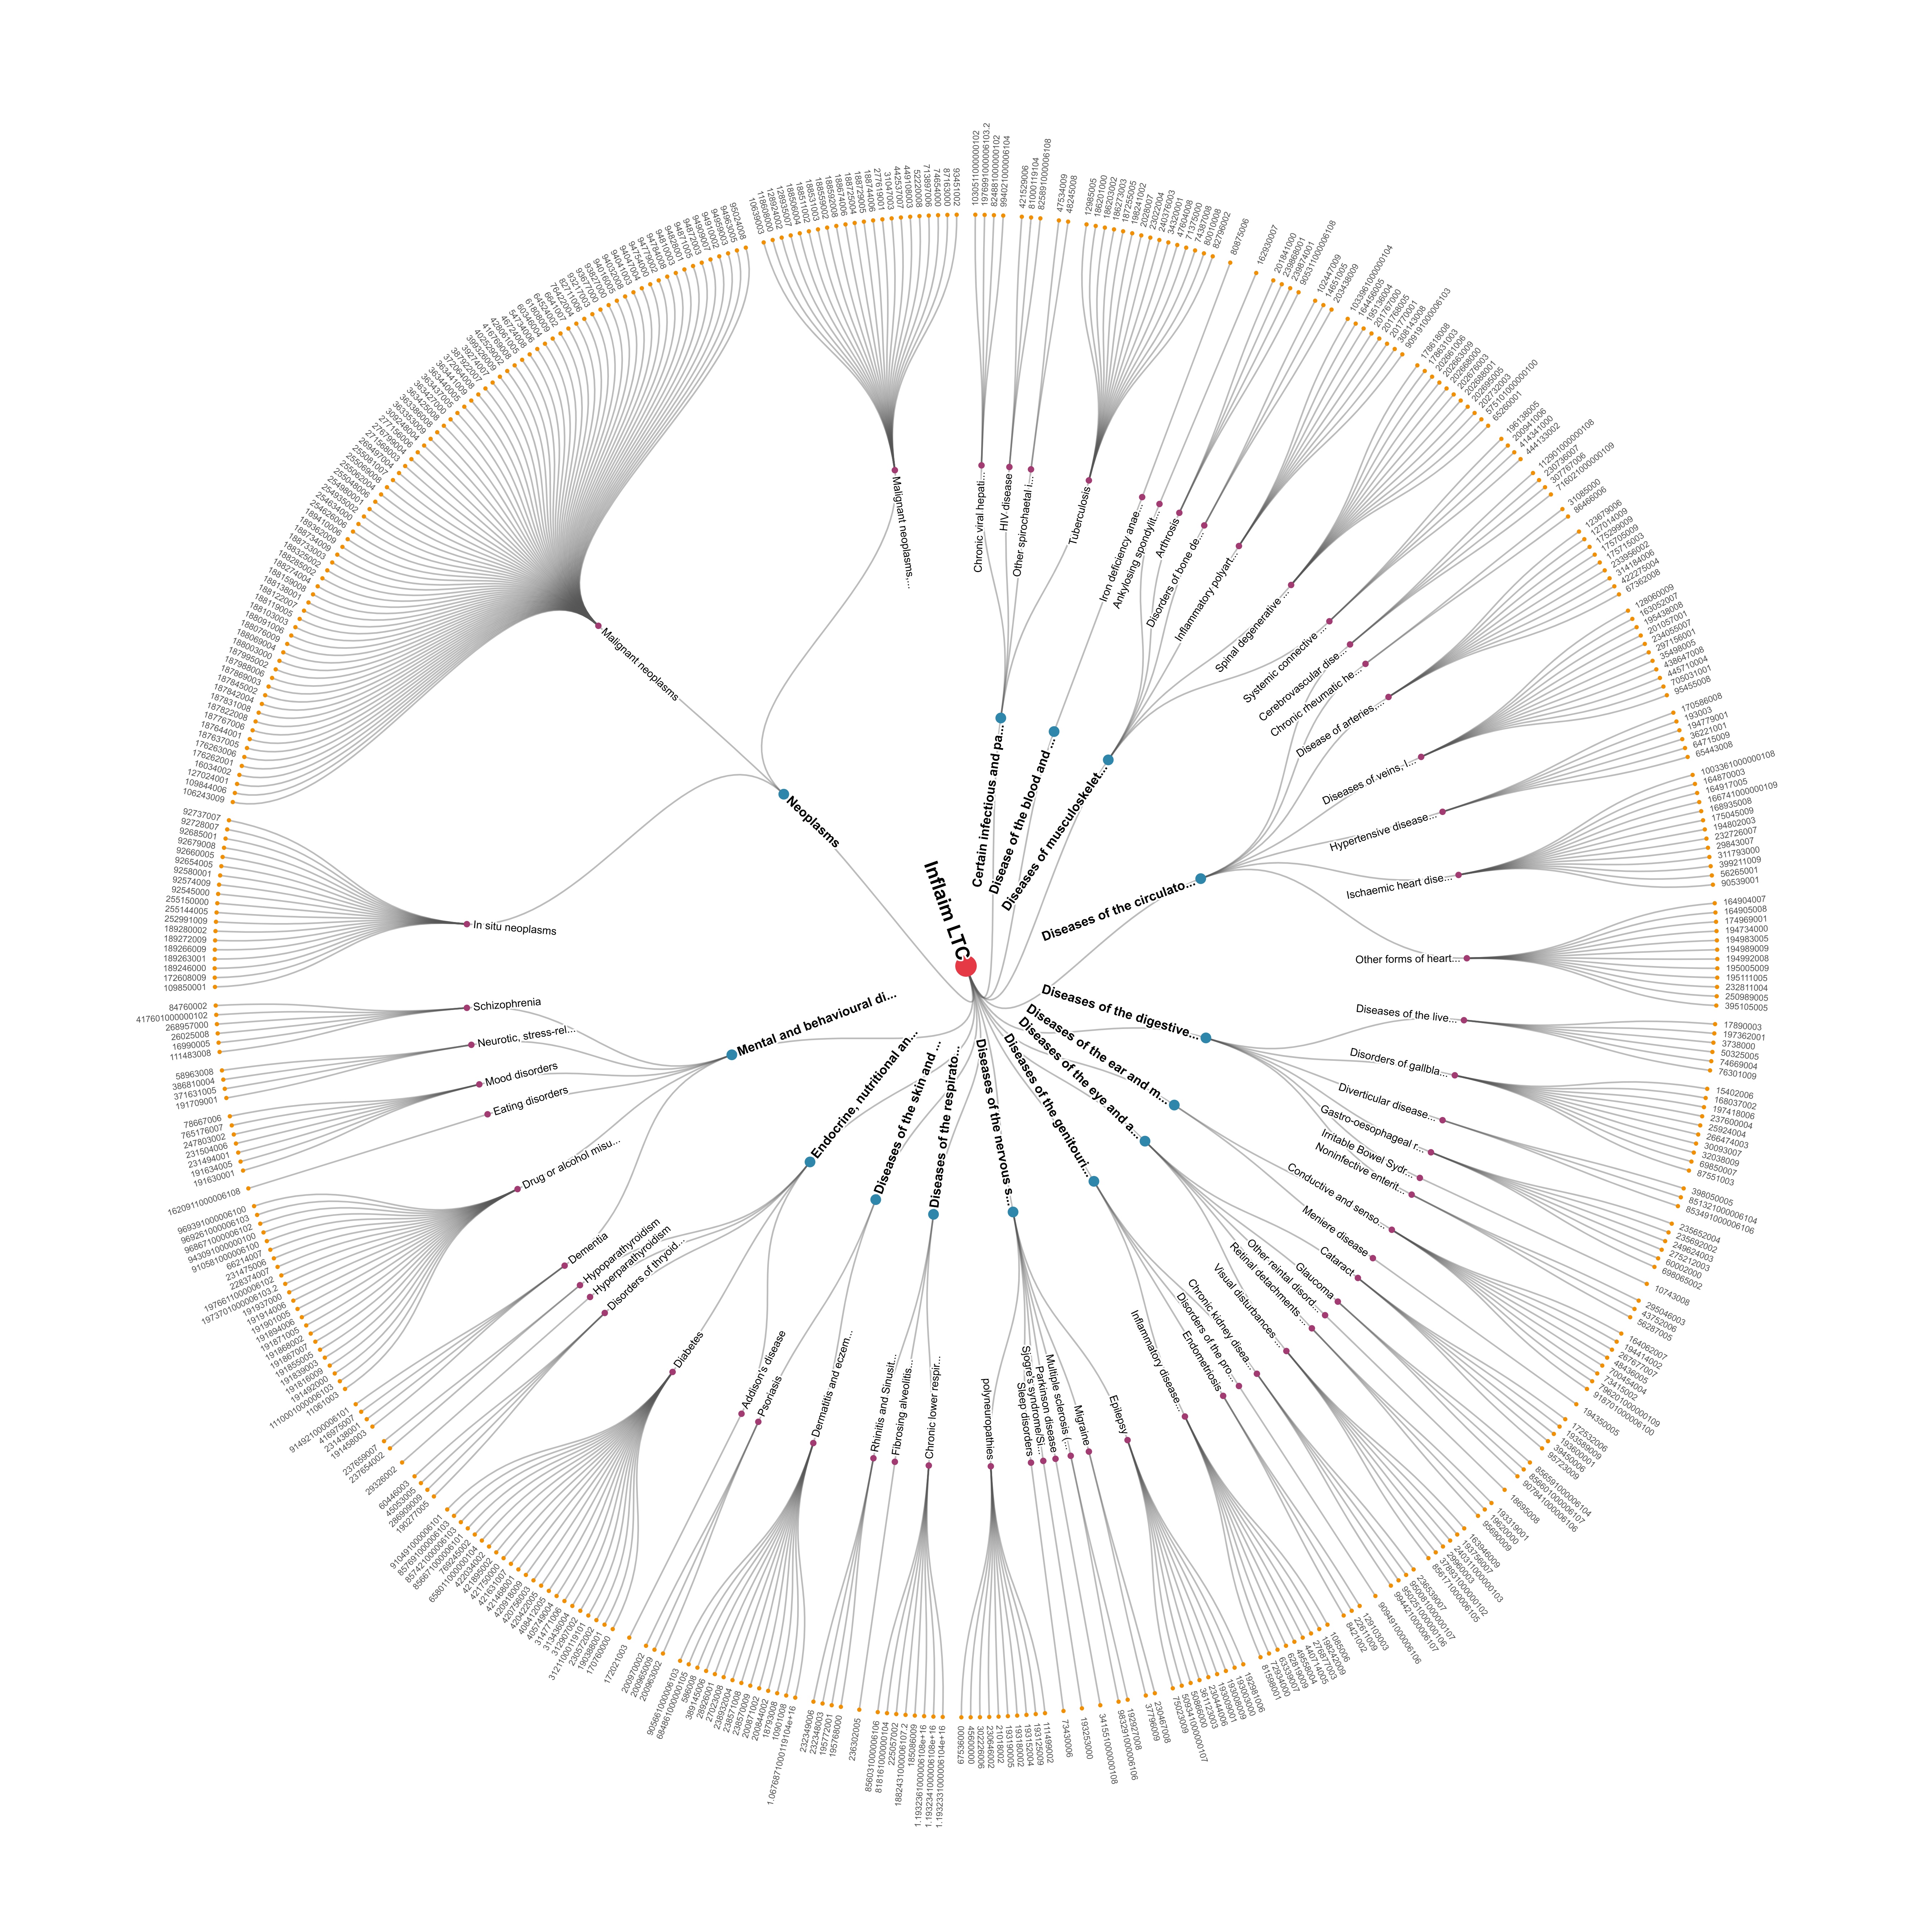


*The hierarchy is delineated from high-level International Classification of Diseases (ICD-10) chapters (blue nodes) down to the 60 specific LTCs (purple nodes). Each condition terminates in its constituent SNOMED CT codes, a 10% representative sample of which is displayed to demonstrate the distribution of code lists across all the conditions while maintaining visual clarity.
