# Supplementary material for: Harmonising Definitions of Multiple Long Terms Conditions for Inflammation Research: A Co-Production Approach
Source: Research Square preprint supplement (doi:10.21203/rs.3.rs-7773449/v1), 2025-10-29
Supplement: Supplementary file 4 [file cd2b391ffe2602a583e5f1fc.xlsx]

## Sheet: Supplementary file, Table 2 Aut
Autoimmune Condition	Autoimmune Site	CPRD Read Code	Original Read Code	Cleansed Read Code	Med Code ID	Snomed CT Concept ID	Snomed CT Description ID
Psoriatic arthropathy	seronegative arthritis	M160.00	M160	M160.00	55627011	33339001	55627011
Crohn's disease	inflammatory bowel disease	J40..11	J40-1	J40..11	56765016	34000006	56765016
Ulcerative colitis	inflammatory bowel disease	J410100	J4101	J410100	107644019	64766004	107644019
Rheumatic fever without mention of heart involvement	cardiovascular	G0...00	G0	G0...00	44257011	26424001	44257011
Morphoea	scleroderma	M210300	M2103	M210300	308867019	201049004	308867019
Rheumatoid arthritis	rheumatoid	N040.00	N040	N040.00	116082011	69896004	116082011
Polymyalgia rheumatica	polymyalgia	N20..00	N20	N20..00	108529013	65323003	108529013
Henoch-Schonlein purpura	vasculitis	D310000	D3100	D310000	294337012	191306005	294337012
Vasculitis	vasculitis	G76B.00	G76B	G76B.00	53457013	31996006	53457013
Polyarteritis nodosa	vasculitis	G750.00	G750	G750.00	242065019	155441006	242065019
Colitis - noninfective	inflammatory bowel disease	J4...11	J4-1	J4...11	572041000006116	14066009	23955011
Ulcerative colitis and/or proctitis	inflammatory bowel disease	J41..12	J41-2	J41..12	85931000006112	295046003	435370011
Inflammatory bowel disease	inflammatory bowel disease	J4...12	J4-2	J4...12	41137017	24526004	41137017
Nephrotic syndrome with membranous glomerulonephritis	renal	K011.00	K011	K011.00	303826014	197590001	303826014
Spondylitis NOS	seronegative arthritis	N10z.00	N10z	N10z.00	311045018	84172003	139589017
Acute glomerulonephritis	renal	K00..00	K00	K00..00	32619017	19351000	32619017
Ankylosing spondylitis	seronegative arthritis	N100.00	N100	N100.00	16833013	9631008	16833013
Reiter's syndrome	seronegative arthritis	A993.11	A993-1	A993.11	111690011	67224007	111688010
Nephrotic syndrome in diabetes mellitus	renal	K01x100	K01x1	K01x100	303846016	197605007	303846016
Diabetic nephropathy	renal	C104.11	C104-1	C104.11	205225016	127013003	205225016
Pemphigoid	pemphigus & pemphigoid	M145.00	M145	M145.00	142845014	86142006	142845014
Nephritis, nephrosis and nephrotic syndrome	renal	K0...00	K0	K0...00	303806010	197577008	303806010
Nephrotic syndrome	renal	K01..00	K01	K01..00	86957016	52254009	86957016
Polymyalgia	polymyalgia	N20..11	N20-1	N20..11	158050019	65323003	108529013
Temporal arteritis	polymyalgia	G755100	G7551	G755100	1779388019	400130008	1779388019
Scleroderma	scleroderma	N001.00	N001	N001.00	309413012	89155008	147835019
Sarcoidosis	sarcoid	AD5..00	AD5	AD5..00	52728016	31541009	52728016
Reactive arthropathy, unspecified	seronegative arthritis	N01w.00	N01w	N01w.00	309560018	239783001	359275015
Lupus erythematosus	lupus	M154.00	M154	M154.00	308697013	200936003	308697013
Juvenile rheumatoid arthritis - Still's disease	rheumatoid	N043.00	N043	N043.00	755441000006119	410795001	2472447010
Arteritis unspecified	vasculitis	G766.00	G766	G766.00	395799018	52089001	86704014
Chronic focal glomerulonephritis	renal	K02y200	K02y2	K02y200	303867016	197618004	303867016
Wegener's granulomatosis	vasculitis	G754.00	G754	G754.00	300579010	195353004	300579010
Nephritis and nephropathy unspecified	renal	K03..11	K03-1	K03..11	396707019	52845002	87940013
Dermatomyositis	dermatomyositis	N003.00	N003	N003.00	1776211019	396230008	1776211019
Idiopathic proctocolitis	inflammatory bowel disease	J41..00	J41	J41..00	2579429013	64766004	2579429013
Unspecified glomerulonephritis NOS	renal	K03z.00	K03z	K03z.00	303907019	36171008	60355017
Nodular vasculitis	vasculitis	M152.11	M152-1	M152.11	91895012	55275006	91895012
Membranous nephritis unspecified	renal	K031.00	K031	K031.00	303875010	77182004	128137019
Rheumatic chorea without heart involvement	cardiovascular	G02..00	G02	G02..00	78053017	46826000	78053017
Acute nephritis	renal	K00..11	K00-1	K00..11	102173012	61503006	102173012
Noninfective enteritis and colitis	inflammatory bowel disease	J4...00	J4	J4...00	585591000006118	307418008	450679011
Myositis unspecified	dermatomyositis	N241100	N2411	N241100	311701010	26889001	44991019
Primary biliary cirrhosis	liver	J616000	J6160	J616000	52980015	31712002	52980015
Rheumatoid nodule	rheumatoid	N042200	N0422	N042200	485614018	33719002	485614018
Kawasaki disease	vasculitis	G751000	G7510	G751000	124653012	75053002	124653012
Crohn's colitis	inflammatory bowel disease	J401z11	J401z-1	J401z11	601031000006119	50440006	1230866018
Ulcerative proctocolitis	inflammatory bowel disease	J410.00	J410	J410.00	435370011	295046003	435370011
Seronegative rheumatoid arthritis	seronegative arthritis	N040P00	N040P	N040P00	359292012	239792003	359292012
Other juvenile arthritis	seronegative arthritis	N045.00	N045	N045.00	309829012	239796000	359297018
Relapsing polychondritis	vasculitis	N33z500	N33z5	N33z500	120088018	72275000	120088018
Lupus erythematosus NOS	lupus	M154z00	M154z	M154z00	308709013	200936003	308697013
Chronic glomerulonephritis	renal	K02..00	K02	K02..00	35171019	20917003	35171019
Systemic lupus erythematosus	lupus	N000.00	N000	N000.00	92208011	55464009	92208011
Autoimmune chronic active hepatitis	liver	J614111	J6141-1	J614111	303404016	197284004	303404016
Postdysenteric reactive arthropathy	seronegative arthritis	N013.00	N013	N013.00	217651000006113	56528004	497640014
Reiter's disease / syndrome	seronegative arthritis	A993.00	A993	A993.00	179891000006115	67224007	111688010
Non-infective colitis NOS	inflammatory bowel disease	J4z3.00	J4z3	J4z3.00	303051014	14066009	23955011
Ulcerative proctitis	inflammatory bowel disease	J410300	J4103	J410300	496249010	52231000	496249010
Flare of rheumatoid arthritis	rheumatoid	N040T00	N040T	N040T00	309816012	201791009	309816012
Rheumatoid arthritis with involvement of oth organs and sys	rheumatoid	N042000	N0420	N042000	39771016	23685000	39771016
Localised dermatosclerosis	scleroderma	M210100	M2101	M210100	308864014	201048007	308864014
Crohn's disease of the small bowel NOS	inflammatory bowel disease	J400z00	J400z	J400z00	302941017	56689002	94270018
Acute interstitial nephritis	renal	K08y500	K08y5	K08y500	47940012	28637003	47940012
Seropositive errosive rheumatoid arthritis	rheumatoid	N047.00	N047	N047.00	451461014	308143008	3517964017
Non-infective ileitis NOS	inflammatory bowel disease	J4z2.00	J4z2	J4z2.00	303050010	51151007	85221013
Nephrotic syndrome with proliferative glomerulonephritis	renal	K010.00	K010	K010.00	303825013	197589005	303825013
Cranial arteritis	polymyalgia	G755000	G7550	G755000	1787109017	400130008	1787109017
Bullous pemphigoid	pemphigus & pemphigoid	M145000	M1450	M145000	127980014	77090002	127980014
Vasculitis limited to skin, unspecified	vasculitis	M2y0X00	M2y0X	M2y0X00	65971000006112	53312001	88651012
Giant cell arteritis	polymyalgia	G755.00	G755	G755.00	2534171012	414341000	2534171012
Nephritis - chronic	renal	K02..11	K02-1	K02..11	677941000006114	197707007	304004016
Chronic membranous glomerulonephritis	renal	K021.00	K021	K021.00	555201000006116	77182004	128137019
CDAI - Crohn's disease activity index	inflammatory bowel disease	ZR3S.11
Regional enteritis - Crohn's disease	inflammatory bowel disease	J40..00	J40	J40..00	179501000006113	34000006	485713019
Crohn's disease activity index	inflammatory bowel disease	ZR3S.00
Lipodermatosclerosis	scleroderma	M2y0500	M2y05	M2y0500	742821000006115	410016009	2471746019
Pouchitis	inflammatory bowel disease	J435.00	J435	J435.00	198441000000117	426508001	2674151012
Nephropathy, unspecified	renal	K03..12	K03-2	K03..12	354320010	90708001	150322011
Nephropathy - chronic	renal	K02..12	K02-2	K02..12	678061000006111	90708001	150322011
Systemic lupus erythematosus with organ or sys involv	lupus	N000400	N0004	N000400	453243010	309762007	453243010
Seropositive rheumatoid arthritis, unspecified	rheumatoid	N04X.00	N04X	N04X.00	149911000006117	239791005	359291017
Membranoproliferative nephritis unspecified	renal	K032.00	K032	K032.00	303876011	52845002	87940013
Psoriatic arthropathy NOS	seronegative arthritis	M160z00	M160z	M160z00	308730016	33339001	55627011
Juvenile arthritis in Crohn's disease	inflammatory bowel disease	N045300	N0453	N045300	309833017	201805000	309833017
Type 2 diabetes mellitus with nephropathy	renal	C10FC00	C10FC	C10FC00	914261000006119	420279001	3035432019
Rheumatic fever without mention of heart involvement	cardiovascular	G0z..00	G0z	G0z..00	299578013	26424001	44256019
Chronic glomerulonephritis NOS	renal	K02z.00	K02z	K02z.00	303870017	20917003	35171019
Progressive myositis ossificans	dermatomyositis	N231100	N2311	N231100	137233019	82725007	137233019
Rheumatic diseases of endocardium, valve unspecified	cardiovascular	G14z.00	G14z	G14z.00	395750017	48872007	81438018
Idiopathic proctocolitis NOS	inflammatory bowel disease	J41z.00	J41z	J41z.00	302962016	64766004	2579429013
Pemphigus	pemphigus & pemphigoid	M144.00	M144	M144.00	108297019	65172003	108297019
Primary sclerosing cholangitis	liver	J661700	J6617	J661700	303614019	197441003	303614019
Polymyositis	dermatomyositis	N004.00	N004	N004.00	52463013	31384009	52463013
Dermatitis vegetans	pemphigus & pemphigoid	M07y200	M07y2	M07y200	25148011	14800001	25148011
Non-infective sigmoiditis NOS	inflammatory bowel disease	J4z4.00	J4z4	J4z4.00	303052019	235765004	353430013
Regional ileocolitis	inflammatory bowel disease	J402.00	J402	J402.00	302946010	196983007	302946010
Nephritis, nephrosis and nephrotic syndrome NOS	renal	K0z..00	K0z	K0z..00	304058013	90708001	150315015
Proliferative nephritis unspecified	renal	K030.00	K030	K030.00	303874014	52845002	87940013
Behcet's syndrome	vasculitis	AD61.00	AD61	AD61.00	454287012	310701003	454287012
Orbital myositis	dermatomyositis	F4G1200	F4G12	F4G1200	133866014	80698001	133866014
Nephrotic syndrome, diffuse crescentic glomerulonephritis	renal	K01B.00	K01B	K01B.00	303839013	197600002	303839013
Rheumatoid arthrit. monitoring	rheumatoid	66H..13	66H-3	66H..13	219021000000114	275902004	411871019
Arthropathy in ulcerative colitis	inflammatory bowel disease	N031000	N0310	N031000	309743013	201727001	309743013
CREST syndrome	scleroderma	N001100	N0011	N001100	53211014	31848007	53211014
Benign pemphigus NOS	pemphigus & pemphigoid	M145100	M1451	M145100	308661016	200902009	308653014
Juvenile pemphigoid	pemphigus & pemphigoid	M142.11	M142-1	M142.11	358098014	238941009	358098014
Rheumatoid bursitis	rheumatoid	N040Q00	N040Q	N040Q00	309812014	84017003	139318017
Juvenile polyarteritis	vasculitis	G759.00	G759	G759.00	300593015	195363007	300593015
Autoimmune hepatitis	liver	J63B.00	J63B	J63B.00	2159899016	408335007	2159899016
Aortic arch arteritis	vasculitis	G757.11	G757-1	G757.11	475140019	359789008	475138012
Nephrotic syndrome, diffuse membranous glomerulonephritis	renal	K016.00	K016	K016.00	303834015	197595006	303834015
Disseminated lupus erythematosus	lupus	N000000	N0000	N000000	92209015	55464009	92209015
Acute glomerulonephritis in diseases EC	renal	K00y000	K00y0	K00y000	303816019	197582001	303816019
Bright's disease	renal	K00..12	K00-2	K00..12	354351015	61503006	102173012
Acute glomerulonephritis NOS	renal	K00z.00	K00z	K00z.00	303824012	19351000	32619017
Rheumatic chorea without heart involvement	cardiovascular	G02..11	G02-1	G02..11	78055012	46826000	78055012
Other non-infective gastroenteritis and colitis NOS	inflammatory bowel disease	J43z.00	J43z	J43z.00	396366011	25374005	42550011
Cryoglobulinaemic vasculitis	vasculitis	C332100	C3321	C332100	293373010	190815001	293373010
Arthropathy in Crohn's disease	inflammatory bowel disease	N031100	N0311	N031100	309744019	201728006	309744019
Hypersensitivity angiitis	vasculitis	G752.00	G752	G752.00	100606014	60555002	100606014
Inflammatory polyarthropathy	seronegative arthritis	N04..11	N04-1	N04..11	2548331017	417373000	2548331017
Crohn's disease of the large bowel NOS	inflammatory bowel disease	J401z00	J401z	J401z00	396357012	7620006	13585013
Chronic nephritic syndrome	renal	K0A3.00	K0A3	K0A3.00	304004016	197707007	304004016
Rheumatoid arthritis of shoulder	rheumatoid	N040200	N0402	N040200	309789018	201766009	309789018
Berger's IgA or IgG nephropathy	renal	K032600	K0326	K032600	303884010	197632002	303884010
Arthritis mutilans	seronegative arthritis	M160200	M1602	M160200	32869011	19514005	32869011
Pauciarticular juvenile rheumatoid arthritis	rheumatoid	N043200	N0432	N043200	123542016	74391003	502690012
Churg-Strauss vasculitis	vasculitis	G758.00	G758	G758.00	557151000006115	82275008	136476013
Thrombotic thrombocytopenic purpura	vasculitis	G756100	G7561	G756100	129661016	78129009	129661016
Nephrotic syn difus mesangial prolifertiv glomerulonephritis	renal	K017.00	K017	K017.00	677461000006115	197596007	303835019
Nephrotic syn,diffuse mesangiocapillary glomerulonephritis	renal	K019.00	K019	K019.00	677471000006110	197598008	303837010
Lupus nephritis	lupus	K01x411	K01x4-1	K01x411	114310015	68815009	114310015
Cerebral arteritis	vasculitis	G674.00	G674	G674.00	47484015	28366008	47484015
Exacerbation of ulcerative colitis	inflammatory bowel disease	J410400	J4104	J410400	2532953017	414156000	2532953017
Reactive arthropathies	seronegative arthritis	N038.00	N038	N038.00	192631000006118	67224007	2841236015
Nephrotic syndrome, focal and segmental glomerular lesions	renal	K015.00	K015	K015.00	303833014	197594005	303833014
Henoch-Schonlein nephritis	vasculitis	D310100	D3101	D310100	354514013	236504007	354514013
Buerger's disease	vasculitis	G731000	G7310	G731000	87210015	52403007	87210015
Aortitis	vasculitis	G766.11	G766-1	G766.11	117829013	70933002	117829013
Hypersensitivity angiitis NOS	vasculitis	G752z00	G752z	G752z00	300577012	60555002	100606014
Other acute rheumatic heart disease	cardiovascular	G01y000	G01y0	G01y000	106492016	64072006	106492016
Other specified inflammatory polyarthropathy NOS	seronegative arthritis	N04yz00	N04yz	N04yz00	309849015	417373000	2548331017
Adult Still's Disease	rheumatoid	N005.00	N005	N005.00	463281000006113	239920006	359482019
Nephrotic syndrome, minor glomerular abnormality	renal	K014.00	K014	K014.00	303832016	197593004	303832016
Mucous colitis and/or proctitis	inflammatory bowel disease	J41..11	J41-1	J41..11	696071000006114	43752006	72962011
Tubulo-interstit nephritis, not specif as acute or chron	renal	K03T.00	K03T	K03T.00	83331000006110	428255004	2694843016
Other idiopathic proctocolitis	inflammatory bowel disease	J41y.00	J41y	J41y.00	302959019	418130002	2576688010
Acute rheumatic pericarditis	cardiovascular	G010.00	G010	G010.00	26565015	15676002	26565015
Circumscribed scleroderma	scleroderma	M210.00	M210	M210.00	308859010	201048007	308859010
Inflammatory polyarthropathy NOS	seronegative arthritis	N04z.00	N04z	N04z.00	309850015	417373000	2548331017
Type 2 diabetes mellitus with nephropathy	renal	C109C12	C109C-2	C109C12	84551000006113	420279001	3035432019
Subacute cutaneous lupus erythematosus	lupus	M154700	M1547	M154700	359447015	239891002	359447015
Linear scleroderma	scleroderma	M210400	M2104	M210400	38247018	22784002	38247018
Pemphigus vulgaris	pemphigus & pemphigoid	M144600	M1446	M144600	82318018	49420001	82318018
Linear morphoea	scleroderma	M210411	M2104-1	M210411	481428012	22784002	481428012
Psoriasis spondylitica	seronegative arthritis	M160000	M1600	M160000	198881000006116	200956002	308727011
Hepatic granulomas in sarcoidosis	sarcoid	J63A.00	J63A	J63A.00	303525019	197368002	303525019
Goodpasture's syndrome	vasculitis	G752000	G7520	G752000	84262013	50581000	84262013
Other nephritis and nephrosis in diseases EC	renal	K03y000	K03y0	K03y000	303903015	90708001	150315015
Nephrotic syndrome NOS	renal	K01z.00	K01z	K01z.00	303855018	52254009	86957016
Myalgia and myositis unspecified	dermatomyositis	N241.00	N241	N241.00	311696015	203108005	311696015
Juvenile rheumatoid arthritis NOS	rheumatoid	N043z00	N043z	N043z00	309828016	410795001	2472447010
Rheumatoid arthritis and other inflammatory polyarthropathy	rheumatoid	N04..00	N04	N04..00	168751000006115	69896004	116082011
Sarcoidosis of skin	sarcoid	AD53.00	AD53	AD53.00	1231546012	55941000	1231546012
Dermatopolymyositis, unspecified	dermatomyositis	N003X00	N003X	N003X00	614691000006113	396230008	1776211019
Systemic sclerosis	scleroderma	N001.12	N001-2	N001.12	147833014	89155008	147833014
Juvenile arthritis in psoriasis	seronegative arthritis	N045200	N0452	N045200	359310019	239803008	359310019
Crohn's disease of the terminal ileum	inflammatory bowel disease	J400200	J4002	J400200	601091000006115	196977009	302938014
Lupus pernio	sarcoid	AD53000	AD530	AD53000	502127019	72470008	502127019
Acute proliferative glomerulonephritis	renal	K000.00	K000	K000.00	303812017	197579006	303812017
Giant cell arteritis with polymyalgia rheumatica	polymyalgia	N200.00	N200	N200.00	359513016	239938009	359513016
Systemic lupus erythematosus with organ or sys involv	lupus	N000300	N0003	N000300	114251000006118	239887007	359443016
Orofacial Crohn's disease	inflammatory bowel disease	J08z900	J08z9	J08z900	302322010	196578009	302322010
Nephrotic syndrome with minimal change glomerulonephritis	renal	K013.00	K013	K013.00	396706011	266549004	396706011
Unsp nephrit synd, diff mesang prolif glomerulonephritis	renal	K03X.00	K03X	K03X.00	81261000006110	197679002	303967017
Ulcerative (chronic) enterocolitis	inflammatory bowel disease	J411.00	J411	J411.00	85891000006115	235714007	353357011
Necrotising vasculopathy, unspecified	vasculitis	G75X.00	G75X	G75X.00	681411000006118	943291000000106	2413281000000110
Rheumatoid vasculitis	vasculitis	N040N00	N040N	N040N00	1779323014	400054000	1779323014
Exacerbation of non-infective colitis	inflammatory bowel disease	J4z5.00	J4z5	J4z5.00	2532959018	414155001	2532959018
Microscopic colitis	inflammatory bowel disease	J436.00	J436	J436.00	353418019	235753003	353418019
Rheumatoid arthritis - multiple joint	rheumatoid	N040S00	N040S	N040S00	426510015	287006005	426510015
Juvenile seronegative polyarthritis	seronegative arthritis	N045100	N0451	N045100	2472449013	410797009	2472449013
Myopathy due to rheumatoid arthritis	rheumatoid	F396400	F3964	F396400	297641010	193250002	297641010
Juvenile rheumatoid arthritis	rheumatoid	N045500	N0455	N045500	2472447010	410795001	2472447010
Sexually acquired reactive arthropathy of multiple sites	seronegative arthritis	N011x00	N011x	N011x00	309477016	201481004	309477016
Acute nephritic syndrome	renal	K0A0.00	K0A0	K0A0.00	499033018	61503006	499033018
Adult-onset Still's disease	rheumatoid	N04y200	N04y2	N04y200	463301000006112	239920006	359482019
Distal interphalangeal psoriatic arthropathy	seronegative arthritis	M160100	M1601	M160100	359321011	239812005	359321011
Foliaceous pemphigus	pemphigus & pemphigoid	M144300	M1443	M144300	763291000006118	35154004	1228251016
Juvenile dermatomyositis	dermatomyositis	N003000	N0030	N003000	1784692011	1212005	1784692011
O/E-hands-rheumatoid spindling	rheumatoid	2G27.00	2G27	2G27.00	255925015	164456005	255925015
Lupus erythematosus chronicus	lupus	M154000	M1540	M154000	308700012	200937007	308700012
Ulcerative proctocolitis NOS	inflammatory bowel disease	J410z00	J410z	J410z00	302956014	295046003	435370011
Nephritis and nephropathy unspecified	renal	K03..00	K03	K03..00	677951000006111	52845002	87940013
Reactive arthropathy of hip	seronegative arthritis	N01w900	N01w9	N01w900	309570016	201567003	309570016
Pulseless disease	vasculitis	G757.12	G757-2	G757.12	475145012	359789008	475145012
Myocarditis in other diseases classified elsewhere	cardiovascular	G5y7.00	G5y7	G5y7.00	1494958019	195033009	1494958019
Thromboangiitis obliterans	vasculitis	G731.00	G731	G731.00	87208017	52403007	87208017
Other interstitial nephritis	renal	K03y200	K03y2	K03y200	303905010	28689008	48036015
Ulceration of vulva in Behcet's disease	vasculitis	K425200	K4252	K425200	304769016	198231000	304769016
Rheumatic fever without mention of heart involvement	cardiovascular	M15y600	M15y6	M15y600	308719019	200951007	308719019
Chronic proliferative glomerulonephritis	renal	K020.00	K020	K020.00	556211000006112	197613008	303862010
Other nephritis and nephrosis unspecified	renal	K03y.00	K03y	K03y.00	303902013	90708001	150315015
Diabetes mellitis with nephropathy NOS	renal	C104z00	C104z	C104z00	292496015	127013003	301016
Lymphocytic colitis	inflammatory bowel disease	J436100	J4361	J436100	52549017	31437008	52549017
Unspecif nephr synd, diff concentric glomerulonephritis	renal	K03U.00	K03U	K03U.00	81581000006119	64212008	106739010
Monarticular juvenile rheumatoid arthritis	rheumatoid	N043300	N0433	N043300	309827014	201799006	309827014
Mesangioproliferative glomerulonephritis NEC	renal	K032y13	K032y-3	K032y13	354347017	197613008	303860019
Other specified inflammatory polyarthropathy	seronegative arthritis	N04y.00	N04y	N04y.00	309841017	3723001	7278014
Acute rheumatic endocarditis	cardiovascular	G011.00	G011	G011.00	30726017	18192007	30726017
Exacerbation of Crohn's disease of small intestine	inflammatory bowel disease	J400500	J4005	J400500	2532958014	414154002	2532958014
Drug-induced systemic lupus erythematosus	lupus	N000200	N0002	N000200	309405011	201436003	309405011
O/E - ankyl.spondyl.chest def.	seronegative arthritis	2377	2377	2377	253940015	162930007	2668362011
Fibromyositis NOS	dermatomyositis	N241200	N2412	N241200	311702015	24693007	41382010
Rheumatoid arthropathy + visceral/systemic involvement NOS	rheumatoid	N042z00	N042z	N042z00	162231000006117	239793008	359293019
Benign mucous membrane pemphigoid	pemphigus & pemphigoid	M146.00	M146	M146.00	57191017	34250006	485796014
Sclerodactyly	scleroderma	M210500	M2105	M210500	308870015	201051000	308870015
Ocular pemphigoid	pemphigus & pemphigoid	F4Cy100	F4Cy1	F4Cy100	267631000006119	34250006	485794012
Takayasu's disease	vasculitis	G757.00	G757	G757.00	475138012	359789008	475138012
Pulmonary arteritis	vasculitis	G42y000	G42y0	G42y000	30382015	17993000	30382015
Exacerbation of Crohn's disease of large intestine	inflammatory bowel disease	J401200	J4012	J401200	2532950019	414153008	2532950019
Collagenous colitis	inflammatory bowel disease	J436000	J4360	J436000	32563019	19311003	32563019
Crohn's disease of the ileum NOS	inflammatory bowel disease	J400400	J4004	J400400	302940016	38106008	64705019
Interstitial myositis	dermatomyositis	N23y000	N23y0	N23y000	93019012	55925001	93019012
Presenile gangrene	vasculitis	G731100	G7311	G731100	300502019	195299000	300502019
Cicatricial pemphigoid	pemphigus & pemphigoid	M146011	M1460-1	M146011	57192012	34250006	57192012
Lipoid nephrosis	renal	K013.11	K013-1	K013.11	74720014	44785005	74720014
Poikilodermatomyositis	dermatomyositis	N003.11	N003-1	N003.11	143230018	396230008	1776211019
Chronic nephritic syndrm focal+segmental glomerular lesions	renal	K0A3100	K0A31	K0A3100	555391000006117	197709005	304006019
Sarcoid arthropathy	sarcoid	AD55.00	AD55	AD55.00	477671011	361197009	477671011
Polyneuropathy in sarcoidosis	sarcoid	F374900	F3749	F374900	297566017	193195000	297566017
Lupus erythematosus migrans	lupus	M154200	M1542	M154200	308704015	200939005	308704015
Marie - Strumpell spondylitis	seronegative arthritis	N100.11	N100-1	N100.11	718001000006112	9631008	1235977013
Chronic rheumatic pericarditis	cardiovascular	G100.00	G100	G100.00	1494807015	56501009	1494807015
Renal tubulo-interstitial disorder in SLE	lupus	K0B4000	K0B40	K0B4000	177301000006114	307755009	451122013
Rapid progres neph syn diffuse membranous glomerulonephritis	renal	K0A1200	K0A12	K0A1200	191861000006119	197692004	303980019
Mesangiocapillary glomerulonephritis NEC	renal	K032y14	K032y-4	K032y14	354380012	80321008	133280014
Rheumatoid arthritis of PIP joint of finger	rheumatoid	N040900	N0409	N040900	162131000006111	201773004	309796016
Rheumatoid arthritis of MCP joint	rheumatoid	N040800	N0408	N040800	162111000006117	201772009	309795017
Juvenile ankylosing spondylitis	seronegative arthritis	N045000	N0450	N045000	359312010	239805001	359312010
Other non-infective inflammatory gastroenteritis and colitis	inflammatory bowel disease	J43..00	J43	J43..00	396361018	71207007	118245016
Systemic lupus erythematosus NOS	lupus	N000z00	N000z	N000z00	309408013	55464009	92208011
Ulcerative (chronic) ileocolitis	inflammatory bowel disease	J412.00	J412	J412.00	85901000006116	196987008	302953018
[X]Other myositis	dermatomyositis	Nyu8000	Nyu80	Nyu8000	312633011	26889001	44991019
Addison's keloid	scleroderma	M210.11	M210-1	M210.11	308860017	201048007	308865010
Livedoid vasculitis	vasculitis	M2y0200	M2y02	M2y0200	357845012	238762002	357845012
Other heart disorders in other diseases classified elsewhere	cardiovascular	G5yA.00	G5yA	G5yA.00	48361011	28880005	48361011
Other nephritis and nephrosis NOS	renal	K03yz00	K03yz	K03yz00	303906011	90708001	150315015
Polyneuropathy in disseminated lupus erythematosus	lupus	F371000	F3710	F371000	297542011	193178008	297542011
Progressive systemic sclerosis	scleroderma	N001000	N0010	N001000	147834015	444133002	2842339011
Other rheumatoid arthritis of spine	rheumatoid	N040100	N0401	N040100	309788014	9631008	16840014
Regional enteritis of the large bowel	inflammatory bowel disease	J401.00	J401	J401.00	1495442018	7620006	1495442018
Rheumatoid arthritis of cervical spine	rheumatoid	N040000	N0400	N040000	309787016	201764007	309787016
Acute rheumatic heart disease, unspecified	cardiovascular	G01..00	G01	G01..00	299566014	703119002	3007168016
Lupus erythematosus tumidus	lupus	M154500	M1545	M154500	308706018	200941006	308706018
Ocular pemphigoid	pemphigus & pemphigoid	M146100	M1461	M146100	485794012	34250006	485794012
Systemic lupus erythematosus disease activity index	lupus	ZRq9.00
Lupus erythematosus profundus	lupus	M154400	M1544	M154400	25612013	15084002	25612013
Pauciarticular onset juvenile chronic arthritis	seronegative arthritis	N045600	N0456	N045600	502690012	74391003	502690012
Sarcoid heart disease	sarcoid	G558300	G5583	G558300	161591000006114	195033009	300056015
BILAG - British isles lupus assessment group score	lupus	ZR2l.11
Polyneuropathy in polyarteritis nodosa	vasculitis	F371100	F3711	F371100	297543018	193179000	297543018
Nephrotic syndrome in systemic lupus erythematosus	renal	K01x400	K01x4	K01x400	677561000006119	68815009	114310015
Myositis in sarcoidosis	sarcoid	N233200	N2332	N233200	311616019	203042003	311616019
Acute polyarticular juvenile rheumatoid arthritis	rheumatoid	N043100	N0431	N043100	125937016	75822003	125937016
Other acute glomerulonephritis NOS	renal	K00yz00	K00yz	K00yz00	303820015	19351000	32619017
Nephrotic syndrome in amyloidosis	renal	K01x000	K01x0	K01x000	303845017	197604006	303845017
Acute rheumatic myocarditis	cardiovascular	G012.00	G012	G012.00	299567017	194709000	299567017
Rheumatic fever without mention of heart involvement	cardiovascular	G00..00	G00	G00..00	40870016	24363009	40870016
Acute focal nephritis	renal	K00y200	K00y2	K00y200	303818018	197584000	303818018
Ulcerative ileocolitis	inflammatory bowel disease	J410000	J4100	J410000	302953018	196987008	302953018
Rheumatoid arthritis of wrist	rheumatoid	N040700	N0407	N040700	309794018	201771002	309794018
Rheumatoid arthritis of hip	rheumatoid	N040B00	N040B	N040B00	309798015	201775006	309798015
Sarcoidosis of lymph nodes	sarcoid	AD51.00	AD51	AD51.00	1232607019	64757003	1232607019
Horton's disease	polymyalgia	G755200	G7552	G755200	1787110010	400130008	1787110010
Other specified nephritis, nephrosis or nephrotic syndrome	renal	K0y..00	K0y	K0y..00	304056012	90708001	150315015
Other rheumatoid arthropathy + visceral/systemic involvement	rheumatoid	N042.00	N042	N042.00	16911000006114	239793008	359293019
Erythematous pemphigus	pemphigus & pemphigoid	M144200	M1442	M144200	648451000006115	36739006	61281014
Benign familial chronic pemphigus	pemphigus & pemphigoid	PH33111	PH331-1	PH33111	1234363013	79468000	1234363013
Meningitis due to sarcoidosis	sarcoid	F013.00	F013	F013.00	296819018	192673008	296819018
Recur+persist haemuria df mesangial prolif glomerulnephritis	renal	K0A2300	K0A23	K0A2300	189171000006118	714825002	3300556017
Enterobacterial spondylitis	seronegative arthritis	N11y100	N11y1	N11y100	311113014	202699004	311113014
Myocarditis in other diseases classified elsewhere	cardiovascular	G5y8.00	G5y8	G5y8.00	300221014	195136004	300221014
Arthropathy in Reiter's disease	seronegative arthritis	N011.12	N011-2	N011.12	492981000006114	415141001	2532865019
Rapid progressive nephritic syndrome, dense deposit disease	renal	K0A1600	K0A16	K0A1600	191901000006114	197696001	303984011
Hypocomplementaemic persistent glomerulonephritis NEC	renal	K032y11	K032y-1	K032y11	354349019	197613008	303860019
Reactive arthropathy of ankle	seronegative arthritis	N01wD00	N01wD	N01wD00	309574013	201571000	309574013
Nephrotic syn,difus endocapilary proliftv glomerulonephritis	renal	K018.00	K018	K018.00	677481000006113	197597003	303836018
Juvenile rheumatoid arthropathy unspecified	rheumatoid	N043000	N0430	N043000	309824019	410793008	2472445019
Listerial cerebral arteritis	vasculitis	A270300	A2703	A270300	286395017	186317009	286395017
[X]Inflammatory polyarthropathies	seronegative arthritis	Nyu1.00	Nyu1	Nyu1.00	312516012	477941000000100	967611000000119
Rheumatoid arthritis of knee	rheumatoid	N040D00	N040D	N040D00	309800010	201777003	309800010
Rheumatoid arthritis of 1st MTP joint	rheumatoid	N040K00	N040K	N040K00	168761000006118	201783000	309807013
Rheumatoid arthritis of ankle	rheumatoid	N040F00	N040F	N040F00	309802019	201779000	309802019
Regional enteritis of the small bowel	inflammatory bowel disease	J400.00	J400	J400.00	179571000006119	56689002	94270018
Granulomatous enteritis	inflammatory bowel disease	J40..12	J40-2	J40..12	56770011	34000006	56765016
Cogan's syndrome	vasculitis	F4A5111	F4A51-1	F4A5111	2157584018	405810005	2157584018
Systemic lupus activity measure	lupus	ZRq8.00
Gonococcal spondylitis	seronegative arthritis	A985300	A9853	A985300	89215016	53664003	89215016
Regional enteritis NOS	inflammatory bowel disease	J40z.00	J40z	J40z.00	302947018	34000006	56765016
Benign pemphigus	pemphigus & pemphigoid	M144000	M1440	M144000	308653014	200902009	308653014
Myopathy due to sarcoidosis	sarcoid	F396500	F3965	F396500	297643013	193251003	297643013
Reactive arthropathy of shoulder	seronegative arthritis	N01w000	N01w0	N01w000	309561019	201558003	309561019
Reactive arthropathy of knee	seronegative arthritis	N01wB00	N01wB	N01wB00	309572012	201569000	309572012
Rheumatoid nodule	rheumatoid	N040R00	N040R	N040R00	162341000006115	33719002	485614018
[X]Other ulcerative colitis	inflammatory bowel disease	Jyu4100	Jyu41	Jyu4100	303762015	64766004	107644019
Pemphigus NOS	pemphigus & pemphigoid	M144z00	M144z	M144z00	308660015	65172003	108297019
[X]Other giant cell arteritis	polymyalgia	Nyu4100	Nyu41	Nyu4100	312576015	414341000	2534171012
[X]Other reactive arthropathies	seronegative arthritis	Nyu0300	Nyu03	Nyu0300	312513016	239783001	359275015
[X]Other dermatomyositis	dermatomyositis	Nyu4400	Nyu44	Nyu4400	312580013	396230008	1776211019
Oculomotor apraxia - Cogan type	vasculitis	F483511	F4835-1	F483511	266831000006117	405809000	2157583012
Acute neph syn, diffuse mesangiocapillary glomerulonephritis	renal	K0A0500	K0A05	K0A0500	458441000006117	197686005	303974010
Acute diffuse nephritis	renal	K00y300	K00y3	K00y300	303819014	197585004	303819014
Acut neph syn, diffuse mesangial prolifrative glomnephritis	renal	K0A0300	K0A03	K0A0300	455321000006114	197684008	303972014
Myopathy due to scleroderma	scleroderma	F396600	F3966	F396600	297644019	193252005	297644019
Multiple cranial nerve palsies in sarcoidosis	sarcoid	F326300	F3263	F326300	297440017	193101001	297440017
[X]Seropositive rheumatoid arthritis, unspecified	rheumatoid	Nyu1G00	Nyu1G	Nyu1G00	312534011	239791005	359291017
Chron neph syn difus mesangial prolifrtiv glomerulonephritis	renal	K0A3300	K0A33	K0A3300	553181000006118	197613008	303861015
Nephrotic syndrome, dense deposit disease	renal	K01A.00	K01A	K01A.00	303838017	197599000	303838017
Chron nephritic syndrom difuse membranous glomerulonephritis	renal	K0A3200	K0A32	K0A3200	553201000006117	77182004	1234074010
Pemphigus vegetans	pemphigus & pemphigoid	M144500	M1445	M144500	476760014	14800001	476759016
Cryoglobulinaemic purpura	vasculitis	C332000	C3320	C332000	293372017	190814002	293372017
Systemic lupus erythematosus with organ or sys involv	lupus	N000100	N0001	N000100	496853017	54072008	496853017
Myopathy due to polyarteritis nodosa	vasculitis	F396300	F3963	F396300	297640011	193249002	297640011
Steroid sensitive nephrotic syndrome	renal	K013.12	K013-2	K013.12	127091000006118	236380004	354331019
Rheumatic heart disease, unspecified	cardiovascular	G1yz.00	G1yz	G1yz.00	299633016	23685000	39767019
Rpd prog neph syn df mesangial prolifratv glomerulonephritis	renal	K0A1300	K0A13	K0A1300	165061000006114	197693009	303981015
Benign mucous membrane pemphigoid NOS	pemphigus & pemphigoid	M146z00	M146z	M146z00	308669019	34250006	57191017
Pemphigoid NOS	pemphigus & pemphigoid	M145z00	M145z	M145z00	308664012	86142006	142845014
Rapidly progressive nephritis unspecified	renal	K033.00	K033	K033.00	303894017	236392004	354352010
Reactive arthropathy of wrist	seronegative arthritis	N01w500	N01w5	N01w500	309566012	201563004	309566012
[X]Other forms of systemic lupus erythematosus	lupus	Nyu4300	Nyu43	Nyu4300	312579010	55464009	92208011
Nephrotic syndrome in polyarteritis nodosa	renal	K01x300	K01x3	K01x300	303849011	197607004	303849011
Behcet's syndrome arthropathy	vasculitis	N012011	N0120-1	N012011	499415017	62918002	499415017
[X]Other psoriatic arthropathies	seronegative arthritis	Nyu1300	Nyu13	Nyu1300	312521010	33339001	55626019
Retinal vasculitis NOS	vasculitis	F421E00	F421E	F421E00	297777014	77628002	128847018
Non-insulin dependent diabetes mellitus with nephropathy	renal	C109C00	C109C	C109C00	280531000006119	420279001	3035432019
Rheumatoid arthritis of elbow	rheumatoid	N040500	N0405	N040500	309792019	201769002	309792019
Rheumatic heart disease, unspecified	cardiovascular	G1yzz00	G1yzz	G1yzz00	299636012	23685000	39767019
Non-infective jejunitis NOS	inflammatory bowel disease	J4z1.00	J4z1	J4z1.00	303049010	80805005	134030018
Rheumatic fever without mention of heart involvement	cardiovascular	G0y..00	G0y	G0y..00	299577015	26424001	44256019
Crohn's disease NOS	inflammatory bowel disease	J40z.11	J40z-1	J40z.11	1222351011	34000006	56765016
Unspecified nephritic syndrome, dense deposit disease	renal	K03V.00	K03V	K03V.00	77541000006113	462181000000102	891521000000111
Chronic nephritic syndrome, dense deposit disease	renal	K0A3600	K0A36	K0A3600	304011017	197714009	304011017
Recur+persist hmuria df mesangiocapilary glomerulonephritis	renal	K0A2500	K0A25	K0A2500	189181000006115	714819001	3300538017
Recur+persist haematuria difus crescentic glomerulonephritis	renal	K0A2700	K0A27	K0A2700	189131000006116	714815007	3300526014
Chronic nephritic syn diffuse crescentic glomerulonephritis	renal	K0A3700	K0A37	K0A3700	555381000006115	197715005	304012012
Other chronic glomerulonephritis	renal	K02y.00	K02y	K02y.00	303864011	20917003	35171019
[X]Other vasculitis limited to the skin	vasculitis	Myu7A00	Myu7A	Myu7A00	309386010	11263005	19515010
Recur+persist haematuria difus membranous glomerulonephritis	renal	K0A2200	K0A22	K0A2200	189141000006114	714821006	3300544018
Chronic membranoproliferative glomerulonephritis	renal	K022.00	K022	K022.00	555191000006119	80321008	133282018
Isoltd prteinur+specfd morph les df mesangiocap glomnephr	renal	K0A4500	K0A45	K0A4500	745481000006111	197723007	304020014
Acute nephrotic syndrm diffuse crescentic glomerulonephritis	renal	K0A0700	K0A07	K0A0700	458521000006111	197688006	303976012
Reactive arthropathy of elbow	seronegative arthritis	N01w300	N01w3	N01w300	309564010	201561002	309564010
Hypersensitivity arteritis	vasculitis	G752.11	G752-1	G752.11	789831000006117	60555002	100606014
Rapid progres nephritic syn df crescentic glomerulonephritis	renal	K0A1700	K0A17	K0A1700	191881000006112	197697005	303985012
Polyarteritis nodosa and allied conditions	vasculitis	G75..00	G75	G75..00	300565019	155441006	242065019
Polyneuropathy in rheumatoid arthritis	rheumatoid	F371200	F3712	F371200	297544012	193180002	297544012
Rheumatic myocarditis	cardiovascular	G1y0.00	G1y0	G1y0.00	299631019	194750008	299631019
Unsp nephrit synd, diff endocap prolif glomerulonephritis	renal	K03W.00	K03W	K03W.00	81251000006113	3704008	7243014
Regional enteritis of the colon	inflammatory bowel disease	J401000	J4010	J401000	179521000006115	50440006	1230866018
Arthropathy in Behcet's syndrome of multiple sites	vasculitis	N012x00	N012x	N012x00	309490011	201492003	309490011
Anaphylactoid glomerulonephritis	renal	K032300	K0323	K032300	303881019	197629000	303881019
Reactive arthropathy of IP joint of toe	seronegative arthritis	N01wK00	N01wK	N01wK00	192711000006116	201577001	309580017
Sexually acquired reactive arthropathy	seronegative arthritis	N011.00	N011	N011.00	146521000006111	267883008	400164011
Regional enteritis of the jejunum	inflammatory bowel disease	J400100	J4001	J400100	302937016	196976000	302937016
Rheumatoid arthritis of DIP joint of finger	rheumatoid	N040A00	N040A	N040A00	162041000006117	201774005	309797013
Rheumatic chorea without heart involvement	cardiovascular	G021.00	G021	G021.00	168411000006110	46826000	78053017
SLEDAI-Sys lup ery dis act ind	lupus	ZRq9.11
Rheumatoid arthritis of distal radio-ulnar joint	rheumatoid	N040600	N0406	N040600	162051000006115	201770001	309793012
[X]Noninfective enteritis and colitis	inflammatory bowel disease	Jyu4.00	Jyu4	Jyu4.00	400051000006118	307418008	450679011
Other acute glomerulonephritis	renal	K00y.00	K00y	K00y.00	303815015	19351000	32619017
Other chronic glomerulonephritis NOS	renal	K02yz00	K02yz	K02yz00	303869018	20917003	35171019
Lupus erythematosus unguium mutilans	lupus	M154600	M1546	M154600	308707010	200942004	308707010
Type II diabetes mellitus with nephropathy	renal	C109C11	C109C-1	C109C11	84921000006110	420279001	3013392012
Regional enteritis of the rectum	inflammatory bowel disease	J401100	J4011	J401100	488238014	3815005	488238014
Rheumatic fever without mention of heart involvement	cardiovascular	H571.00	H571	H571.00	13455018	7548000	13455018
Chronic rapidly progressive glomerulonephritis	renal	K023.00	K023	K023.00	303863017	236392004	354352010
Lupus erythematosus nodularis	lupus	M154300	M1543	M154300	308705019	200940007	308705019
Chronic diffuse glomerulonephritis	renal	K02y300	K02y3	K02y300	303868014	197619007	303868014
Acute nephritic syndrome, focal+segmental glomerular lesions	renal	K0A0100	K0A01	K0A0100	458481000006111	197682007	303970018
Crohn's disease of the ileum unspecified	inflammatory bowel disease	J400300	J4003	J400300	302939018	38106008	64705019
Acute nephritic syn, diffuse membranous glomerulonephritis	renal	K0A0200	K0A02	K0A0200	458451000006115	197683002	303971019
Chronic nephritic syndrome, minor glomerular abnormality	renal	K0A3000	K0A30	K0A3000	304005015	197708002	304005015
Isoltd prteinur/spcfd morph lesn df mesngl prolf glomneph	renal	K0A4300	K0A43	K0A4300	742241000006111	197721009	304018011
Nephritis unsp+OS membranoprolif glomerulonephritis lesion	renal	K032y00	K032y	K032y00	677981000006115	52845002	87940013
Thromboangiitis obliterans NOS	vasculitis	G731z00	G731z	G731z00	300503012	52403007	87208017
Acute nephritis with lesions of necrotising glomerulitis	renal	K001.00	K001	K001.00	303814016	197580009	303814016
Wildfire pemphigus	pemphigus & pemphigoid	M144700	M1447	M144700	77439010	46459009	77439010
Focal membranoproliferative glomerulonephritis	renal	K032000	K0320	K032000	303877019	197626007	303877019
Postdysenteric reactive arthropathy of the ankle and foot	seronegative arthritis	N013700	N0137	N013700	217691000006119	201503001	309501016
Rheumatic diseases of endocardium, valve unspecified	cardiovascular	G14..00	G14	G14..00	299615010	46165000	76971016
Polyarteritis nodosa and allied conditions NOS	vasculitis	G75z.00	G75z	G75z.00	300596011	155441006	242065019
Acrosclerosis	scleroderma	N001.11	N001-1	N001.11	1785104011	298285004	1785104011
Giant cell arteritis NOS	polymyalgia	G755z00	G755z	G755z00	300584016	414341000	2534171012
Arthropathy in Behcet's syndrome	vasculitis	N012.00	N012	N012.00	104572011	62918002	104572011
Acute rheumatic heart disease, unspecified	cardiovascular	G01z.00	G01z	G01z.00	299573016	312591002	456339019
Reactive arthropathy of MCP joint	seronegative arthritis	N01w600	N01w6	N01w600	192741000006117	201564005	309567015
[X]Other Crohn's disease	inflammatory bowel disease	Jyu4000	Jyu40	Jyu4000	303761010	34000006	56765016
Rheumatic chorea with heart involvement	cardiovascular	G020.00	G020	G020.00	96117016	57803009	96117016
[X]Other pemphigoid	pemphigus & pemphigoid	Myu1200	Myu12	Myu1200	309311010	86142006	142845014
[X]Other specified rheumatoid arthritis	rheumatoid	Nyu1200	Nyu12	Nyu1200	312520011	69896004	116082011
Rheumatoid arthritis of talonavicular joint	rheumatoid	N040H00	N040H	N040H00	309804018	201781003	309804018
Sexually acquired reactive arthropathy NOS	seronegative arthritis	N011z00	N011z	N011z00	309479018	267883008	400162010
Juvenile arthritis in ulcerative colitis	inflammatory bowel disease	N045400	N0454	N045400	309836013	201807008	309836013
Rapidly progressive nephritic syndrome	renal	K0A1.00	K0A1	K0A1.00	303977015	197689003	303977015
Arthropathy in Behcet's syndrome of unspecified site	vasculitis	N012000	N0120	N012000	400165012	62918002	104572011
[X]Unsp nephrit synd, diff mesang prolif glomerulonephritis	renal	Kyu0900	Kyu09	Kyu0900	430101000006111	197679002	303967017
[X]Other forms of systemic sclerosis	scleroderma	Nyu4500	Nyu45	Nyu4500	312581012	89155008	147833014
Rheumatoid arthritis of other tarsal joint	rheumatoid	N040J00	N040J	N040J00	309805017	429192004	2696026017
Benign mucous membrane pemphigoid with no eye involvement	pemphigus & pemphigoid	M146000	M1460	M146000	399920011	267800008	399920011
Regional enteritis of the duodenum	inflammatory bowel disease	J400000	J4000	J400000	497569010	56287005	497569010
Isolatd proteinur/specfd morphlgcl les df membrn glomneph	renal	K0A4200	K0A42	K0A4200	712841000006115	197720005	304017018
Circumscribed scleroderma NOS	scleroderma	M210z00	M210z	M210z00	308871016	201048007	308856015
Sarcoidosis of inferior turbinates	sarcoid	AD54.00	AD54	AD54.00	454209012	310607007	454209012
[X]Vasculitis limited to skin, unspecified	vasculitis	Myu7G00	Myu7G	Myu7G00	309393014	53312001	88651012
Acute rheumatic heart disease, unspecified	cardiovascular	G02z.00	G02z	G02z.00	299576012	46826000	78053017
Chronic neph syn difus mesangiocapillary glomerulonephritis	renal	K0A3500	K0A35	K0A3500	555371000006118	197713003	304010016
[X]Sarcoidosis of other and combined sites	sarcoid	Cyu0600	Cyu06	Cyu0600	293742013	31541009	52728016
Sexually acquired reactive arthropathy of the lower leg	seronegative arthritis	N011600	N0116	N011600	309475012	267883008	400162010
Unspecified circumscribed scleroderma	scleroderma	M210000	M2100	M210000	308855016	201048007	308856015
Other acute rheumatic heart disease	cardiovascular	G01y.00	G01y	G01y.00	299570018	312591002	456339019
Rheumatoid arthritis of subtalar joint	rheumatoid	N040G00	N040G	N040G00	309803012	201780002	309803012
[X]Reactive arthropathy in other diseases CE	seronegative arthritis	Nyu0500	Nyu05	Nyu0500	424491000006118	239783001	359275015
IgA nephropathy	renal	K0A2800	K0A28	K0A2800	354379014	236407003	354379014
[X]Other postinfectious arthropathies in diseases CE	seronegative arthritis	Nyu0400	Nyu04	Nyu0400	412771000006110	239783001	359275015
Dermatopolymyositis in neoplastic disease	dermatomyositis	N003100	N0031	N003100	359459016	239901009	359459016
Acute febrile mucocutaneous lymph node syndrome NOS	vasculitis	G751z00	G751z	G751z00	300572018	75053002	124650010
BASDAI - Bath ankylosing spondylitis disease activity index	seronegative arthritis	388p.00	388p	388p.00	2692996011	441562009	2817026019
[X]Other seropositive rheumatoid arthritis	rheumatoid	Nyu1100	Nyu11	Nyu1100	312518013	239791005	359291017
Polymyositis ossificans	dermatomyositis	N231400	N2314	N231400	6839012	3458000	6839012
Acute exudative nephritis	renal	K00y100	K00y1	K00y100	303817011	197583006	303817011
Nephritis unsp+membranoprolif glomerulonephritis lesion NOS	renal	K032z00	K032z	K032z00	677971000006118	52845002	87940013
Nephrotic syndrome with other pathological kidney lesions	renal	K01y.00	K01y	K01y.00	303854019	52254009	86957016
Other rheumatic aortic valve diseases	cardiovascular	Gyu1100	Gyu11	Gyu1100	300864010	12023003	20718019
[X]Other juvenile arthritis	seronegative arthritis	Nyu1500	Nyu15	Nyu1500	312523013	239796000	359297018
Reactive arthropathy of sacro-iliac joint	seronegative arthritis	N01wA00	N01wA	N01wA00	192771000006113	201568008	309571017
[X]Dermatopolymyositis, unspecified	dermatomyositis	Nyu4E00	Nyu4E	Nyu4E00	312591018	396230008	1776211019
	seronegative arthritis	M160.11	M160-1	M160.11	55628018	33339001	55628018
Mixed membranous and proliferative glomerulonephritis NEC	renal	K032y15	K032y-5	K032y15	354346014	52845002	87940013
[X]Other pemphigus	pemphigus & pemphigoid	Myu1000	Myu10	Myu1000	309309018	65172003	108297019
Rapid progres nephritic syn focal+segmental glomerulr lesion	renal	K0A1100	K0A11	K0A1100	191891000006110	197691006	303979017
Chronic glomerulonephritis + diseases EC	renal	K02y000	K02y0	K02y000	554481000006111	197616000	303865012
Balkan nephropathy	renal	K0B6.00	K0B6	K0B6.00	43768016	26121002	43768016
Rheumatoid arthritis of lesser MTP joint	rheumatoid	N040L00	N040L	N040L00	162101000006115	201784006	309808015
Disease activity score in rheumatoid arthritis	rheumatoid	38DZ.00	38DZ	38DZ.00	2842168015	763259004	3638311016
Rheumatoid arthritis of sacro-iliac joint	rheumatoid	N040C00	N040C	N040C00	162141000006118	201776007	309799011
Rheumatoid arthritis of acromioclavicular joint	rheumatoid	N040400	N0404	N040400	309791014	201768005	309791014
Cerebral lupus	lupus	N000600	N0006	N000600	512234017	95644001	512234017
Delivery of rehabilitation for rheumatoid arthritis	rheumatoid	7P20300	7P203	7P20300	371261000000111	231041000000107	371261000000111
Remitting seronegative symmetrical synovitis pitting oedema	seronegative arthritis	N04y300	N04y3	N04y300	1756301000006110	445345005	2871569011
Disease activity score 28 joint in rheumatoid arthritis	rheumatoid	38DZ000	38DZ0	38DZ000	2839291014	441870009	2817437013
Ulcerative pancolitis	inflammatory bowel disease	J413.00	J413	J413.00	2872721013	444548001	2872721013
Microscopic polyangiitis	vasculitis	G75A.00	G75A	G75A.00	2157271000000110	829821000000102	2157271000000110
Acute infective interstitial nephritis	renal	K08y700	K08y7	K08y700	1232869016	66993009	1232869016
Rheumatoid arthritis annual review	rheumatoid	66HB000	66HB0	66HB000	2196791000000110	847261000000104	2196791000000110
Crescentic glomerulonephritis	renal	K000100	K0001	K000100	354363013	236398000	354363013
Acute tubulo-interstitial nephritis	renal	K08y513	K08y5-3	K08y513	1225987015	28637003	1225987015
Rapidly progressive glomerulonephritis	renal	K0A8.00	K0A8	K0A8.00	354352010	236392004	354352010
Acute scleroderma renal crisis	scleroderma	K0H..00	K0H	K0H..00	354513019	236503001	354513019
SLAM - Systemic lupus activity measure	lupus	ZRq8.11
Except rheumatoid arthritis qual indicator: informed dissent	rheumatoid	9hR1.00	9hR1	9hR1.00	1785241000006110	805981000000102	1801871000000110
Exception reporting: rheumatoid arthritis quality indicators	rheumatoid	9hR..00	9hR	9hR..00	1785221000006110	805941000000105	1801791000000110
Except rheumatoid arthritis quality indicator: pt unsuitable	rheumatoid	9hR0.00	9hR0	9hR0.00	1785231000006110	805961000000106	1801831000000110
[X]Rheumatoid arthritis+involvement/other organs or systems	rheumatoid	Nyu1000	Nyu10	Nyu1000	424981000006114	239793008	359293019
Anti GBM disease - Antiglomerular basement membrane disease	renal	G752112	G7521-2	G752112	2214081000000110	236506009	2214081000000110
Rheumatoid arthritis of IP joint of toe	rheumatoid	N040M00	N040M	N040M00	162081000006111	201785007	309809011
Management of inflammatory bowel disease	inflammatory bowel disease	8Cc5.00	8Cc5	8Cc5.00	2269891000000110	700104004	2989471019
Rheumatoid arthritis monitoring invitation	rheumatoid	9mM..00	9mM	9mM..00	2275501000000110	882321000000105	2275501000000110
Renal involvement in scleroderma	scleroderma	K0J0.00	K0J0	K0J0.00	354512012	236502006	354512012
Rheumatoid arthritis monitoring invitation first letter	rheumatoid	9mM0.00	9mM0	9mM0.00	2275671000000110	882401000000106	2275671000000110
	cardiovascular	GA...00	GA	GA...00	39767019	23685000	39767019
Rheumatoid arthritis monitoring invitation second letter	rheumatoid	9mM1.00	9mM1	9mM1.00	2275711000000110	882421000000102	2275711000000110
	cardiovascular	GA0..00	GA0	GA0..00	2287941000000110	703119002	3007168016
Rheumatoid arthritis monitoring verbal invitation	rheumatoid	9mM3.00	9mM3	9mM3.00	2275791000000110	882461000000105	2275791000000110
Rheumatoid arthritis monitoring invitation third letter	rheumatoid	9mM2.00	9mM2	9mM2.00	2275751000000110	882441000000109	2275751000000110
AIN - Acute interstitial nephritis	renal	K08y511	K08y5-1	K08y511	1225985011	28637003	1225985011
Rheumatoid arthritis of tibio-fibular joint	rheumatoid	N040E00	N040E	N040E00	162191000006110	201778008	309801014
Rheumatoid arthritis monitoring telephone invitation	rheumatoid	9mM4.00	9mM4	9mM4.00	2275831000000110	882481000000101	2275831000000110
Rheumatoid arthritis of sternoclavicular joint	rheumatoid	N040300	N0403	N040300	309790010	201767000	309790010
Bath Ankylosing Spondylitis Functional Index	seronegative arthritis	388p000	388p0	388p000	2325761000000110	441680005	2817378011
Dietary education for inflammatory bowel disease	inflammatory bowel disease	8CA4W00	8CA4W	8CA4W00	2338581000000110	909671000000101	2338581000000110
CGN - Crescentic glomerulonephritis	renal	K000111	K0001-1	K000111	354364019	236398000	354364019
Granulomatosis with polyangiitis	vasculitis	G754.11	G754-1	G754.11	2955624019	195353004	2955624019
Bath Ankylosing Spondylitis Metrology Index	seronegative arthritis	38QL.00	38QL	38QL.00	2326221000000110	441930001	2817787017
Management of IBD (inflammatory bowel disease)	inflammatory bowel disease	8Cc5.11	8Cc5-1	8Cc5.11	2269901000000110	700104004	2989471019
ATIN - Acute tubulo-interstitial nephritis	renal	K08y512	K08y5-2	K08y512	1225986012	28637003	1225986012
Cryoglobulinaemic glomerulonephritis	renal	K036.00	K036	K036.00	354516010	236505008	354516010
